# Supplementary material for: WHO O2CoV2: oxygen requirements and respiratory support in patients with COVID-19 in low-and-middle income countries—protocol for a multicountry, prospective, observational cohort study
Source: PubMed Central journal article supplement — BMJ Open. 2023 Aug 17;13(8):e071346. doi: 10.1136/bmjopen-2022-071346 (PMC10441039; doi:10.1136/bmjopen-2022-071346), 2023-08-17
Supplement: bmjopen-2022-071346.draft_revisions.pdf [file bmjopen-2022-071346.draft_revisions.pdf]

# BMJ Open

BMJ Open is committed to open peer review. As part of this commitment we make the peer review history of every article we publish publicly available.

When an article is published we post the peer reviewers' comments and the authors' responses online. We also post the versions of the paper that were used during peer review. These are the versions that the peer review comments apply to.

The versions of the paper that follow are the versions that were submitted during the peer review process. They are not the versions of record or the final published versions. They should not be cited or distributed as the published version of this manuscript.

BMJ Open is an open access journal and the full, final, typeset and author-corrected version of record of the manuscript is available on our site with no access controls, subscription charges or pay-per-view fees (<http://bmjopen.bmj.com>).

If you have any questions on BMJ Open's open peer review process please email [info.bmjopen@bmj.com](mailto:info.bmjopen@bmj.com)

# BMJ Open

## WHO O2CoV2: Oxygen requirements and respiratory support in patients with COVID-19 in low- and middle-income countries – protocol for a multi-country, prospective, observational cohort study

|                               |                                                                                                                                                                                                                                                                                                                                                                                                                                                                                                                                                                                                                                                                                                                                                                                                                                                                     |
|-------------------------------|---------------------------------------------------------------------------------------------------------------------------------------------------------------------------------------------------------------------------------------------------------------------------------------------------------------------------------------------------------------------------------------------------------------------------------------------------------------------------------------------------------------------------------------------------------------------------------------------------------------------------------------------------------------------------------------------------------------------------------------------------------------------------------------------------------------------------------------------------------------------|
| Journal:                      | <i>BMJ Open</i>                                                                                                                                                                                                                                                                                                                                                                                                                                                                                                                                                                                                                                                                                                                                                                                                                                                     |
| Manuscript ID                 | bmjopen-2022-071346                                                                                                                                                                                                                                                                                                                                                                                                                                                                                                                                                                                                                                                                                                                                                                                                                                                 |
| Article Type:                 | Protocol                                                                                                                                                                                                                                                                                                                                                                                                                                                                                                                                                                                                                                                                                                                                                                                                                                                            |
| Date Submitted by the Author: | 09-Jan-2023                                                                                                                                                                                                                                                                                                                                                                                                                                                                                                                                                                                                                                                                                                                                                                                                                                                         |
| Complete List of Authors:     | <p>Relan, Pryanka; World Health Organization<br/> Murthy, Srinivas; University of British Columbia<br/> Marshall, John; University of Toronto<br/> Annane, Djillali; Raymond poincaré Hospital (APHP) and INSERM<br/> Chevret, Sylvie; INSERM<br/> Arabi, Yaseen; King Abdullah International Medical Research Center<br/> Waweru-Siika, Wangari; Aga Khan University (AKU) Nairobi<br/> Dominguez Rodriguez, Sara; World Health Organization<br/> Convocar, Pauline; Corazon Locsin Montelibano Memorial Medical Hospital, Manila Doctors Hospital, Southern Philippines Medical Center, Manila Philippines<br/> Diaz, Janet; World Health Organization<br/> Respiratory Support Research Group, World Health Organization; World Health Organization<br/> O2CoV2 International Study Steering Committee, World Health Organization; World Health Organization</p> |
| Keywords:                     | <p>COVID-19, INTENSIVE &amp; CRITICAL CARE, ACCIDENT &amp; EMERGENCY MEDICINE, RESPIRATORY MEDICINE (see Thoracic Medicine), Health policy &lt; HEALTH SERVICES ADMINISTRATION &amp; MANAGEMENT, Protocols &amp; guidelines &lt; HEALTH SERVICES ADMINISTRATION &amp; MANAGEMENT</p>                                                                                                                                                                                                                                                                                                                                                                                                                                                                                                                                                                                |
|                               |                                                                                                                                                                                                                                                                                                                                                                                                                                                                                                                                                                                                                                                                                                                                                                                                                                                                     |

SCHOLARONE™  
Manuscripts

**Title**

**WHO O2CoV2: Oxygen requirements and respiratory support in patients with COVID-19 in low- and middle-income countries – protocol for a multi-country, prospective, observational cohort study**

**Authors**

Pryanka Relan<sup>a</sup>, Srinivas Murthy<sup>b</sup>, John Marshall<sup>c</sup>, Djillali Annane<sup>d</sup>, Sylvie Chevret<sup>e</sup>, Yaseen Arabif<sup>f</sup>, Wangari Waweru-Siika<sup>g</sup>, Sara Dominguez Rodriguez<sup>a</sup>, Pauline Convocar<sup>h</sup>, Janet Diaz<sup>a</sup>, World Health Organization Respiratory Support Research Group\* and O2CoV2 International Study Steering Committee\*\*

- a) World Health Organization, Geneva, Switzerland, [relanp@who.int](mailto:relanp@who.int), [sara.dominguez.r@gmail.com](mailto:sara.dominguez.r@gmail.com), [diazj@who.int](mailto:diazj@who.int)
- b) University of British Columbia, Vancouver, Canada [srinivas.murthy@cw.bc.ca](mailto:srinivas.murthy@cw.bc.ca)
- c) University of Toronto, Toronto, Canada [john.marshall@unityhealth.to](mailto:john.marshall@unityhealth.to)
- d) University Paris Saclay-Versailles, School of Medicine Simone Veil, Raymond poincaré Hospital (APHP) and INSERM, Paris, France [djillali.annane@aphp.fr](mailto:djillali.annane@aphp.fr)
- e) Hôpital Saint-Louis and INSERM, Paris, France [sylvie.chevret@u-paris.fr](mailto:sylvie.chevret@u-paris.fr)
- f) King Saud Bin Abdulaziz University for Health Sciences, Ministry of National Guard Health Affairs, King Abdullah International Medical Research Center, Riyadh, Saudi Arabia [yaseenarabi@yahoo.com](mailto:yaseenarabi@yahoo.com)
- g) Aga Khan University (AKU) Nairobi, Kenya [wangari.siika@aku.edu](mailto:wangari.siika@aku.edu)
- h) Corazon Locsin Montelibano Memorial Medical Hospital, Manila Doctors Hospital, Southern Philippines Medical Center, Manila Philippines [convocar.pauline@gmail.com](mailto:convocar.pauline@gmail.com)

\*WHO Respiratory Support Research Working Group: Neill Adhikari, Diptesh Aryal, Tim Baker, Devasahayam J Christopher, Rob Fowler, Martha Gartley, Ewan Goligher, Rashan Haniffa, Devachandran Jayakumar, Richard H Kallet, Richard Kojan, Arthur Kwizera, Jie Li, Armand Mekontso-Dessap, Christian Paletta, Ingrid Lara Rendon, Elisabeth Riviello, Jorge Salluh, Jonathan A C Sterne, Bruno Martins Tomazini, Bharath Kumar Tirupakuzhi Vijayaraghavan, Fernando Zampieri.

\*\*WHO O2CoV2 International Study Steering Committee: Gasim Amrahli, John Appiah, Diptesh Aryal, Neale Batra, Kieran Bligh, Devasahayam J Christopher, Mohammed Derow, Laura Alejandra Velez Ruiz Gaitan, Itziar Carrasco Garcia, Bridget Griffith, Christophe Guitton, Madiha Hashmi, Rashidatu Kamara, Leticia Kawano-Dourado, Chiori Kodama, Richard Kojan, Gary Kuniyoshi, Arthur Kwizera, Maria Mendes, Dina Pfeifer, Cinzia De Brito Procopio, Ingrid Lara Rendon, Ludovic Reveiz, Elisabeth Riviello, Matthieu Rolland, Amadou Seck, Elizabeth Stanway, Julie Viry, Pushpa Wijesinghe.

**Corresponding author:** Pryanka Relan, World Health Organization, Avenue Appia 20, Geneva Switzerland 1203, [pryanka.relan@gmail.com](mailto:pryanka.relan@gmail.com), +41 79 772 9428

**Keywords:** Oxygen; emergency care; critical care; Low- and- middle-income countries (LMICs); severe acute respiratory illness (SARI); COVID-19

1  
2  
3 44 **Abstract** (Word count = 296).  
4  
5

6 46 **Introduction**

7 47 The severe acute respiratory syndrome coronavirus 2 (SARS-CoV-2) has been identified as the cause  
8 48 of the disease officially named COVID-19, primarily a respiratory illness. COVID-19 was characterized  
9 49 as a pandemic on 11 March 2020. It has been estimated that approximately 20% of people with COVID-  
10 50 19 require oxygen therapy. Oxygen has been listed on the WHO Essential Medicines List and Essential  
11 51 Medicines List for children for almost two decades. The COVID-19 pandemic has highlighted, more than  
12 52 ever, the acute need for scale-up of oxygen therapy. Detailed data on the use of oxygen therapy in  
13 53 LMICs at the patient and facility level are needed to target interventions better globally.  
14  
15

16 54  
17 55 **Methods and analysis**

18 56 We aim to include better describe the requirements and use of oxygen at the facility and patient level of  
19 57 approximately 4,500 patients with COVID-19 in 30 countries. Our objectives are specifically to  
20 58 characterize type and duration of different modalities of oxygen therapy delivered to patients; describe  
21 59 demographics and outcomes of hospitalized patients with COVID-19; and describe facility level oxygen  
22 60 production and support. Primary analyses will be descriptive in nature. Respiratory support transitions  
23 61 will be described in Sankey plots and Kaplan-Meier models will be used to estimate probability of each  
24 62 transition. A multi-state model will be used to study the course of hospital stay of the study population,  
25 63 evaluating transitions of escalating respiratory support transitions to the absorbing states.  
26  
27  
28

29 65 **Ethics and dissemination**

30 66 World Health Organization AdHoc Covid-19 Research Ethics Review Committee has approved this global  
31 67 protocol. When this protocol is adopted at specific country sites, national ERCs may make require  
32 68 adjustments in accordance with their respective national research ethics guidelines. Dissemination of  
33 69 this protocol and global findings will be open access through peer-reviewed scientific journals, study  
34 70 website, press and online media.  
35  
36  
37

38 72 **Registration details:** Clinicaltrials.gov number NCT04918875.  
39  
40  
41  
42  
43  
44  
45  
46  
47  
48  
49  
50  
51  
52  
53  
54  
55  
56  
57  
58  
59  
60

1  
2  
3 73 **Article Summary**

4 74 **Strengths and limitations of this study:**

- 5 75
- 6 76     ▪ This study is the first global description of oxygen use and respiratory support approaches for
  - 7 77     patients with COVID-19 collated from over 20 low-and-middle income countries (LMICs).
  - 8 78     ▪ The study will describe oxygen supply systems and oxygen production capacities in over 50
  - 9 79     hospitals in LMICs and link this facility-level information to patient outcomes through multistate
  - 10 80     model.
  - 11 81     ▪ The outcomes of this study will be used to inform future respiratory support research for COVID-
  - 12 82     19 and other conditions that require oxygen.
  - 13 83     ▪ The study offers a unique opportunity to build capacity in and between countries for conducting
  - 14 84     clinical research.
  - 15 85     ▪ Though variability in devices across countries limit precise calculations of oxygen consumption,
  - 16     this study is the first to attempt to estimate this on a global scale.
  - 17
  - 18
  - 19
  - 20
  - 21
  - 22
  - 23
  - 24
  - 25
  - 26
  - 27
  - 28
  - 29
  - 30
  - 31
  - 32
  - 33
  - 34
  - 35
  - 36
  - 37
  - 38
  - 39
  - 40
  - 41
  - 42
  - 43
  - 44
  - 45
  - 46
  - 47
  - 48
  - 49
  - 50
  - 51
  - 52
  - 53
  - 54
  - 55
  - 56
  - 57
  - 58
  - 59
  - 60

1  
2  
3 86 **Word count (excluding title page, abstract, references, acknowledgements): 3022**  
4 87

5  
6 88 **Introduction:**

7 89 The severe acute respiratory syndrome coronavirus 2 (SARS-CoV-2) has been identified as the cause  
8 90 of the respiratory disease officially named COVID-19. COVID-19 was declared a Public Health  
9 91 Emergency of International Concern on 30 January 2020 and characterized as a pandemic in March  
10 92 2020<sup>1</sup>.  
11 93

12  
13 94 Since January 2020, it has been estimated that approximately 20% of patients with COVID-19 develop  
14 95 hypoxia and require oxygen supportive therapy. Oxygen is an essential medicine and has been listed as  
15 96 such on the World Health Organization (WHO) Essential Medicines List and Essential Medicines List for  
16 97 children for almost two decades<sup>2,3</sup>. However, in many low and lower-middle income countries, there is  
17 98 inadequate production, supply and use of medical oxygen.  
18 99

19  
20 100 COVID-19 pandemic has highlighted, more than ever, the acute need for scale up of oxygen supply  
21 101 systems. WHO has published a biomedical inventory tool to quantify facility-level infrastructure and  
22 102 resources for the delivery of oxygen<sup>4</sup> and launched a global oxygen access scale up initiative<sup>5</sup>. However,  
23 103 data on the status of oxygen systems, their use and implications of oxygen therapy on patients in low-  
24 104 and middle-income countries remains lacking.  
25 105

26  
27 106 In February 2020, the WHO Research and Development Blueprint for COVID-19 identified key research  
28 107 areas needed for understanding this new disease<sup>6</sup>. One priority area was the types of respiratory  
29 108 support required by patients. To take this forward, the WHO COVID-19 Clinical Characterization and  
30 109 Management research group created a subgroup, the WHO Respiratory Support Research Group, to  
31 110 develop research protocols concerning respiratory support practices and oxygen requirements for the  
32 111 clinical management of COVID-19. Understanding of current practice and available resources in  
33 112 potential sites globally is required.  
34 113

35  
36 114 At the patient level, existing studies collect data on oxygen mode of delivery, but do not characterize the  
37 115 type, quantity and duration of each modality's use and compare transitions across devices<sup>7</sup>. At the  
38 116 facility level, existing studies describe overall hospital surge capacity but do not give an overview of  
39 117 capacities at the country, regional or global level<sup>8</sup>. Given the call for more sustained global efforts to  
40 118 better target interventions for oxygen systems in LMICs, such as through the Lancet Commission on  
41 119 medical oxygen security and others, a more succinct exploration of oxygen use in LMICs is required.<sup>9</sup>  
42 120

43  
44 121 The objectives of O2CoV2 are to: 1) characterize the type and duration of different modalities of oxygen  
45 122 therapy and respiratory support consumed by patients with severe and critical COVID-19 2) describe  
46 123 demographics and outcomes of hospitalized patients with COVID-19 and 3) describe facility level oxygen  
47 124 production capacity. All objectives are aimed to further inform a future WHO-supported platform trial  
48 125 of respiratory support strategies.  
49 126

50  
51 126  
52 127 **Methods and analysis**

53 128 STROBE cohort reporting guidelines were used.<sup>10</sup>  
54

55 129 **Study design**  
56  
57  
58  
59  
60

130 The master protocol serves to describe an observational cohort study from June 2021 through March  
 131 2023 that will be implemented in 30 countries representing four low-and-middle income countries  
 132 (LMICs) from each of the six WHO regions, and targeting up to 4 hospitals per country. LMICs will be  
 133 defined as per 2021 World Bank criteria and codes “UMC”, “LMC” and “LIC”<sup>11</sup>:  
 134

| Code | Description                                                                             |
|------|-----------------------------------------------------------------------------------------|
| HIC  | World Bank high-income economies (GNI per capita of USD 12,696 or more in 2020)         |
| UMC  | World Bank upper middle-income economies (GNI per capita of USD 4,096 - 12,695 in 2020) |
| LMC  | World Bank lower middle-income economies (GNI per capita of USD 1,046 - 4,095 in 2020)  |
| LIC  | World Bank low-income economies (GNI per capita of USD 1,045 or less in 2020)           |

135

### 136 Study site selection

137 To recruit interest in participation, WHO put out a global call for expressions of interest global clinical  
 138 research networks, social media, WHO website and WHO internal communications through headquarters,  
 139 regional offices, and country offices. An information sheet about the study was provided for public use  
 140 on WHO study website<sup>12</sup>. Expressions of interest were requested to include information about previous  
 141 experience with WHO and clinical research, research staff, and COVID-19 burden. See Annex 1.

142 Site selection was conducted by the WHO O2CoV2 International Study Steering Committee (ISSC)<sup>13</sup>.  
 143 Study sites were limited to health facilities where patients with severe and critical COVID-19 are cared  
 144 for, including hospitals and temporary COVID-19 treatment centres. The following considerations were  
 145 considered when selecting sites: WHO region of country; income status of the country (per World Bank  
 146 criteria); previous history of conducting research before; having dedicated research staff; having  
 147 identified a paired site. The African and American regions underwent sub-regional division prior to site  
 148 randomization to have at least 1 country within each subregion of the continent. Finally, EOIs were  
 149 randomized among regions.

### 150 Study population and enrolment

#### 151 Participant eligibility criteria:

- 152 1. Age greater than 12 years.
- 153 2. Suspected SARS-CoV-2 infection as determined by treating clinical provider or confirmed SARS-  
 154 CoV-2 infection confirmed virologically in the laboratory by reverse transcription polymerase  
 155 chain reaction (RT-PCR) via nasopharyngeal or oropharyngeal sample or by SARS-CoV-2 Ag-RDTs  
 156 that meet the minimum performance requirements of  $\geq 80\%$  sensitivity and  $\geq 97\%$  specificity  
 157 compared with a nucleic acid amplification test (NAAT) reference assay.
- 158 3. Admitted to health care facility within 24 hours.
- 159 4. Receiving supplemental oxygen or showing clinical evidence of need for supplemental respiratory  
 160 support as reflected in a respiratory rate  $\geq 30$  breaths per minute or an  $SpO_2 \leq 90\%$ ,  $SpO_2 < 94\%$  if  
 161 any emergency signs are present.
- 162 5. Committed to full supportive care.

163

### 164 Study procedures

#### 165 Screening

1  
2  
3 166 Patients will be screened for inclusion over a maximum of 30 days or until the site level sample size is  
4 167 met, whichever comes sooner. During the recruitment window, patients will be screened for inclusion  
5 168 in the study 24 hours per day, 7 days per week, as they enter the facility for acute care in an emergency  
6 169 unit or area of the hospital that functions like an emergency unit. An information note (see Annex 2)  
7 170 about the study will be posted at all potential areas where screening will occur; thus, informing  
8 171 potential patients that they are being screened and may be enrolled in study. A daily screening log  
9 172 (Annex 3) will be maintained to capture daily numbers of patients screened and those that are  
10 173 enrolled.  
11 174

### 13 175 **Observational period**

15 176 Patients who meet the inclusion criteria for enrolment will be visited once a day for up to 7 days for  
16 177 daily clinical data collection, or until outcome occurs, whichever happens first. Designated study data  
17 178 collector will review the patient bedside chart and observe the patient and surroundings to collect  
18 179 relevant data.

20 180 Data collection will occur daily using an electronic case report form (eCRF) and data entry platform  
21 181 (REDCap) on a WHO-provided tablet computer. See Annex 3 for all CRFs.

### 23 182 **Follow-up phase**

25 183 In cases where the patient remains in hospital more than 7 days, then the data collector will visit the  
26 184 patient each additional day until the patient hospital outcome up to 30 days maximum, to assess only  
27 185 vital status, and, at that time, complete the outcome form.

### 30 186 **Link to the platform trial**

31 187 Through the conduct of the cohort study an established dialogue with site investigators will have been  
32 188 established. For the platform trial, expressions of interest to participate in the full trial will be sought  
33 189 and a final decision will be based on site interest and site capacity as determined in this cohort study.

### 36 190 **Statistical analysis**

38 191 All analyses will be conducted in R (R: A Language and Environment for Statistical Computing, R Core Team,  
39 192 R Foundation for Statistical Computing, Vienna, Austria 2020, <https://www.R-project.org>).

### 41 193 **Missing data**

43 194 For each analysis, the denominator will represent data that are available. To impute missing data, random  
44 195 forest imputation will be considered.

### 46 196 **Sample size**

48 197 To maximise statistical power, we aim to recruit as many participants as possible. The larger the sample,  
49 198 the greater the precision and generalization of the results, and thus for descriptive analyses we aim for  
50 199 at least 125 patients per hospital, a maximum total of 4,500 patients. For inferential analyses, sample  
51 200 size estimates suggest a minimum of 1,380 patients to attain 95% statistical power to achieve  
52 201 hypotheses discussed with the ISSC.

### 54 202 **Selection bias**

55 203 To minimize selection bias, the following are introduced:



- 1  
2  
3 204 a) systematic and randomized site selection procedure (described above);  
4 205 b) specific objective criteria for participant study eligibility (described above);  
5 206 c) waiver of informed consent (see ethical considerations).  
6 207

### 208 **Outcomes**

9 209 To characterize the type and duration of different modalities of oxygen therapy and respiratory support  
10 210 consumed by patients with severe and critical COVID-19, the following outcomes will be reported:

- 11 211 • Baseline characteristics of patients;
- 12 212 • Hospital outcomes of patients;
- 13 213 • Total of patients receiving respiratory support daily and proportion of patients receiving various  
14 214 delivery devices: nasal cannula, face mask, Venturi, non-rebreather, HFNC, CPAP, bilevel positive  
15 215 airway pressure (BiPAP), non-invasive ventilation (NIV), invasive mechanical ventilation (IMV).
- 16 216 • Proportion of patients progressing to IMV.
- 17 217 • Description of respiratory support over time, with subgroup analysis by disease severity, and  
18 218 associations between facility type or patient characteristics.
- 19 219 • Quantification of total oxygen requirements will be estimated by daily oxygen use as from data  
20 220 collected on flow rates, fraction of inspired oxygen (FiO<sub>2</sub>), positive end expiratory pressure (PEEP).  
21 221

22 222 Sankey plots for patient trajectories will be used to describe the proportion and duration of each type of  
23 223 respiratory support intervention overall and in subgroup of disease severity. Multistate models will be  
24 224 used to quantify duration of stay in, and transition probabilities across, modes of respiratory support  
25 225 distinguishing absence, nasal or facial, HFNC, IMV, with death and discharge from hospital as absorbing  
26 226 states. Multivariable models will be used to predict transition to IMV or death based on patient and  
27 227 facility characteristics at the time of hospital admission. The following characteristics will be considered:  
28 228 age, chronic conditions, need for oxygen on day of transition and facility.

29 229 The amount of oxygen used for each patient will be computed using the following formulas:

- 30 230 • For nasal cannula, face mask and non-rebreather mask, FiO<sub>2</sub> is assumed to be 1.0 and flow rates  
31 231 are adjustable in litres per minute (LPM). Litres per day consumption of oxygen = device flow  
32 232 rate L/minute x 60 minutes/hr x 24 hr/day.
- 33 233 • For HFNC FiO<sub>2</sub> is adjustable (defaulted to 1.0) and flow rate is adjustable in LPM. Litres per day  
34 234 consumption of oxygen = device flow rate L/minute x 60 minutes/hr x 24 hr/day; flow rate in  
35 235 LPM = device flow rate x (FiO<sub>2</sub> - 0.21)/0.79.
- 36 236 • For ventilator, CPAP, BiPAP/non-invasive positive pressure ventilation (NIPPV), FiO<sub>2</sub> is adjustable  
37 237 (defaulted to 1.0) and flow rate is adjustable in LPM and dependent on multiple factors. Litre  
38 238 per day consumption of oxygen = device oxygen consumption rate L/minute x 60 minutes/hr x  
39 239 24 hr/day. Device oxygen consumption rate in LPM = (minute ventilation + (bias flow x RR x  
40 240 expiratory time/60) + leak) x (FiO<sub>2</sub> - 0.21)/0.79.

41 241 To describe oxygen source, distribution and biomedical equipment at facility level and estimated oxygen  
42 242 capacity at the facility level, descriptive statistics for relevant variables and quantification of total oxygen  
43 243 supply at each facility will be determined.  
44 244

45 245 Full statistical analysis plan available in Annex 4.  
46 246

### 47 247 **Study administration**

### 48 248 **Data collection and management**

1  
2  
3 249 Standardized case record forms (CRFs) are available and include:

- 4 250
- 5 251 • screening form;
  - 6 252 • case identification and demographics form;
  - 7 253 • initial case information form;
  - 8 254 • daily follow-up form (to be filled in day 2–7 or until outcome if sooner);
  - 9 255 • daily vital status form (to be filled in day 8-30 or until outcome if sooner);
  - 10 256 • case outcome form; and
  - 11 257 • facility form.

12 258 WHO will support data management and access to data entry platform REDCap, that will be stored in a  
13 259 secure WHO server housed in Geneva. The WHO team, within the capacity of research strengthening,  
14 260 will support the development of local data platforms. Implementing partners can opt to manage data on  
15 261 site or through the central WHO repository, subject to local circumstances.

16 262  
17 263 Each participant will be linked to an anonymous study ID within the REDCap database. A locally  
18 264 designated data manager will be sent a password-protected copy of the online database (anonymized  
19 265 and without any patient identifiers) for data analysis.

20 266  
21 267 For local data collection which may occur on paper, all data must be stored in a password-protected  
22 268 database or kept in a locked storage in accordance with national regulations. An identification log will be  
23 269 used, and this log will be stored in a secure, locked facility within the study country. The location of and  
24 270 responsibility for local database(s) will be determined on a case-to-case basis and dependent on  
25 271 national regulations.

26 272  
27 273 All essential study documents, including CRFs, will be electronically archived and retained at WHO for 3  
28 274 years or for the duration required by the national laws and regulations at local research centres. This is  
29 275 to enable completion of the study, to conduct and complete data curation processes, and to finalize the  
30 276 publication and archival process. The sharing of anonymized data will be done using standard WHO data  
31 277 sharing agreements (see Annex 5) with each study site.

### 32 278 33 279 **Study personnel at sites: roles and responsibilities**

- 34 280
- 35 281 • PIs at all sites will be responsible for the submission and approval process of protocols to
  - 36 282 institutions.
  - 37 283 • Study investigator team will be responsible for all aspects of protocol implementation, including
  - 38 284 screening, enrolment, daily data collection over 7 days, and follow up until hospital discharge, and
  - 39 285 facility on-time assessment.
  - 40 286 • Clinicians and hospital staff at sites will be minimally impacted as separate data collecting
  - 41 287 personnel should be hired to collect information and not directly interact in patient care.
  - 42 288 • If the above is not feasible, the potential source of bias will be acknowledged in the report. Note:
  - 43 289 excluding such sites would likely result in exclusion of sites with the most limited resources, which
  - 44 290 is the focus of the study and the trial.

45 291 WHO will serve as central coordinator of all sites and staff will support implementation of the study in all  
46 292 sites, including good clinical practice training.

47 293

1  
2  
3 294 **Patient and public involvement statement:**

4 295 As part of WHO usual practice, public and patients were engaged in the development of this protocol via  
5 296 the WHO Clinical Characterization and Management working group which led to the voluntary formation  
6 297 of the Respiratory Support Research Working Group, who edited this protocol.

8 298

9 299 **Ethics and dissemination**

10 300 **Ethics approval:** World Health Organization AdHoc Covid-19 Research Ethics Review Committee  
11 301 (CERC.0040)

13 302

14 303 **Ethics**

15 304 WHO ERC has determined that this master protocol meets the Council for International Organizations  
16 305 of Medical Sciences (CIOMS) criteria justifying a waiver of consent. When this protocol is adopted at  
17 306 specific country sites, national ERCs may make a different determination regarding consent in  
18 307 accordance with their respective national research ethics guidelines, for example, requiring modified  
19 308 consent or full individual consent as appropriate.

21 309

22 310 A waiver of consent is suggested, whereupon each study site can then consider consent exemptions  
23 311 according to national ethical review boards (ERBs). We kindly request this for the following reasons:

- 24 312 • **One, the research would not be feasible or practicable to carry out if informed consent were**  
25 313 **required.** Our objective is to understand current practice, including capacity and limitations. To do  
26 314 this reliably, we need to have rudimentary data on the entire population at risk, and not simply  
27 315 those who are able to provide consent. A biased estimate, such as would result from the  
28 316 requirement that data only be collected from patients who have provided consent, will provide an  
29 317 inaccurate picture of capacity, resources and outcomes at sites which in turn would not only  
30 318 compromise the data, but also pose potential risk to patients recruited to the trial. As well, by  
31 319 virtue of their illness, patients are often unable to provide first-party consent, and third-party  
32 320 consent is challenging because of restrictions on visiting.
- 33 321 • **Two, this research has important social value.** Understanding the nature of the challenge in  
34 322 resource-limited settings is a prerequisite to developing approaches to address these. Respiratory  
35 323 insufficiency is the dominant cause of death for patients with COVID-19, and so understanding its  
36 324 management has compelling social value.
- 37 325 • **Three, this research poses no more than minimal risks to participants.** We seek waiver of  
38 326 consent for data collection only; no specific study interventions will be undertaken. Further we  
39 327 will record only basic physiological data and location in the hospital, and not personal health  
40 328 information that might be identifying or stigmatizing. Finally, all data are anonymized, and linked  
41 329 to patient identity only through a linkage log that will be maintained **securely at study sites.**
- 42 330 • **Four, ERCs at national level will have full authority to request waiver of consent as per national**  
43 331 **protocols.**
- 44 332 • **Five, an information note will be posted in all areas where potential screening may occur.** Annex  
45 333 2 is an information note that can be posted in all areas where potential screening may occur and  
46 334 includes simple language that can be translated into local languages for local ERB approval.  
47 335

51 336 It is of the utmost importance that participant confidentiality be maintained throughout the study. This  
52 337 study will use standard methods in order to protect the confidentiality of participants. All study  
53 338 participants will be assigned a unique, pre-defined study identification number by the investigation  
54 339 team for the labelling of questionnaires for attribution of data to an individual subject and study site.

1  
2  
3 340 The study will remove all identifiers from any data collected for this study at the individual and study  
4 341 site levels. No names or other directly identifying information, including addresses or medical  
5 342 information, will be entered in the regional or global databases. Study identification numbers will be  
6 343 linked to investigator records stored separately in a secured, locked cabinet and making it possible to  
7 344 identify the case in order to correct missing or erroneous data, in accordance with institutional  
8 345 requirements.  
9 346

### 10 347 **Outputs and dissemination**

11 348 Each site will be invited to share their anonymized data for pooled analysis and will also be able to  
12 349 publish their own data independently. To protect patient identity, any publications or presentations  
13 350 relating to the study will use only aggregate summary data. Further, after obtaining agreement from  
14 351 each study site, the use of the master protocol and harmonized collection of data will allow for pooled  
15 352 analyses, which in turn will contribute to rapid knowledge generation and strengthen the power of the  
16 353 data analysis to make recommendations. Reporting forms of site-specific results is up to individual  
17 354 investigators and should follow Strengthening the Reporting of Observational Studies in Epidemiology  
18 355 (STROBE) guidelines for cohort studies and ideally be reported in such a way to allow for comparison of  
19 356 data across different study sites.  
20 357

21 358 At the global level, dissemination will be done in the standard ways to inform clinical management and  
22 359 WHO guideline development work. Findings from the global pooled analysis will be presented in reports  
23 360 and peer-reviewed publications.  
24 361

25 362 Authorship will be determined using accepted international approaches, according to International  
26 363 Committee of Medical Journal Editors recommendations  
27 364 ([http://www.icmje.org/recommendations/browse/roles-and-responsibilities/defining-the-role-of-](http://www.icmje.org/recommendations/browse/roles-and-responsibilities/defining-the-role-of-authors-and-contributors.html)  
28 365 [authors-and-contributors.html](http://www.icmje.org/recommendations/browse/roles-and-responsibilities/defining-the-role-of-authors-and-contributors.html)), commensurate to contributions made.  
29 366

### 30 367 **Author Contributions**

31 368 PR wrote the protocol with input from JD, SDR, chairs of the WHO COVID-19 clinical characterization  
32 369 management group (SR and JM), key contributors of the respiratory support research group (DA, SC),  
33 370 and chairs of the WHO International Study Steering Committee (YA, WS, PC). All other authors reviewed  
34 371 the document and made editorial suggestions.  
35 372

### 36 373 **Acknowledgements:**

37 374 \*WHO Respiratory Support Research Working Group: Neill Adhikari, Diptesh Aryal, Tim Baker,  
38 375 Devasahayam J Christopher, Rob Fowler, Martha Gartley, Ewan Goligher, Rshan Haniffa, Devachandran  
39 376 Jayakumar, Richard H Kallet, Richard Kojan, Arthur Kwizera, Jie Li, Armand Mekontso-Dessap, Christian  
40 377 Paletta, Ingrid Lara Rendon, Elisabeth Riviello, Jorge Salluh, Jonathan A C Sterne, Bruno Martins  
41 378 Tomazini, Bharath Kumar Tirupakuzhi Vijayaraghavan, Fernando Zampieri.  
42 379

43 380 \*\*WHO O2CoV2 International Study Steering Committee: Gasim Amrahli, John Appiah, Diptesh Aryal,  
44 381 Neale Batra, Kieran Bligh, Devasahayam J Christopher, Mohammed Derow, Laura Alejandra Velez Ruiz  
45 382 Gaitan, Itziar Carrasco Garcia, Bridget Griffith, Christophe Guitton, Madiha Hashmi, Rashidatu Kamara,  
46 383 Leticia Kawano-Dourado, Chiori Kodama, Richard Kojan, Gary Kuniyoshi, Arthur Kwizera, Maria Mendes,  
47  
48  
49  
50  
51  
52  
53  
54  
55  
56  
57  
58  
59  
60

1  
2  
3 384 Dina Pfeifer, Cinzia De Brito Procopio, Ingrid Lara Rendon, Ludovic Reveiz, Elisabeth Riviello, Matthieu  
4 385 Rolland, Amadou Seck, Elizabeth Stanway, Julie Viry, Pushpa Wijesinghe.

5 386

6  
7 387 **Data statement**

8 388 All study forms available in Annex 3.

9 389

10 390 **Funding statement**

11 391 This writing of this protocol received no specific grant from any funding agency in the public, commercial  
12 392 or not-for-profit sectors.

13 393

14 394 **Competing interests statement**

15 395 None declared.

16 396

17 397 **Trial registration number** Clinicaltrials.gov number NCT04918875.

1  
2  
3 398 **References**  
4 399

- 5 400 1. WHO Director-General's opening remarks at the media briefing on COVID-19 - 11 March 2020.  
6 401 2020. [https://www.who.int/director-general/speeches/detail/who-director-general-s-opening-remarks-](https://www.who.int/director-general/speeches/detail/who-director-general-s-opening-remarks-at-the-media-briefing-on-covid-19---11-march-2020)  
7 402 [at-the-media-briefing-on-covid-19---11-march-2020](https://www.who.int/director-general/speeches/detail/who-director-general-s-opening-remarks-at-the-media-briefing-on-covid-19---11-march-2020)  
8  
9 403 2. Organization WH. WHO Model List of Essential Medicines for Adults, April 2002. 2002.  
10 404 3. Organization. WH. WHO Model List of Essential Medicines for Children , October 2007. 2007.  
11  
12 405 4. Organization. WH. Biomedical equipment for COVID-19 case management - inventory tool:  
13 406 Interim guidance. 2020.  
14  
15 407 5. Organization WH. WHO Oxygen Access Scale Up Initiative.  
16 408 <https://www.who.int/initiatives/oxygen-access-scale-up>  
17 409 6. Organization WH. A Coordinated Global Research Roadmap. Global Forum on research and  
18 410 innovation for COVID-19.  
19  
20 411 7. Jaspard M, Sow MS, Juchet S, et al. Clinical presentation, outcomes and factors associated with  
21 412 mortality: A prospective study from three COVID-19 referral care centres in West Africa. *Int J Infect Dis.*  
22 413 Jul 2021;108:45-52. doi:10.1016/j.ijid.2021.05.024  
23 414 8. Barasa EW, Ouma PO, Okiro EA. Assessing the hospital surge capacity of the Kenyan health  
24 415 system in the face of the COVID-19 pandemic. *PLoS One.* 2020;15(7):e0236308.  
25 416 doi:10.1371/journal.pone.0236308  
26 417 9. Kitutu FE, Rahman AE, Graham H, et al. Announcing the Lancet Global Health Commission on  
27 418 medical oxygen security. *Lancet Glob Health.* Nov 2022;10(11):e1551-e1552. doi:10.1016/S2214-  
28 419 109X(22)00407-7  
29  
30 420 10. von Elm E, Altman DG, Egger M, et al. The Strengthening the Reporting of Observational Studies  
31 421 in Epidemiology (STROBE) Statement: guidelines for reporting observational studies. *Int J Surg.* Dec  
32 422 2014;12(12):1495-9. doi:10.1016/j.ijsu.2014.07.013  
33 423 11. New World Bank country classifications by income level: 2021-2022.  
34 424 12. Organization WH. WHO O2COV2 Information sheet for potential implementing sites.  
35 425 13. Organization. WH. International Study Steering Committee Terms of Reference.  
36  
37  
38  
39  
40  
41  
42  
43  
44  
45  
46  
47  
48  
49  
50  
51  
52  
53  
54  
55  
56  
57  
58  
59  
60

# Oxygen requirements and approaches to respiratory support in patients with COVID-19 in low- and middle-income countries: a WHO study

## Annexes

### Contents

|                                                                           |    |
|---------------------------------------------------------------------------|----|
| Annex 1. Expression of interest.....                                      | 2  |
| Annex 2. Site information sheet for public posting visibly in sites ..... | 3  |
| Annex 3. Case report form.....                                            | 4  |
| Annex 4. Statistical Analysis Plan.....                                   | 27 |
| Annex 5. Data sharing agreement.....                                      | 57 |

Peer review only

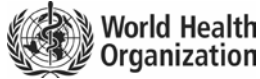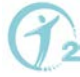

## Annex 1. Expression of interest

### WHO Respiratory support research in low- and middle-income countries: Expression of interest (to be filled by interested facilities)

The WHO Respiratory Support Research Working Group, part of the Clinical Characterization and Management of COVID-19, has developed protocols for two studies designed to address the optimal respiratory support of patients with severe COVID-19 in LMICs:

1. An observational (cohort) study to understand current practice, limitations, experience and outcomes.
2. A randomized clinical trial to test the ability of a variety of approaches to reduce mortality and the need for intubation and mechanical ventilation.

We are looking for sites who can recruit patients to both the cohort study and the trial. If you and your site are interested in being involved, please provide us with the following information:

Name: \_\_\_\_\_

Email address: \_\_\_\_\_

Site(s): \_\_\_\_\_

City/Region: \_\_\_\_\_

Country: \_\_\_\_\_

Have you/your site previously participated in clinical research?

Observational studies: Yes \_\_\_\_ No \_\_\_\_

If yes, approximate number: 1–2 \_\_\_\_ 3–5 \_\_\_\_ 6 or more \_\_\_\_

If yes, were any of the studies you participated in linked to WHO?

Yes \_\_\_\_ No \_\_\_\_

If yes which ones?

Clinical trials: Yes \_\_\_\_ No \_\_\_\_

If yes, approximate number: 1–2 \_\_\_\_ 3–5 \_\_\_\_ 6 or more \_\_\_\_

If yes, were any of the studies you participated in linked to WHO?

Yes \_\_\_\_ No \_\_\_\_

If yes which ones?

Who collects data or recruits patients at your site? (check all that apply)

Medical doctors \_\_\_\_

Nurses \_\_\_\_

Trainees \_\_\_\_

Dedicated research staff \_\_\_\_

Other \_\_\_\_

On average, how many patients with COVID-19 have you admitted monthly in the past 3 months? \_\_\_\_

May we contact you to discuss the opportunity further?

Yes \_\_\_\_ No \_\_\_\_

Any additional comments? \_\_\_\_\_

Thanks for your input.



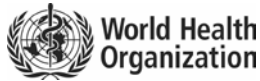

## Annex 2. Site information sheet for public posting visibly in sites

### WHO Respiratory Support Research Working Group Observational Study Information sheet for public posting at site

The World Health Organization (WHO) is conducting an observational research study of low- and middle-income country (LMIC) sites to examine baseline practices and resources for oxygen and respiratory care for patients with COVID-19.

This study will help the global community understand the current practices around oxygen use and help support a future study about advanced respiratory support interventions.

#### **This site is enrolled in this study.**

Patients who meet eligibility criteria will automatically be enrolled in the study. Eligibility criteria are:

1. Have suspected or confirmed COVID-19.
2. 12 years age or older.
3. Determined by treating clinician to require admission to facility.
4. Determined by treating clinician to require oxygen or has fast respiratory rate or low oxygen saturation.

Daily information about patients will be collected for the first 7 days of hospitalization and once again at hospital discharge. If you are discharged before 7 days, then it will be shorter. If you are hospitalized more than 7 days then you will be visited once a day until your discharge.

The types of information collected will be vital signs and details about the type of oxygen support you may be treated with such as how much oxygen are you being treated with, what kind of face mask or pressure mask is being used to give you the oxygen.

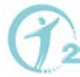

### Annex 3. Case report form

Confidential

Respiratory support observational study - Screening/Recruitment  
Page 1

#### A\_Case screening

Screening ID: \_\_\_\_\_

Date and time screening is initiated \_\_\_\_\_

Data collector username: \_\_\_\_\_

Name of data access group/facility: \_\_\_\_\_

Identifier of data access group/facility: \_\_\_\_\_

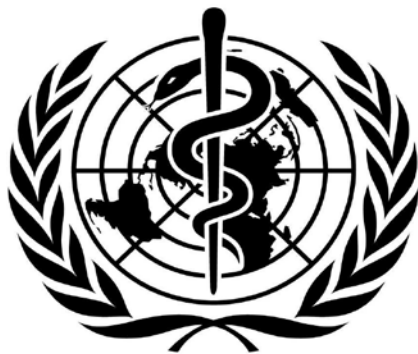

# World Health Organization

WHO O2CoV2 Screening Form

1a. How old is the patient?

(If patient is under 1 year of age, enter age as "999")

This patient is not eligible for this study. Please thank them for their time and proceed to the next patient for screening by:

Mark this form status as "Complete" Select "Save and Exit Form" Select "Create New Record"

2a. Does the patient have suspected or confirmed SARS-CoV-2 infection, as determined by treating clinical provider?

Yes  
 No

This patient is not eligible for this study. Please thank them for their time and proceed to the next patient for screening by:

Mark this form status as "Complete" Select "Save and Exit Form" Select "Create New Record"

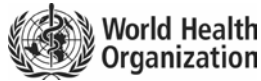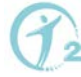

Confidential

Page 2

3a. Is this patient being admitted to the health care facility or was the patient admitted to the health care facility in the last 24 hours?

Yes

No

(Being admitted is defined as the patient being expected to stay at least overnight.)

This patient is not eligible for this study. Please thank them for their time and proceed to the next patient for screening by:

Mark this form status as "Complete" Select "Save and Exit Form" Select "Create New Record"

4a. Is the patient:

Yes

No

Receiving supplemental oxygen OR With a respiratory rate of  $\geq 30$  breaths per minute OR With a SpO<sub>2</sub>  $\leq 90\%$  on room air OR With a SpO<sub>2</sub>  $< 94\%$  and any one of the following emergency signs are present:

Obstructed or absent breathing Severe respiratory distress Central cyanosis Shock Coma and/or convulsions

This patient is not eligible for this study. Please thank them for their time and proceed to the next patient for screening by:

Mark this form status as "Complete" Select "Save and Exit Form" Select "Create New Record"

5a. Is the patient committed to full supportive care?

Yes

No

(Full supportive care is defined as the patient is amenable to advanced oxygen support, as is able to be provided at the facility.)

This patient is not eligible for this study. Please thank them for their time and proceed to the next patient for screening by:

Mark this form status as "Complete" Select "Save and Exit Form" Select "Create New Record"

This patient is eligible to be enrolled in the study. This patient should now be assigned a linking identifier and proceed to enrolment.

Please enter the patient's linking identifier below then proceed to screening the next patient by:

Mark this form status as "Complete" Select "Save & Exit Form" Select "Create New Record"

6a. Linking identifier:

(Use this field to uniquely identify the patient to the data collector who will continue with enrollment into the study.)



Confidential

Respiratory support observational study - Enrollment, Daily Data Collection, Outcome  
Page 1

## B\_Case Identification Demographics

Enrolment record ID:

\_\_\_\_\_

Data collector username

\_\_\_\_\_

Data access group name:

\_\_\_\_\_

Data access group identifier (numeric)

\_\_\_\_\_

Time of form start:

\_\_\_\_\_  
(Tap NOW when form is started.)

1b. Linking identifier:

\_\_\_\_\_  
(Use this field to uniquely identify the patient, from the data collector who screened the patient into the study.)

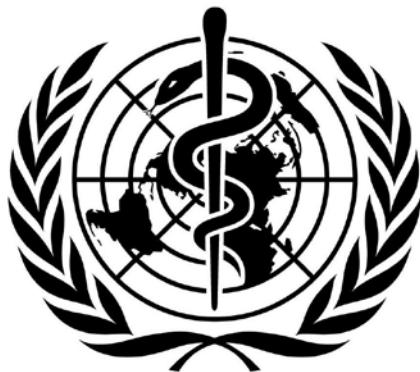

# World Health Organization

WHO O2CoV2 Enrolment Form

2b. Is the patient enrolled in the study?

Yes  
 No

This patient is not enrolled in this study. Please thank them for their time and proceed to the next patient.

3b. Please include comments or instructions on how to identify the patient for daily follow up here. Please do not write patient name or medical record/chart number.

\_\_\_\_\_

4b. Date of birth:

\_\_\_\_\_  
(Write in DD/MM/YYYY format.)

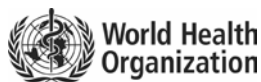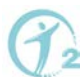

Confidential

Page 2

5b. Age (years):

Age (years) calculated

The date of birth and age provided are not equal. Please check the age and date of birth provided.

6b. Sex:

- Female  
 Male  
 Other

7b. Other sex:

8b. Height (centimetres):

{Write in centimetres without unit label.}

9b. Weight (kilograms):

{Write in kilograms without unit label.}

b. BMI

10b. Is the patient pregnant?

- Yes  
 No

11b. Date of last menstrual period:

{Write in DD/MM/YYYY format.}

### Patient's Past Medical History

12b. Chronic cardiac disease (not hypertension)

- Yes  
 No

13b. Hypertension

- Yes  
 No

14b. Chronic obstructive pulmonary disease (COPD)

- Yes  
 No

15b. Asthma

- Yes  
 No

16b. Chronic liver disease

- Yes  
 No

17b. Chronic kidney disease (moderate or severe)

- Yes  
 No

18b. Chronic neurological disease

- Yes  
 No

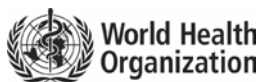

Confidential

Page 3

19b. AIDS or person living with HIV  Yes  
 No

19b. Is the patient currently on ART (antiretroviral therapy)?  Yes  
 No

20b. Diabetes mellitus  Yes  
 No

21b. Current smoking  Yes  
 No

22b. Tuberculosis (active and/or previous infection)  Yes  
 No

23b. Asplenia  Yes  
 No

24b. Cancer (any type, active in the past 6 months)  Yes  
 No

25b. Cancer (any type, greater than 6 months remission)  Yes  
 No

26b. Dementia  Yes  
 No

27b. Other  Yes  
 No

28b. Other past medical history: \_\_\_\_\_

**General Comments**

29b. Comments \_\_\_\_\_

Time of form completion: \_\_\_\_\_  
(Tap NOW when form is completed.)

Time to complete form: \_\_\_\_\_

Please mark the form status as "Complete", then select "Show More Save Options", then "Save & Go to Next Form"



Confidential

Respiratory support observational study - Enrolment, Daily Data Collection, Outcome  
Page 1

## C\_Initial case information

Enrolment record ID: \_\_\_\_\_

### Initial case information (facility arrival/emergency unit)

Time of form start: \_\_\_\_\_

(Tap NOW when form is started.)

1c. Date of arrival to this facility: \_\_\_\_\_

(Write in DD/MM/YYYY format.)

2c. Time of arrival to this facility: \_\_\_\_\_

3c. Was this patient referred or transferred from another facility?

- Yes  
 No

4c. Name of facility where patient referred or transferred from: \_\_\_\_\_

5c. Date of arrival to previous facility: \_\_\_\_\_

(Write in DD/MM/YYYY format.)

The date entered is not valid, because it is in the future. Please check the information and re-enter the date.

6c. COVID-19 status:

- Suspected  
 Confirmed

7c. Date of most recent COVID-19 positive test: \_\_\_\_\_

(Write in DD/MM/YYYY format.)

The date entered is not valid, because it is in the future. Please check the information and re-enter the date.

8c. By which method was the patient's SARS-CoV-2 infection confirmed on [date\_covid]?

- RT-PCR via nasopharyngeal or oropharyngeal sample  
 SARS-CoV-2 Ag-RDTs that meet the minimum performance requirements of  $\geq 80\%$  sensitivity and  $\geq 97\%$  specificity compared to a NAAT reference assay  
 Blood  
 Other method

9c. Other method: \_\_\_\_\_

10c. Has the patient received a COVID-19 vaccine?

- Yes  
 No  
 Unknown

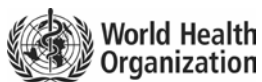

Confidential

Page 2

**General comments**

11c. Comments

Time of form completion:

{Tap NOW when form is completed.}

Please mark the form status as "Complete" then select "Show More Save Options", and select "Save & Go to Next Form" to complete the daily data (Form D1) for this patient.

Time to complete form:

1  
2  
3  
4  
5  
6  
7  
8  
9  
10  
11  
12  
13  
14  
15  
16  
17  
18  
19  
20  
21  
22  
23  
24  
25  
26  
27  
28  
29  
30  
31  
32  
33  
34  
35  
36  
37  
38  
39  
40  
41  
42  
43  
44  
45  
46  
47  
48  
49  
50  
51  
52  
53  
54  
55  
56  
57  
58  
59  
60



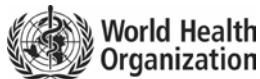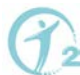

Confidential

Respiratory support observational study - Enrolment, Daily Data Collection, Outcome  
Page 1

## D1\_Daily case information (Day 1-7)

Enrolment record ID:

1d. Please select the day of data collection for which you are completing this form.

- Day 1 (day of enrolment)  
 Day 2  
 Day 3  
 Day 4  
 Day 5  
 Day 6  
 Day 7

Time of form start:

\_\_\_\_\_

{Tap NOW when form is started.}

### Daily, from hospital admission to hospital day number 7

2d. Today's date and current time:

\_\_\_\_\_

{Write in DD/MM/YYYY H:M:S format.}

3d. Location of patient:

- Emergency unit  
 Ward  
 ICU  
 Other

4d. Other location:

5d. Day and time of most recent vital signs:

\_\_\_\_\_

This day and time is not valid, because it is in the future. Please check the information and enter the correct day and time.

6d. Mental status (AVPU):

- Alert  
 Verbal  
 Pain  
 Unresponsive

7d. Systolic blood pressure (mmHg):

\_\_\_\_\_

{Write in mmHg, without unit label. Example) "70"}

8d. Oxygen saturation:

\_\_\_\_\_

{Write in %, without % symbol. Example) "70"}

9d. Heart rate (beats/minute):

\_\_\_\_\_

{Write in beats/minute, without unit label. Example) "50"}

*Confidential*

Page 2

10d. Patient positioning:

- Prone  
 Sitting (Fowler's)  
 Semi-Fowler's  
 Lateral  
 Lying flat on back

11d. Oxygen therapy modality:

- Room air  
 Nasal cannula  
 Simple face mask  
 Venturi mask  
 Non-rebreather mask  
 Hi-flow nasal cannula  
 CPAP  
 BiPAP  
 Intubated  
 Other

12d. Other oxygen therapy modality:

\_\_\_\_\_

13d. Oxygen source:

- Cylinder  
 Concentrator  
 Piped/wall oxygen  
 Other

14d. Other oxygen source:

\_\_\_\_\_

15d. Select CPAP type:

- Bubble  
 Nasal pillows  
 Helmet  
 Full face mask

16d. CPAP pressure setting:

\_\_\_\_\_

{Write in cm H<sub>2</sub>O without unit label. Example} "5"

17d. Select BiPAP type:

- Nasal pillows  
 Helmet  
 Full face mask

18d. IPAP (inspiratory positive airway pressure):

\_\_\_\_\_

{Write in cm H<sub>2</sub>O without unit label. example} "5"

19d. EPAP (expiratory positive airway pressure):

\_\_\_\_\_

{Write in cm H<sub>2</sub>O without unit label. Example} "5"

20d. Oxygen flow rate (litres/minute):

\_\_\_\_\_

{Write in litres/minute, without unit label. Example} "50"

21d. Fraction of inspired oxygen (FiO<sub>2</sub>):

\_\_\_\_\_

{Write in %, without % symbol. Example} "50"  
Reminder: FiO<sub>2</sub> of room air is 21%

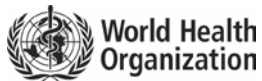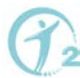

Confidential

22d. Peak airway pressure (in cm H2O):

{Write in cm H2O without unit label. Example} "50"

23d. Positive end expiratory pressure (in cm H2O):

{Write in cm H2O without unit label. Example} "5"

24d. Tidal volume (in mL):

{Write in mL without unit label. Example} "500"

25d. What is the ventilator mode?

- Volume control
- Pressure control
- Synchronized intermittent mandatory ventilation (SIMV)
- Pressure support
- Other

26d. Other ventilator mode:

27d. Leakage compensation:

- On
- Off

28d. Expiratory time:

{Provide value if available.}

29d. Respiratory rate (breaths/minute):

{Record the patient's natural rate of breathing (breaths/minute)}

30d. Respiratory rate (breaths/minute):

{Record the patient's respiratory rate as visible on machine (breaths/minute)}

31d. Take picture of brand and model number of oxygen delivery device.

{Please do not include the patient's face in the image}

32d. In the past 24 hours, has the oxygen supply system for this patient changed (new cylinder, new concentrator, etc)?

- Yes
- No

33d. In the past 24 hours, how many times has pulse oximetry been checked?

{Write in whole numbers without units.}



Confidential

Page 4

### Mortality Data

34d. Has patient died since yesterday?  Yes  
 No

35d. Date of death

\_\_\_\_\_ (Write in DD/MM/YYYY format.)

This date is not valid, because it is in the future. Please check the information and enter the correct date.

36d. What was the cause of death?  Respiratory  
 Non-respiratory  
 Not determined

### General comments

37d. Comments

\_\_\_\_\_ Please mark the form status as "Complete", then "Save & Exit Form"

After completion of this form, please:

Mark this form status as "Complete" Select "Save and Exit Form" Select Form E from the menu to complete the outcome form for this patient

\_\_\_\_\_ Please mark the form status as "Complete", then "Save & Exit Form"

Time of form completion:

\_\_\_\_\_ (Tap NOW when form is completed.)

Time to complete form:

\_\_\_\_\_



Confidential

Respiratory support observational study - Enrolment, Daily Data Collection, Outcome  
Page 1

## D2\_Daily case information (Day 8-30)

Enrolment record ID:

---

Today's date/time

---

1d. Is the patient still in the hospital?

Yes  
 No

Please mark the form status as "Complete", then "Save & Exit Form"

After completion of this form, please:

Mark this form status as "Complete" Select "Show More Save Options" Select "Save & Go to Next Form" to complete the outcome form (Form E) for this patient

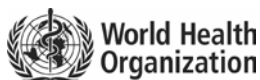

Confidential

Respiratory support observational study - Enrollment, Daily Data Collection, Outcome  
Page 1

## E\_Outcome/completion

Enrolment record ID: \_\_\_\_\_

### Study Completion Information

Time of form start:

\_\_\_\_\_  
(Tap NOW when form is started.)

1e. What is the status of the patient in the study?

- Completed
- Not completed

2e. Date of end of patient enrolment (completed or not completed)

\_\_\_\_\_  
(Write in DD/MM/YYYY format.)

This date is not valid, because it is in the future. Please check the information and enter the correct date.

3e. Reason patient did not complete study:

- Non-compliance / did not wish to continue in the study
- Left against medical advice
- Transferred
- Otherwise lost to follow up  
(Lost to follow up includes patients with unknown or unrecorded outcome.)

4e. Clinical status at hospital discharge:

- Dead
- Alive- Clinically improved
- Alive- Not clinically improved  
(Alive- Clinically improved may mean discharged to home, rehab facility, long term care facility; Alive-Not clinically improved may mean transferred to hospice or referral to other hospital.)

5e. At any point in the patient's stay, was any SARS-CoV-2 variant detected on their lab test?

- Yes
- No
- Unknown/Unable to detect SARS-CoV-2 variants at this facility

6e. If yes, which variant was detected?

- Alpha
- Beta
- Gamma
- Delta
- Other

7e. Other variant detected: \_\_\_\_\_

8e. Was the patient discharged from hospital with supplemental oxygen?

- Yes
- No



Confidential

9e. Select supplemental oxygen source[s]:

- Cylinder
  - Concentrator
  - Other
- (Check all that apply.)

10e. Other supplemental oxygen source:

\_\_\_\_\_

11e. Select oxygen delivery device[s]:

- Nasal cannula
  - Simple face mask
  - Venturi mask
  - Non-rebreather mask
  - CPAP/BiPAP
  - Other
- (Check all that apply.)

12e. Other oxygen delivery device:

\_\_\_\_\_

13e. Was the patient discharged from hospital with a pulse oximeter?

- Yes
- No

**General Comments**

14e. Comments

\_\_\_\_\_

Time of form completion:

\_\_\_\_\_ (Tap NOW when form is completed.)

Time to complete form:

\_\_\_\_\_

Please mark the form status as "Complete", then select "Save & Exit Form"



Confidential

Respiratory support observational study - Facility information  
Page 1

## F\_Facility information

Facility ID: \_\_\_\_\_

Time form started: \_\_\_\_\_  
{Press NOW when form is started.}

Name of data access group/facility name: \_\_\_\_\_

Identifier of data access group/facility name: \_\_\_\_\_

Data collector username \_\_\_\_\_

### Facility Information

1f. GPS coordinates (Latitude): \_\_\_\_\_  
{Click "update" when in facility.}

2f. GPS coordinates (Longitude): \_\_\_\_\_  
{Click "update" when in facility.}





Confidential

3f. Country:

- Argentina
  - Armenia
  - Bangladesh
  - Brazil
  - Colombia
  - Democratic Republic of Congo
  - Egypt
  - El Salvador
  - India
  - Indonesia
  - Iran
  - Jordan
  - Kazakhstan
  - Lebanon
  - Malawi
  - Mongolia
  - Nepal
  - Nigeria
  - Pakistan
  - Papua New Guinea
  - Peru
  - Philippines
  - Republic of Moldova
  - Serbia
  - South Africa
  - Thailand
  - Uganda
  - Uzbekistan
  - Viet Nam
- (Begin writing country name and select from dropdown menu.)



Confidential

Page 3

4f. Facility name:

- Cliniques Universitaires De Kinshasa
- Centre Hospitalier Monkole
- Clairwood hospital
- King Edward VIII Hospital
- Steve Biko Academic Hospital
- Tshwane District Hospital
- Federal Medical Centre Abeokuta
- General Hospital Ijaiye Abeokuta
- University of Calabar Teaching Hospital
- General Hospital Calabar
- Lira Regional Referral Hospital
- Lira University Hospital
- Hoima Regional Referral Hospital
- Entebbe Regional Referral Hospital
- Queen Elizabeth Central Hospital
- Chiradzulu Hospital
- Blantyre District Health Center
- Hospital Italiano de Buenos Aires
- Hospital Italiano de San Justo Agustin Rocca
- COVID-19 Hospital Center/Instituto Nacional de Infectologia Evandro Chagas/Fiocruz
- Family Health Primary care clinic Manguinhos
- Hospital das Clínicas of the Federal University of Pernambuco
- Centro de Pesquisa Clínica / GEP
- Clínica Colsanitas
- Puente Aranda
- Hospital Nacional El Salvador
- Hospital Nacional Zacamil
- Hospital de Huaycan
- Centro de Salud La Fraternidad
- Kafrelsheikh University
- Anesthesia and intensive care department
- Tohid hospital Sanandaj
- Kamyaran Hospital
- King Abdulla University Teaching Hospital
- Princess Basma Hospital
- Hospital 1, Lebanon
- Hospital 2, Lebanon
- Ziauddin university
- Sheikh Zayed Medical College Rahim Yar Khan
- Aga Khan University Hospital, Stadium Road, Karachi, Sindh
- Aga Khan Medical Centre, Gilgit-Baltistan
- Yerevan State Medical University after Mkhitar Heratsi, Heratsi n. 1 hospital complex
- Regional Clinical Hospital Karaganda
- Karaganda Medical University, Medical University Clinic of the NJSC
- Institute for Emergency medicine IMU, Chisinau
- Hospital for Communicable diseases
- Clinical Hospital Medical Center Bezzanijska Kosa
- Zangiata specialized clinic №2 for the treatment of patients with coronavirus infection
- Ambulance station
- Chittagong Medical College Hospital
- Chittagong General Hospital
- Cumilla Medical College Hospital
- Hospital 1, Indonesia
- Hospital 2, Indonesia
- B P Koirala Institute of Health Sciences
- Udaypur District Hospital
- Kirtipur Hospital
- Primary Health Care Center supported by Phect Nepal
- Thai Red Cross Emerging Infectious Disease Clinical Center
- King Chulalongkom Memorial Hospital
- Maharaj Nakorn Chiang Mai
- Chiang Mai Neurological Hospital

01-09-2021 08:46

For peer review only - <http://bmjopen.bmj.com/site/about/guidelines.xhtml>

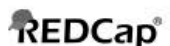

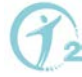

- Father Muller Medical College Hospital  
 Thumbay Speciality Rural hospital, Father Muller Salvadore Monteiro Rural health centre, Bajpe  
 JSS Medical College  
 District Hospital, Mysuru  
 National Hospital For Tropical Diseases in Hanoi  
 Bac Thang Long Hospital  
 Oxford University Clinical Research Unit  
 Hospital for Tropical Diseases and National Hospital for Tropical Diseases  
 Pacific International Hospital  
 Lae International Hospital  
 State First Central Hospital  
 General hospital of Tuv province  
 Southern Philippines Medical Center  
 Mamay Inn and TTMF facilities in the Davao Region  
 Lung Center of the Philippines  
 (Begin writing facility name and select from dropdown menu.)

5f. City:

\_\_\_\_\_  
(Write full official city name.)

6f. Facility level:

- First level hospital (District)  
 Second level hospital (Regional/provincial)  
 Tertiary level hospital (Referral/academic)  
 Other

7f. Other facility level:

\_\_\_\_\_

8f. What is the managing authority of the facility?

- Public  
 Private for profit  
 Private not for profit  
 Other  
 (Check all that apply.)

9f. Other managing authority:

\_\_\_\_\_

10f. Is electricity available 24 hours a day and 7 days a week?

- Yes  
 No

11f. Facility electricity source:

- Grid electricity connection  
 Generator  
 Solar  
 Other  
 (Check all that apply.)

12f. Other electricity source:

\_\_\_\_\_

13f. Number of total beds in facility:

\_\_\_\_\_  
(Beds = space and mattress/gurneys. Include all bed types (adult and paediatric))

*Confidential*

Page 5

14f. Number of critical care beds in facility:

{Beds = space and mattress/gurney designated for patients who are critically ill; this should include space for resuscitation and rapid provision of oxygen}

15f. Total number of ventilators in facility:

{This should include all ventilators, including invasive, non-invasive, transport and others.}

16f. Select ventilator types available to this facility:

- Invasive mechanical ventilators  
 CPAP/BiPAP  
 High flow nasal cannula (HFNC)  
 Other (including transport)  
 (Check all that apply.)

17f. Number of invasive mechanical ventilators:

\_\_\_\_\_

18f. Number of CPAP/BiPAP devices:

\_\_\_\_\_

19f. Number of high flow nasal cannula (HFNC) devices:

\_\_\_\_\_

20f. Number of other ventilators (including transport):

\_\_\_\_\_

21f. Is the facility capable of testing or receiving testing information on SARS-CoV-2 variants?

- Yes  
 No  
 Unknown

22f. Number of biomedical experts (biomedical engineers/clinical engineers/technicians):

{Biomedical experts are professionals who have been trained in the setup, use, maintenance, and troubleshooting of medical devices.}

23f. Number of clinicians who can manage respiratory failure (intubation, mechanical ventilation, management of complications, etc):

{These clinicians may be doctors or nurses who have specialty training in ICU, anaesthesia, emergency medicine, etc.}

For the following questions, please refer to this image of oxygen supply types.

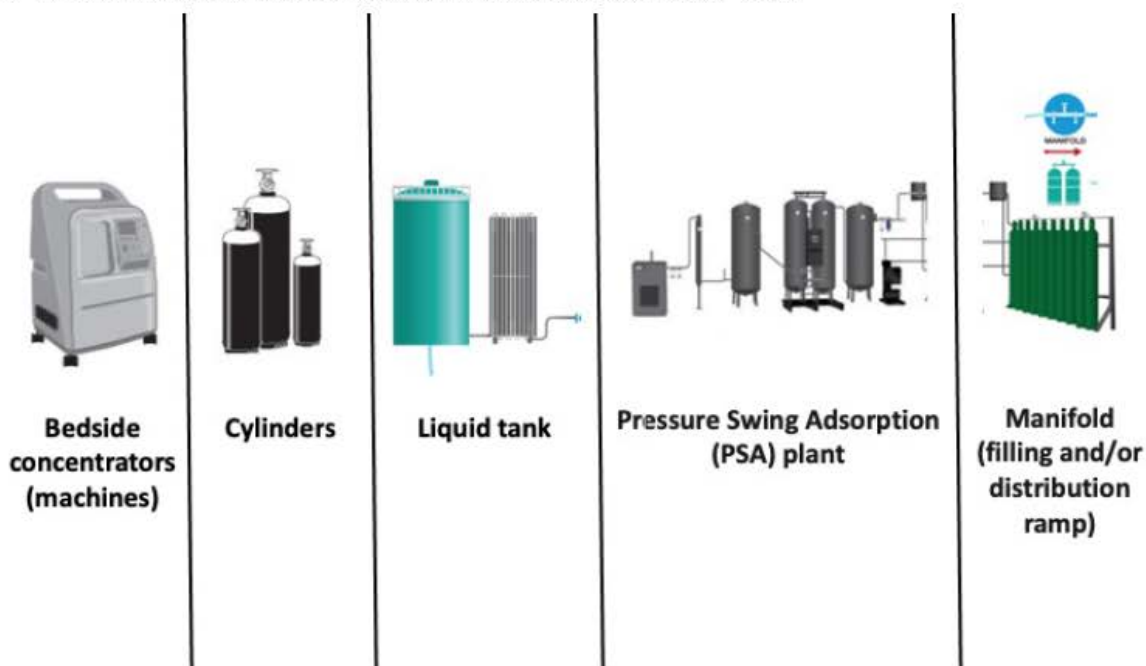

24f. Which of the following oxygen supply systems are present in the facility?

- Bedside concentrators (machines)
  - Cylinders
  - Liquid tank system
  - Piping
  - PSA system
  - Manifold (filling and/or distribution ramp)
  - Other
- (Check all that apply.)

25f. Other oxygen supply system:

\_\_\_\_\_

26f. How many concentrators are in the hospital?

\_\_\_\_\_

27f. What capacity do the concentrators have in litre/minute (L/min)?

- 5 L/min
  - 8 L/min
  - 10 L/min
  - Other
- (Check all that apply.)

28f. Other capacity:

\_\_\_\_\_ (Write in litres/min.)

29f. Are cylinders filled on site or off site?

- On-site
  - Off-site
- (Check all that apply.)

For the following question, please refer to this image of an oxygen outlet:

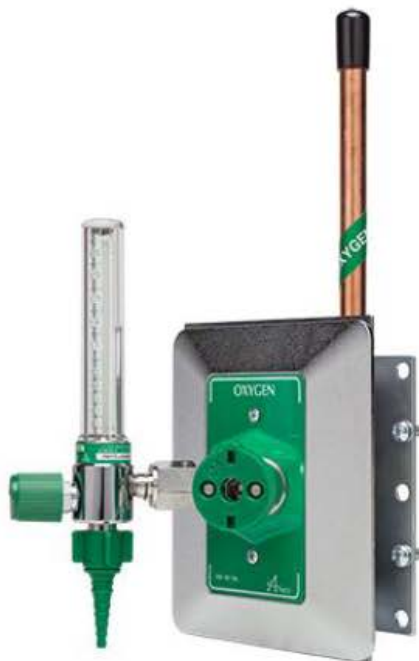

30f. How many oxygen outlets are there per bed?

{See image above for reference. The color of the oxygen outlet may differ in your country/region.}

31f. What oxygen source is the piping connected to?

- PSA system
  - Liquid tank system
  - Manifold (distribution ramp)
- {PSA=Pressure Swing Adsorption. Check all that apply.}

For the following question, please refer to this image of an oxygen plant:

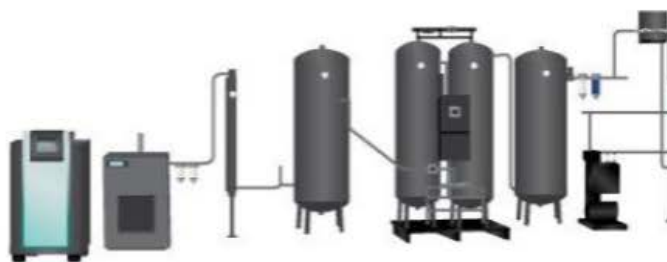

*Confidential*

Page 8

32f. What is the PSA system configuration?

- Single oxygen generator plants  
 Duplex oxygen generator plants  
 Triplex oxygen generator plants  
 Other

(Single generator plants will have a single configuration including only one booster and set of tanks, as in the photo depicted. Duplex generator plants will have two configurations in parallel, including two boosters and set of tanks. These configurations may join at an air compressor junction. Triplex generator plants will have three configurations in parallel, including three boosters and set of tanks. These configurations may join at an air compressor junction.)

33f. Other PSA system configuration:

34f. What is the oxygen production capacity of the PSA system?

( If applicable, write the production capacity of each oxygen generator plant, separated with a semicolon (;). Write number[s] without units.)

35f. Indicate if the oxygen production capacity is recorded in metres cubed/hour(m<sup>3</sup>/hr) or litres/minute(L/min):

- metres cubed/hour (m<sup>3</sup>/hr)  
 litres/minute (L/min)

36f. What is the quantity of liquid oxygen contracted for the facility per month?

(Write in whole numbers without units.)

37f. Indicate if the quantity of liquid oxygen is recorded in tons/month, metres cubed(m<sup>3</sup>)/month, or litres/month:

- tons/month  
 metres cubed (m<sup>3</sup>)/month  
 litres/month

38f. Is the PSA plant active 24 hours per day and 7 days per week?

- Yes  
 No  
 (Passive Swing Adsorption (PSA) - generation of enriched oxygenation from ambient air)

39f. How many days per week does the PSA plant function?

(Write number of days without unit label.)

40f. How many hours per day does the PSA plant function?

(Write in number of hours without unit label.)



Confidential

Page 9

For the following questions, please refer to this image of sizes of oxygen cylinders.

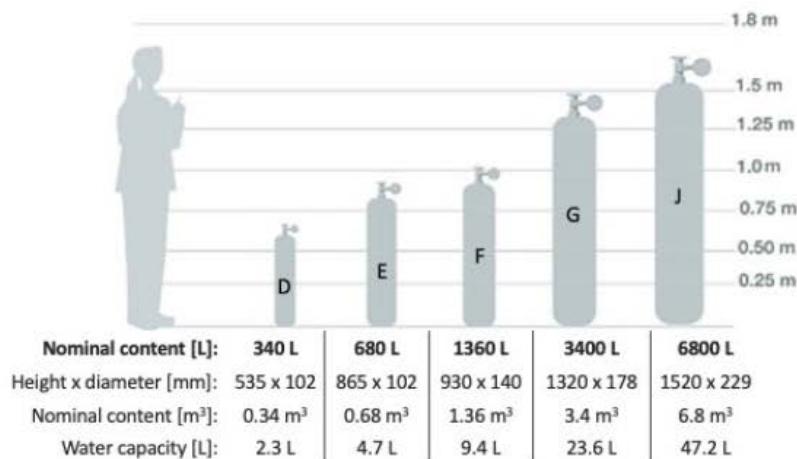

WHO-UNICEF technical specifications and guidance for oxygen therapy devices:  
[http://www.who.int/medical\\_devices/en/11/11000/tech\\_specs\\_oxygen\\_therapy\\_devices/en/](http://www.who.int/medical_devices/en/11/11000/tech_specs_oxygen_therapy_devices/en/)

41f. What is the monthly consumption of 340 litre cylinders?

{See above image for reference. Enter number of cylinders. Example: 4. If you do not have this cylinder size, write 0.}

42f. What is the monthly consumption of 680 litre cylinders?

{See above image for reference. Enter number of cylinders. Example: 4}

43f. What is the monthly consumption of 1360 litre cylinders?

{See above image for reference. Enter number of cylinders. Example: 4}

44f. What is the monthly consumption of 3400 litre cylinders?

{See above image for reference. Enter number of cylinders. Example: 4}

45f. What is the monthly consumption of 6800 litre cylinders?

{See above image for reference. Enter number of cylinders. Example: 4}



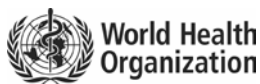

World Health  
Organization

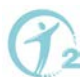

## Annex 4. Statistical Analysis Plan

# Statistical analysis plan

---

Oxygen requirements and approaches to respiratory support  
in patients with COVID-19 in low- and middle-income  
countries:  
a WHO study

---

VERSION 2.5  
7 December 2022

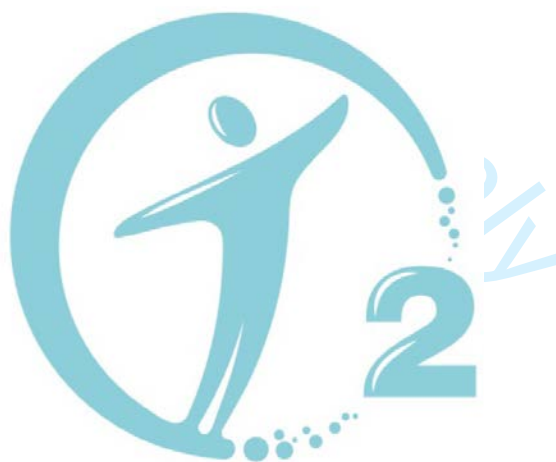



## Contents

|                                                       |                              |
|-------------------------------------------------------|------------------------------|
| <b>Version control</b>                                | <b>29</b>                    |
| <b>Acknowledgements</b>                               | Error! Bookmark not defined. |
| <b>Abbreviations</b>                                  | <b>30</b>                    |
| <b>1. Introduction</b>                                | <b>31</b>                    |
| <b>Plan objective</b> .....                           | <b>31</b>                    |
| <b>Study characteristics</b> .....                    | <b>31</b>                    |
| <b>2. Objectives of the analysis</b>                  | <b>32</b>                    |
| <b>Overall aim of the study</b> .....                 | <b>32</b>                    |
| <b>Primary objectives</b> .....                       | <b>32</b>                    |
| Objective 1.1                                         | 32                           |
| Objective 1.2                                         | 32                           |
| <b>Secondary objectives</b> .....                     | <b>32</b>                    |
| Objective 2.1                                         | 32                           |
| Objective 2.2                                         | 33                           |
| Objective 2.3                                         | 33                           |
| Objective 2.4                                         | 33                           |
| <b>3. Endpoints</b>                                   | <b>33</b>                    |
| <b>Study endpoints for primary objectives</b> .....   | <b>33</b>                    |
| <b>Study endpoints for secondary objectives</b> ..... | <b>33</b>                    |
| <b>4. Statistical methods for specific objectives</b> | <b>34</b>                    |
| <b>Primary objectives</b> .....                       | <b>34</b>                    |
| Summary descriptive                                   | 34                           |
| Respiratory support transitions                       | 34                           |
| <b>Secondary objectives</b> .....                     | <b>35</b>                    |
| <b>5. Missing data</b>                                | <b>45</b>                    |
| <b>6. Sample size</b>                                 | <b>45</b>                    |
| <b>7. Statistical software</b>                        | <b>56</b>                    |
| <b>References</b>                                     | <b>56</b>                    |

## Version control

| Version | Approval date     | Important changes from previous version                                                                                                                                                                                            | Initials |
|---------|-------------------|------------------------------------------------------------------------------------------------------------------------------------------------------------------------------------------------------------------------------------|----------|
| 1.0     | 15 September 2021 | Initial version                                                                                                                                                                                                                    | SDR      |
| 1.1     | 24 January 2022   | Include more states in the multistate model and sample size recalculation                                                                                                                                                          | SDR      |
| 2.0     | 23 February 2022  | Recalculate sample size and harmonize objectives with research protocol version 5.2, 20 February 2022                                                                                                                              | SDR      |
| 2.2     | 6 July 2022       | Include the scenario of facility level variables as confounders                                                                                                                                                                    | SDR      |
| 2.3     | 27 October 2022   | Recalculate sample size including percentage ICU beds as covariate and correcting GPower input parameters. Include power analysis. Added the two Cox proportional hazard models (patient level and facility level characteristics) | MR       |
| 2.4     | 25 November 2022  | Adjust figures according to suggestions made by copyeditor                                                                                                                                                                         | MR       |
| 2.5     | 7 December 2022   | Final technical edit                                                                                                                                                                                                               | PR       |

Notes: Sara Domínguez Rodríguez (SDR): Lead biostatistician (September 2021 – July 2022)

Matthieu Rolland (MR): Lead biostatistician (July 2022 – present)

Pryanka Relan: Global study focal point (2020 – present)

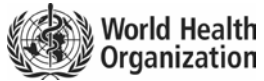

## Abbreviations

|                  |                                            |
|------------------|--------------------------------------------|
| BiPAP            | bilevel positive airway pressure           |
| CI               | confidence interval                        |
| COVID-19         | SARS-CoV-2 coronavirus disease             |
| CPAP             | continuous positive airway pressure        |
| DSMB             | Data and Safety Monitoring Board           |
| FiO <sub>2</sub> | fraction of inspired oxygen                |
| HFNC             | high-flow nasal cannula                    |
| HR               | <b>hazard ratio</b>                        |
| ICU              | <b>intensive care unit</b>                 |
| IMV              | invasive mechanical ventilation            |
| IQR              | interquartile range                        |
| LMICs            | low- and middle-income countries           |
| LPM              | litres per minute                          |
| LR               | logistic regressions                       |
| NIPPV            | non-invasive positive pressure ventilation |
| NIV              | non-invasive ventilation                   |
| OR               | odds ratio                                 |
| PEEP             | positive end-expiratory pressure           |
| RR               | respiratory rate                           |
| SAP              | statistical analysis plan                  |
| SD               | standard deviation                         |
| SpO <sub>2</sub> | peripheral oxygenation saturation          |

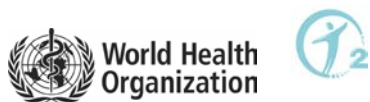

## 1. Introduction

### Plan objective

This statistical analysis plan (SAP) provides a detailed and comprehensive description of the main, pre-planned analysis for the study “Oxygen requirements and approaches to respiratory support in patients with COVID-19 in low- and middle-income countries: a WHO study”. This study has been undertaken by an international research consortium and is fully described in the research protocol version 5.2, 20 February 2022.

This SAP contains a detailed description of data summaries and presentations of statistical results. Major changes in the statistical methodology used for the main and pre-planned analyses would, however, require amendment and re-approval of this SAP by the research consortium and study Data and Safety Monitoring Board (DSMB) or a detailed description and justification in the statistical analysis report.

### Study characteristics

The severe acute respiratory syndrome coronavirus 2 (SARS-CoV-2) has been identified as the cause of a respiratory illness, officially named COVID-19. COVID-19 was described as a pandemic on 11 March 2020.

It is estimated that approximately 20% of those infected with COVID-19 require oxygen supportive therapy. Oxygen is an essential medicine and has been listed as such on the WHO Essential Medicines List and Essential Medicines List for Children. Still, the availability of supplemental medical oxygen in low- and middle-income countries (LMICs) remains a challenge. The COVID-19 pandemic has highlighted, more than ever, the acute need for scale-up of oxygen therapy. WHO has provided an inventory tool to quantify facility-level provision of infrastructure to deliver oxygen therapy. Detailed data on the use of oxygen therapy in LMICs at the patient level remain lacking.

In February 2020, the Research and Development Blueprint for COVID-19 identified key research areas needed for understanding this new disease. Clinical research, including that specifically on the types of respiratory support required by patients, was identified as a key research priority. Since mid 2020, the WHO COVID-19 Clinical Characterization and Management Research Group has been developing two research protocols to support the understanding of respiratory support practices and oxygen requirements for the clinical management of COVID-19.



- The first is an observational study to describe oxygen requirements and respiratory support practices in facilities caring for patients with COVID-19 in LMICs.
- The second is an interventional platform trial which seeks to compare modalities of respiratory support (e.g. continuous positive airway pressure [CPAP], high-flow nasal cannula [HFNC], awake prone position, and other interventions?).

Selection of the most relevant interventions requires an understanding of current practice and expertise in sites that might recruit patients to the trial. Existing studies collect data on oxygen mode of delivery but do not characterize the type, quantity and duration of each modality's use at the patient level, to give a better understanding of oxygen therapy modalities in current use in LMICs.

## 2. Objectives of the analysis

### Overall aim of the study

To describe oxygen use, requirements and respiratory support interventions at the facility level in LMICs. This information will be used to further inform a future platform trial of respiratory support strategies.

### Primary objectives

#### Objective 1.1

Characterize the type and duration of different modalities of oxygen therapy and respiratory support delivered to patients with severe and critical COVID-19.

#### Objective 1.2

To quantify the duration of stay in, describe practice patterns and transition probabilities across, modes of respiratory support, distinguishing absence, nasal or facial, HFNC, invasive mechanical ventilation (IMV), with death and discharge from hospital as absorbing states.

### Secondary objectives

#### Objective 2.1

To quantify the amount ( $m^3$ ) of oxygen delivered to patients with severe and critical COVID-19.



## Objective 2.2

To describe the demographics and outcomes at hospital discharge of this cohort of hospitalized patients. For this, we will collect minimal demographic information (age, sex, chronic disease and pregnancy), daily oxygen saturation (SpO<sub>2</sub>) and respiratory rate (RR), and outcome data at hospital discharge.

## Objective 2.3

To describe the resources at the facility level for oxygen delivery and respiratory support. For this, we will collect basic facility-level information about oxygen production, distribution and biomedical equipment availability using the WHO Biomedical Inventory Tool.

## Objective 2.4

To describe the impact of facility resources on outcome at hospital discharge. For this, we will collect facility-level information on: electricity, biomedical staff, clinical staff who can manage respiratory failure.

## 3. Endpoints

### Study endpoints for primary objectives

- Total number of patients receiving respiratory support daily and proportion of patients receiving various delivery devices: nasal cannula, face mask, Venturi, non-rebreather, HFNC, CPAP, bilevel positive airway pressure (BiPAP), non-invasive ventilation (NIV), IMV (Objective 1.1).
- The proportion of patients with each of the respiratory supports over the 7 days of follow-up, with subgroup analysis by disease severity, and associations between facility type or patient characteristics (Objective 1.2).

### Study endpoints for secondary objectives

- Quantification of total oxygen delivered will be estimated by daily oxygen use for each patient from data collected on flow rates, the fraction of inspired oxygen (FiO<sub>2</sub>), positive end-expiratory pressure (PEEP) (Objective 2.1).



World Health  
Organization



- Quantification of total oxygen supply among the 7 days of follow-up stratified by type of device (low-flow oxygen therapy, HFNC, NIV/CPAP and IMV), and region (African, Americas, South-East Asia, European, Eastern Mediterranean and Western Pacific) (Objective 2.1).
- Demographics and outcome characteristics at hospital discharge (Objective 2.2).
- Facility-level information about oxygen production, distribution, biomedical equipment availability (Objective 2.3) and electricity, biomedical staff and clinical staff who can manage respiratory failure (Objective 2.4).

## 4. Statistical methods for specific objectives

### Primary objectives

#### Summary descriptive

In order to describe the study sample, baseline characteristics and output overall, columns will be included to summarize all subjects within the study (Objective 1.1). In summary tables of continuous variables, interquartile ranges (IQR) and medians will be assessed. In summary tables of categorical variables, counts and percentages will be used. The denominator for each percentage will be the number of subjects within the population group excluding missing observations unless otherwise specified. See **Table 1** and **Table 2** for descriptions of admission characteristics. Chi-squared and Fisher Tests will be performed for categorical variables. For normally distributed continuous variables, the Student T-test will be performed and non-parametric tests such as U-Mann Whitney or Kruskal Wallis when non-normally distributed. All hypothesis testing will be carried out at the 5% significance level and *P* values will be rounded to three decimal places. In summary tables, *P* values less than 0.001 will be reported as < 0.001 as implemented in compareGroups R package (1).

#### Respiratory support transitions

To describe the changes in respiratory support over time (Objective 1.2), Sankey plots will be used to describe patient trajectories, describing the proportion and duration of each type of respiratory support. Kaplan-Meier models will be used to estimate the



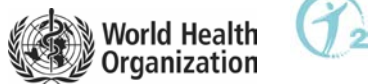

probability of each transition during the follow-up time of the study. The hospital outcomes and time to event outcomes will be described in **Table 3**.

A multistate model will be used to study the course of hospital stay of the study population. The focus of the analysis will be on evaluating transitions of escalating respiratory support and transitions to the absorbing states. Multistate models are structures that represent different disease categories or states and the movement of patients between these states (transitions). In this model, summarized in **Fig. 1**, patients may enter the study in one of the three initial transient states: State A: No oxygen therapy or standard oxygen therapy (nasal cannula, face mask or non-rebreather mask); State B: HFNC, NIV or CPAP; and State C: IMV. The model will also include two absorbing states from which a patient no longer transitions: discharge alive and recover (State D) and dead (State E). From State A, a patient can either transition to State B (HFNC/NIV/CPAP), State C (IMV), discharge/recover, or die. From State B (HFNC/NIV/CPAP), a patient can transition into IMV, discharge, or die. From State C (IMV), a patient can transition to discharge/recover or die. Formally the course of a patient's stay is described with a time-in homogeneous Markov chain given by  $\{X(t), t \geq 0\}$  with finite state space  $S = \{1, 2, 3, 4, 5, 6, 7, 8, 9\}$  and follow-up time  $\tau$ .  $X(t)$  denotes the state occupied at time  $t$ . Various estimands are of interest. We will define the probability to move from one state to another within the multistate model. To perform this multistate model, the *mstate* R package(2) will be used to estimate the transition and state occupation probabilities for patients over the course of their hospital stay. The *mstate* package employs Aalen-Johansen estimator based on Markov assumptions.

A multivariable regression model will be used to predict each transition based on the following characteristics: age, gender, vaccination and comorbidities at the time of hospital admission, SpO<sub>2</sub> on the day of the transition, the percentage of intensive care unit (ICU) beds in the facility, and a random intercept at the facility level. The output of the multistate model will be summarized using a forest plot as in **Fig. 2** describing the hazard ratios (HR) and 95% of confidence interval (CI) for each baseline covariate in each transition. Stacked transition probabilities at 7 days after admission will be plotted.

## Secondary objectives

The amount of oxygen used for each patient will be computed using the following formula:

- For nasal cannula, face mask and non-rebreather mask, FiO<sub>2</sub> is assumed to be 1.0 and flow rates are adjustable in litres per minute (LPM). Litres per day consumption of oxygen = device flow rate L/minute x 60 minutes/hr x 24 hr/day.



- For HFNC  $FiO_2$  is adjustable (defaulted to 1.0) and flow rate is adjustable in LPM. Litres per day consumption of oxygen = device flow rate L/minute x 60 minutes/hr x 24 hr/day; flow rate in LPM = device flow rate x  $(FiO_2 - 0.21)/0.79$ .
- For ventilator, CPAP, BiPAP/non-invasive positive pressure ventilation (NIPPV),  $FiO_2$  is adjustable (defaulted to 1.0) and flow rate is adjustable in LPM and dependent on multiple factors. Liter per day consumption of oxygen = device oxygen consumption rate L/minute x 60 minutes/hr x 24 hr/day. Device oxygen consumption rate in LPM = (minute ventilation + (bias flow x RR x expiratory time/60) + leak) x  $(FiO_2 - 0.21)/0.79$ .

This amount of oxygen used for each patient will then be summarized according to oxygen modality, severity and region, as in **Fig. 3**. Different panels will be displayed for box plots summarizing medians and IQR. Comparisons between each stratum will be done using the Kruskal Wallis test (Objective 2.1). Baseline characteristics and overall output columns will be included to summarize all subjects at discharge. In summary tables of continuous variables, IQR and medians will be assessed. In summary tables of categorical variables, counts and percentages will be used. The denominator for each percentage will be the number of subjects within the population group without taking into account missing observations unless otherwise specified. Chi-squared and Fisher Tests will be performed for categorical variables. For normally distributed continuous variables, the Student T-test will be performed and U-Mann Whitney or Kruskal Wallis when non-parametric. All hypothesis testing will be carried out at the 5% significance level and *P* values will be rounded to three decimal places (Objective 2.2). An additional multivariate Cox proportional hazard model will be performed where the outcome is time to death, and the covariates are age, gender, vaccination, comorbidities and  $SpO_2$  at the time of hospital admission, the percentage of ICU beds in the facility, and a random intercept at the facility level. All these covariates will be included in the model and no variable selection process will be performed, as these covariates were all identified as being clinically relevant (Objective 2.2). To describe the oxygen source, distribution, biomedical equipment and oxygen capacity at the facility level, data will be displayed as a whole and summarized by each region and level of facility (Objective 2.3). See **Table 4** for descriptions of oxygen supply at each facility. In summary tables, *P* values less than 0.001 will be reported as < 0.001, as implemented in compareGroups R package (1). To assess the impact of facility-level resources, a multivariate Cox proportional hazard model will be performed where the outcome is time to death, and where the covariates will include: electricity, biomedical staff and clinical staff who can manage respiratory failure. All these covariates will be included

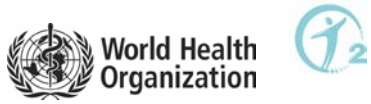

1  
2  
3  
4 in the model and no variable selection process will be performed, as these covariates were  
5 all identified as being clinically relevant (Objective 2.4).  
6  
7  
8  
9  
10  
11  
12  
13  
14  
15  
16  
17  
18  
19  
20  
21  
22  
23  
24  
25  
26  
27  
28  
29  
30  
31  
32  
33  
34  
35  
36  
37  
38  
39  
40  
41  
42  
43  
44  
45  
46  
47  
48  
49  
50  
51  
52  
53  
54  
55  
56  
57  
58  
59  
60

For peer review only

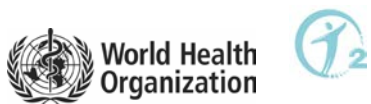

Fig. 1. Multistate model

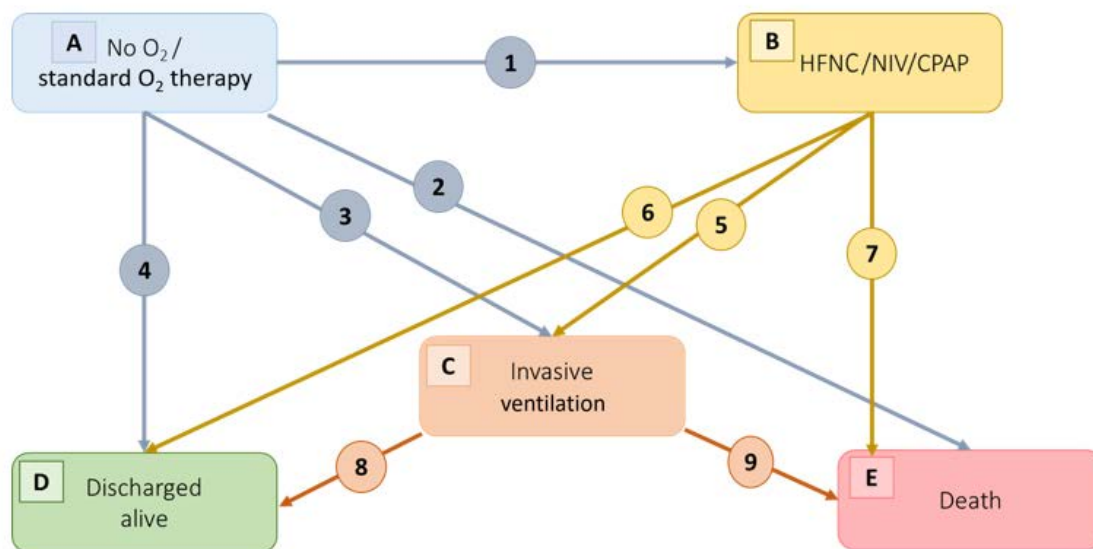

Peer review only



Fig. 2. Output from the multistate model

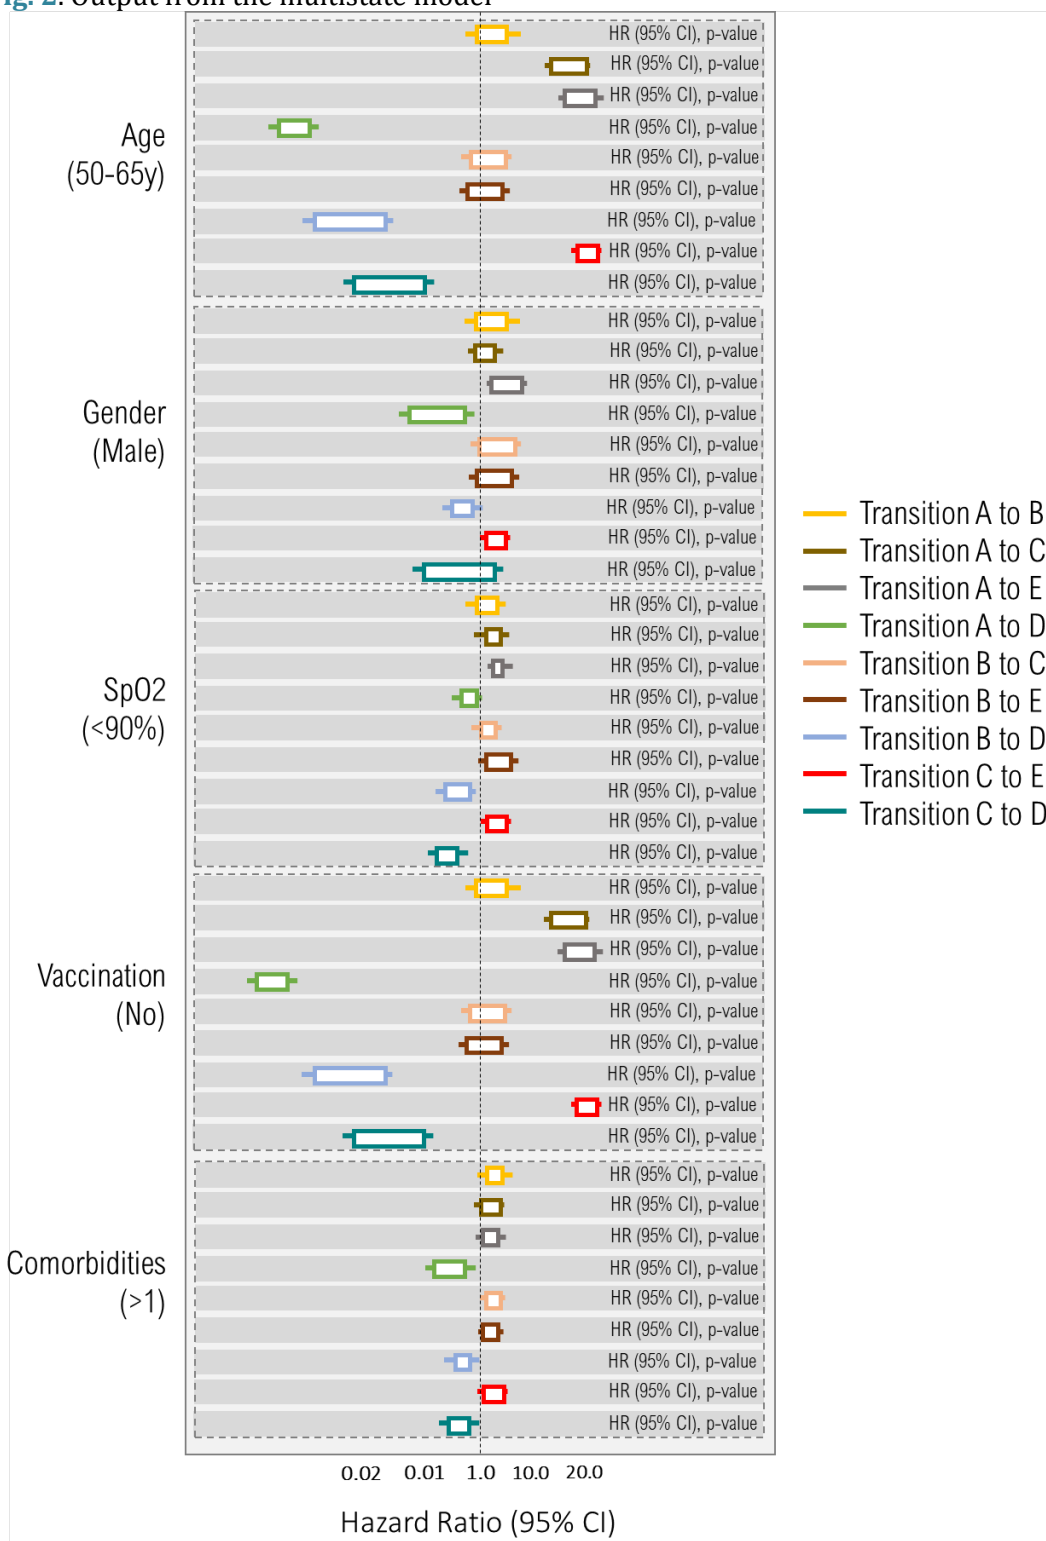

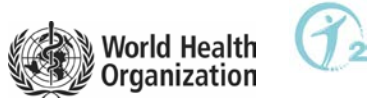

**Fig. 3.** Amount of oxygen according to oxygen modality, severity and region

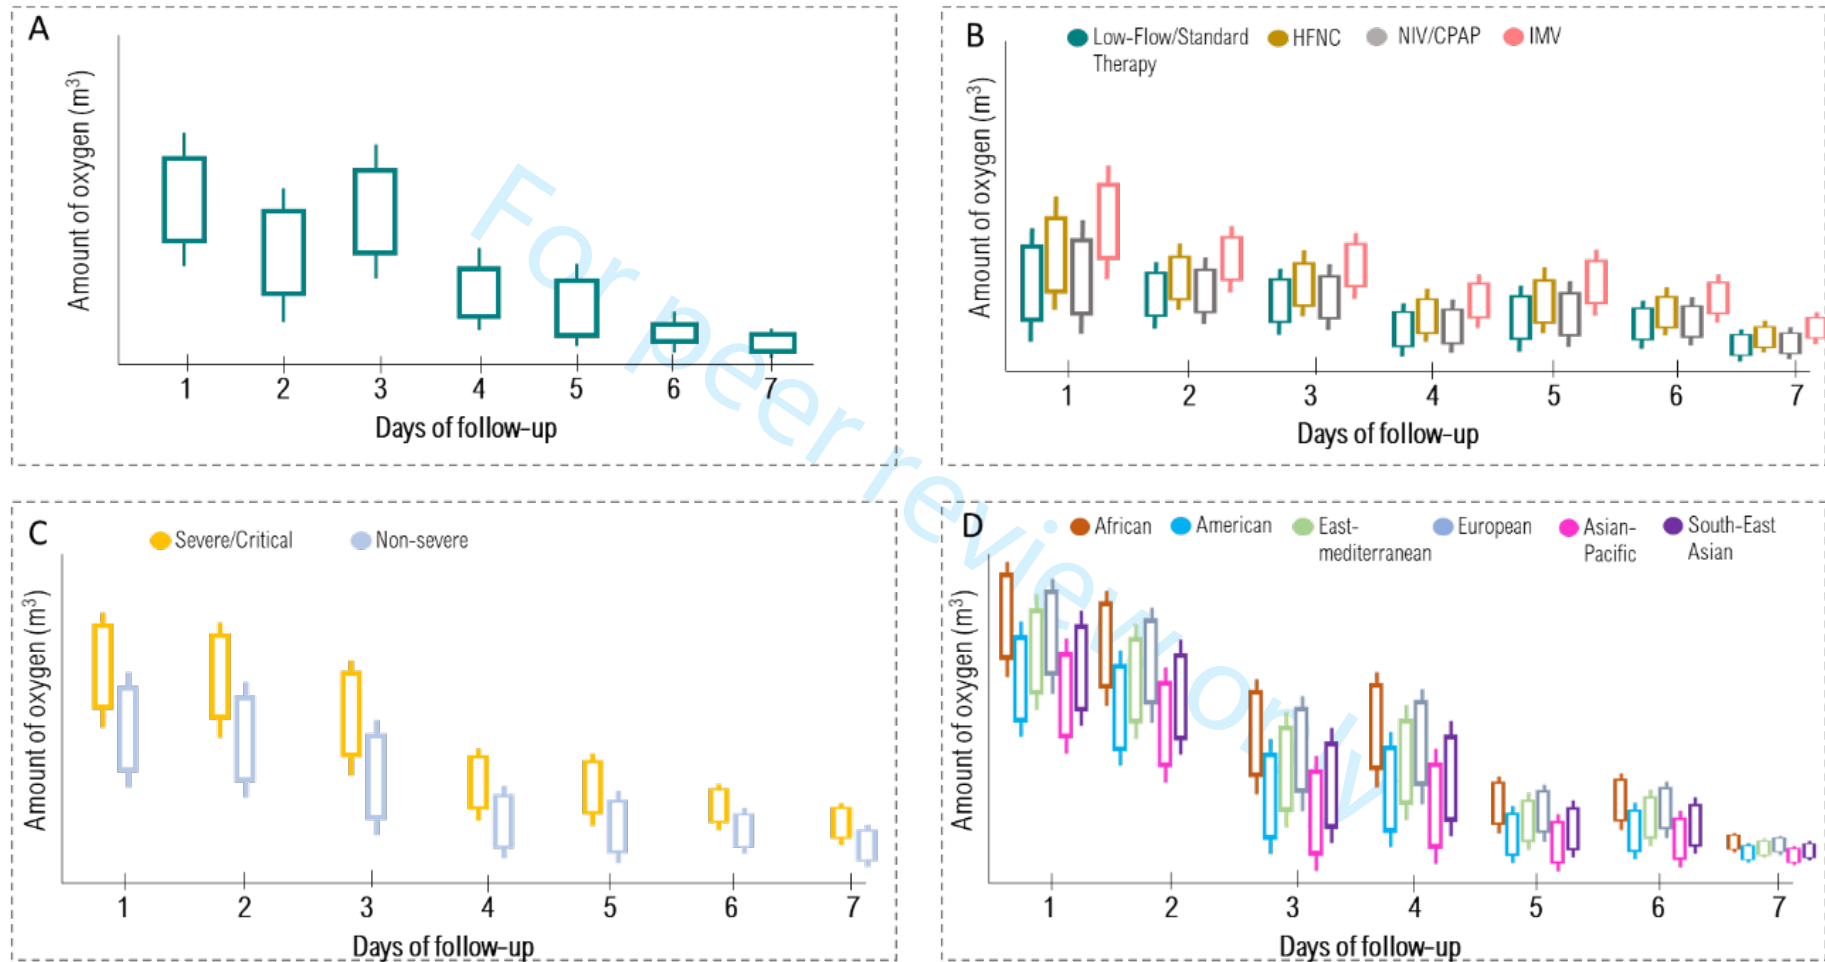

**Table 1.** Characteristics at admission

| Variable                                                   | Overall N = |
|------------------------------------------------------------|-------------|
| <b>Age</b>                                                 |             |
| Years (median, IQR)                                        |             |
| 13–17 years                                                |             |
| 18–49 years                                                |             |
| 50–69 years                                                |             |
| ≥ 70 years                                                 |             |
| <b>Gender</b>                                              |             |
| Female (n, %)                                              |             |
| <b>Pregnancy status</b>                                    |             |
| Yes (n, %)                                                 |             |
| <b>Admission vital signs</b>                               |             |
| <b>Heart rate bt/min (median, IQR)</b>                     |             |
| > 100 bt/min (n, %)                                        |             |
| > 120 bt/min (n, %)                                        |             |
| <b>Respiratory rate b/min (median, IQR)</b>                |             |
| > 20 breaths/min (n, %) (adults)                           |             |
| > 40 breaths/min (n, %) (children)                         |             |
| <b>Blood pressure mmHg (median, IQR)</b>                   |             |
| > 140 mmHg (n, %) (adults)                                 |             |
| <b>Oxygen saturation (median, IQR)</b>                     |             |
| < 90% (n, %)                                               |             |
| < 94% (n, %)                                               |             |
| <b>Mental status</b>                                       |             |
| Alert (n, %)                                               |             |
| Verbal (n, %)                                              |             |
| Pain (n, %)                                                |             |
| Unresponsive scale (AVPU) (n, %)                           |             |
| <b>Height (cm)</b>                                         |             |
| <b>Weight (kg)</b>                                         |             |
| <b>Body mass index (BMI)</b>                               |             |
| > 30 (n, %)                                                |             |
| > 40 (n, %)                                                |             |
| <b>Chronic conditions</b>                                  |             |
| None (n, %)                                                |             |
| Chronic cardiac disease (n, %)                             |             |
| Hypertension (n, %)                                        |             |
| Chronic obstructive pulmonary disease (n, %)               |             |
| Asthma (n, %)                                              |             |
| Chronic liver disease (n, %)                               |             |
| Dementia (n, %)                                            |             |
| Chronic neurological disease (n, %)                        |             |
| Human immunodeficiency virus (HIV) (n, %)                  |             |
| Not on ART (n, %)                                          |             |
| Diabetes (n, %)                                            |             |
| Current smoking (n, %)                                     |             |
| Tuberculosis (n, %)                                        |             |
| Asplenia (n, %)                                            |             |
| Cancer (n, %)                                              |             |
| <b>Pathogen testing at any time during hospitalization</b> |             |
| Variant Alpha (n, %)                                       |             |
| Variant Beta (n, %)                                        |             |
| Variant Gamma (n, %)                                       |             |
| Variant Delta (n, %)                                       |             |
| Variant Omicron (n, %)                                     |             |
| Other                                                      |             |
| Unknown (n, %)                                             |             |
| <b>Vaccination status</b>                                  |             |
| Vaccinated (n, %)                                          |             |

**Table 2.** Respiratory support at hospitalization

| Variable                                               | Overall N = |
|--------------------------------------------------------|-------------|
| <b>Respiratory and critical care interventions</b>     |             |
| <b>Prone position</b>                                  |             |
| Prone (n, %)                                           |             |
| Sitting (fowlers) (n, %)                               |             |
| Semi-fowlers (n, %)                                    |             |
| Lateral (n, %)                                         |             |
| Lying flat on back (n, %)                              |             |
| <b>Oxygen therapy</b>                                  |             |
| <b>Flow</b>                                            |             |
| 1–5 LPM (n, %)                                         |             |
| 6–10 LPM (n, %)                                        |             |
| 11–15 LPM (n, %)                                       |             |
| > 15 LPM (n, %)                                        |             |
| <b>Fraction of inspiring oxygen (%)</b>                |             |
| Median [IQR]                                           |             |
| <b>Peal airway pressure (cm)</b>                       |             |
| Median [IQR]                                           |             |
| <b>Positive end-expiratory pressure (cm)</b>           |             |
| Median [IQR]                                           |             |
| <b>Respiratory rate (breaths/min)</b>                  |             |
| Median [IQR]                                           |             |
| <b>Source of oxygen</b>                                |             |
| Cylinder (n, %)                                        |             |
| Concentrator (n, %)                                    |             |
| Piped/wall oxygen (n, %)                               |             |
| Other (n, %)                                           |             |
| <b>Oxygen therapy modality</b>                         |             |
| Room air (n, %)                                        |             |
| Nasal cannula (n, %)                                   |             |
| Simple face mask (n, %)                                |             |
| Venturi mask (n, %)                                    |             |
| Non-rebreather mask (n, %)                             |             |
| HFNC (n, %)                                            |             |
| CPAP (n, %)                                            |             |
| Bubble (n, %)                                          |             |
| Nasal pillows (n, %)                                   |             |
| Helmet (n, %)                                          |             |
| Full face mask (n, %)                                  |             |
| BiPAP (n, %)                                           |             |
| Full face mask (n, %)                                  |             |
| Nasal pillows (n, %)                                   |             |
| Helmet (n, %)                                          |             |
| Invasive mechanical ventilation (n, %)                 |             |
| Other (n, %)                                           |             |
| <b>Ventilator mode</b>                                 |             |
| Volume control (n, %)                                  |             |
| Pressure control (n, %)                                |             |
| Synchronized intermittent mandatory ventilation (n, %) |             |
| Pressure support (n, %)                                |             |
| Other (n, %)                                           |             |



**Table 3.** Outcomes at hospital discharge

| Variable                                             | Overall N = |
|------------------------------------------------------|-------------|
| Hospital outcomes                                    |             |
| Clinical status at discharge                         |             |
| Death (n, %)                                         |             |
| Alive – clinical improved (n, %)                     |             |
| Alive – not clinical improved (n, %)                 |             |
| Lost (n, %)                                          |             |
| Oxygen requirements on discharge                     |             |
| Yes (n, %)                                           |             |
| Source                                               |             |
| Cylinder (n, %)                                      |             |
| Concentrator (n, %)                                  |             |
| Other (n, %)                                         |             |
| Delivery devices                                     |             |
| Nasal cannula (n, %)                                 |             |
| Simple face mask (n, %)                              |             |
| Venturi mask (n, %)                                  |             |
| Non-breather mask (n, %)                             |             |
| CPAP/BiPAP (n, %)                                    |             |
| Other (n, %)                                         |             |
| Patients discharged with pulse oximeter (n, %)       |             |
| Time to event outcomes                               |             |
| Length of hospital stay                              |             |
| Days from hospital admission until transfer or death |             |
| Days of hospitalization of survivors                 |             |
| Days of hospitalization of non-survivors             |             |

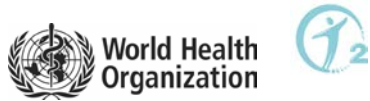

**Table 4.** Oxygen supply at each facility

| Variable                                             | Overall<br>N = | African<br>Region N = | Region of<br>the<br>Americas N<br>= | South-East<br>Asia Region N<br>= | European Region N<br>= | Eastern<br>Mediterranean<br>Region N = | Western<br>Pacific<br>Region N = |
|------------------------------------------------------|----------------|-----------------------|-------------------------------------|----------------------------------|------------------------|----------------------------------------|----------------------------------|
| Total beds available                                 |                |                       |                                     |                                  |                        |                                        |                                  |
| Median (IQR)                                         |                |                       |                                     |                                  |                        |                                        |                                  |
| Total ICU beds available                             |                |                       |                                     |                                  |                        |                                        |                                  |
| Median (IQR)                                         |                |                       |                                     |                                  |                        |                                        |                                  |
| Staff dedicated for maintenance of medical equipment |                |                       |                                     |                                  |                        |                                        |                                  |
| Yes (n, %)                                           |                |                       |                                     |                                  |                        |                                        |                                  |
| Number of staff (n, %)                               |                |                       |                                     |                                  |                        |                                        |                                  |
| Total number of ventilators                          |                |                       |                                     |                                  |                        |                                        |                                  |
| Median (IQR)                                         |                |                       |                                     |                                  |                        |                                        |                                  |
| Total number of BiPAP                                |                |                       |                                     |                                  |                        |                                        |                                  |
| Median (IQR)                                         |                |                       |                                     |                                  |                        |                                        |                                  |
| Total number of CPAP                                 |                |                       |                                     |                                  |                        |                                        |                                  |
| Median (IQR)                                         |                |                       |                                     |                                  |                        |                                        |                                  |
| Total number of HFNC                                 |                |                       |                                     |                                  |                        |                                        |                                  |
| Median (IQR)                                         |                |                       |                                     |                                  |                        |                                        |                                  |
| Back-up generator                                    |                |                       |                                     |                                  |                        |                                        |                                  |
| Yes (n, %)                                           |                |                       |                                     |                                  |                        |                                        |                                  |
| Grid electricity collection                          |                |                       |                                     |                                  |                        |                                        |                                  |
| Yes (n, %)                                           |                |                       |                                     |                                  |                        |                                        |                                  |
| Piped network for medical gases                      |                |                       |                                     |                                  |                        |                                        |                                  |
| Yes (n, %)                                           |                |                       |                                     |                                  |                        |                                        |                                  |
| Bedside concentrators                                |                |                       |                                     |                                  |                        |                                        |                                  |
| Yes (n, %)                                           |                |                       |                                     |                                  |                        |                                        |                                  |
| Number median (IQR)                                  |                |                       |                                     |                                  |                        |                                        |                                  |
| Oxygen cylinders                                     |                |                       |                                     |                                  |                        |                                        |                                  |
| Yes (n, %)                                           |                |                       |                                     |                                  |                        |                                        |                                  |
| Quantity used monthly                                |                |                       |                                     |                                  |                        |                                        |                                  |
| Liquid oxygen capacity                               |                |                       |                                     |                                  |                        |                                        |                                  |
| Yes (n, %)                                           |                |                       |                                     |                                  |                        |                                        |                                  |
| Pressure swing adsorption plant                      |                |                       |                                     |                                  |                        |                                        |                                  |
| Yes (n, %)                                           |                |                       |                                     |                                  |                        |                                        |                                  |



## 5. Missing data

Records with missing admission dates will be excluded from the analysis. To avoid loss of information and statistical power in the association analysis, missing data will be imputed using a non-parametric random forest imputation algorithm implemented in the missForest R package (3). To prevent too many assumptions, only variables with less than 10% of missing information will be considered for imputation. To get a better understanding of the way missing data distribute among variables in the study, correlation matrixes, patching patterns, and box plot analyses will be performed by means of several functions implemented in MICE and VIM R packages. By checking the missing pattern distribution, missing data would be considered either non-completely at random, missing not at random, or missing at random. Sensitivity analyses on complete cases will be performed.

## 6. Sample size

The sample sizes to assess associations between each transition and patient's characteristics at the time of hospital admission were calculated.

Because there exists no published method to perform power analysis for multistate models, a priori power analysis was calculated for separate logistic regressions (LR) corresponding to each of the transitions of interest presented in Fig. 1. For each of these LRs, the event of interest was the probability for a patient to go through the transition during their hospitalization. Basal transition rates between states were hypothesized by the Study Steering Committee WHO panel of experts in the reference population, and are summarized in Fig. 4. Basal event rates ( $Pr Y=1$ ) were derived from these transition rates as summarized in Table 5. Seven covariates were considered (age, gender, vaccination, SpO<sub>2</sub>, having at least one comorbidity, having more than one comorbidity, and the percentage ICU beds in the facility). A priori distributions for these covariates were estimated using the WHO Global Clinical Platform, as summarized in Table 6. The sample size was estimated to achieve in a two-sided z-test with a  $\alpha=0.01$  to account for the multiple testing incurred, and a power of at least 0.9. The squared multiple correlations for covariates were estimated in a moderate  $R^2=0.2$  using the procedure of Demidenko with variance correction (4). G\*Power 3.1 Software was used for the estimations (5). No literature was found to estimate odds ratios (ORs) for the percentage ICU beds indicator so sample size was computed for a conservative OR = 2 for each of the transitions.

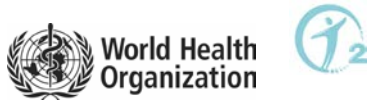

1  
2  
3  
4 **Table 6** displays the sample size required to estimate the effect of each of age, gender,  
5 vaccination, SpO<sub>2</sub>, presence of comorbidities and percentage ICU beds on each transition under  
6 these assumptions. A chart provided in **Fig. 5** shows the achieved power for a given sample size.  
7

8  
9 **Table 7** displays the sample size required to estimate the effect of each of the facility level  
10 characteristics in the facility level model: electricity availability, number of biomedical experts and  
11 number of health care workers who provide direct patient care and can manage patients with  
12 respiratory failure on the time to death under these assumptions. A chart provided in **Fig. 6** shows  
13 the achieved power for a given sample size for this last model. G\*Power input parameters are  
14 available upon request. The proposed multivariable analysis sample size is **N = 1378**.  
15  
16  
17  
18  
19  
20  
21  
22  
23  
24  
25  
26  
27  
28  
29  
30  
31  
32  
33  
34  
35  
36  
37  
38  
39  
40  
41  
42  
43  
44  
45  
46  
47  
48  
49  
50  
51  
52  
53  
54  
55  
56  
57  
58  
59  
60

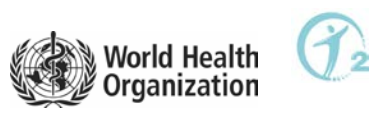

Fig. 4. The estimated rate of transitions

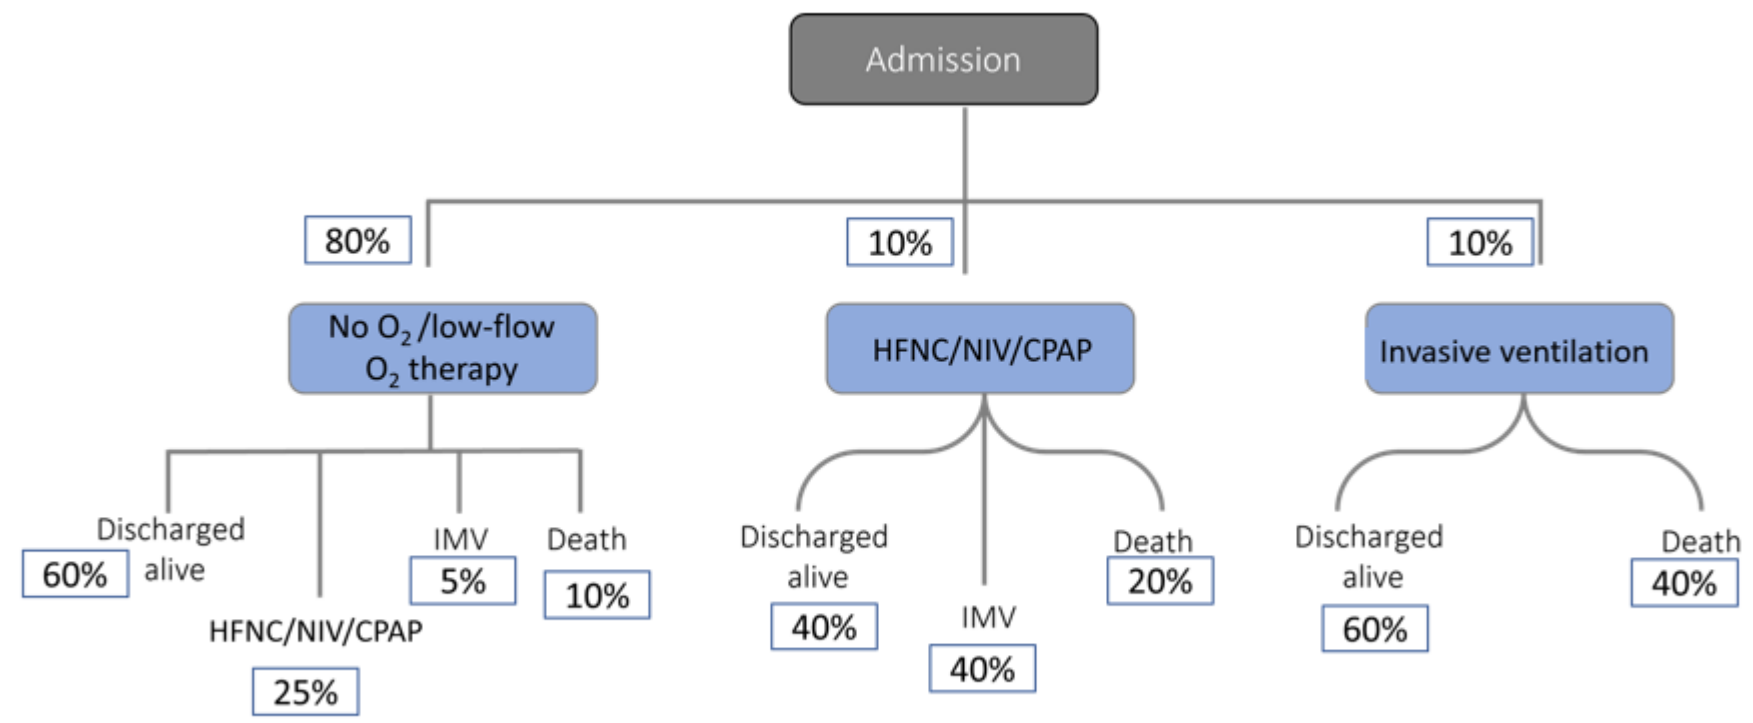

1  
2  
3  
4  
5  
6  
7  
8  
9  
10  
11  
12  
13  
14  
15  
16  
17  
18  
19  
20  
21  
22  
23  
24  
25  
26  
27  
28  
29  
30  
31  
32  
33  
34  
35  
36  
37  
38  
39  
40  
41  
42  
43  
44  
45  
46

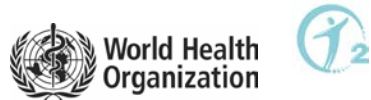

**Table 5.** Computation of basal event rates based on transition rates described in Fig. 4; the total proportion of admitted patients that will pass through the transition from state A to state B

| Transition number in Fig. 1 | State A                                            | State B                  | Among admitted patients, percent to go through state A <sup>a</sup> | Among patients in state A, percent to transition to state B <sup>b</sup> | Basal event rate <sup>c</sup> |
|-----------------------------|----------------------------------------------------|--------------------------|---------------------------------------------------------------------|--------------------------------------------------------------------------|-------------------------------|
| 1                           | No O <sub>2</sub> /standard O <sub>2</sub> therapy | Non-invasive ventilation | 80%                                                                 | 25%                                                                      | <b>20.0%</b>                  |
| 2                           | No O <sub>2</sub> /standard O <sub>2</sub> therapy | Death                    | 80%                                                                 | 10%                                                                      | <b>8.0%</b>                   |
| 3                           | No O <sub>2</sub> /standard O <sub>2</sub> therapy | Invasive ventilation     | 80%                                                                 | 5%                                                                       | <b>4.0%</b>                   |
| 5                           | Non-invasive ventilation                           | Invasive ventilation     | 30%                                                                 | 40%                                                                      | <b>12.0%</b>                  |
| 7                           | Non-invasive ventilation                           | Death                    | 30%                                                                 | 20%                                                                      | <b>6.0%</b>                   |
| 9                           | Invasive ventilation                               | Death                    | 26%                                                                 | 40%                                                                      | <b>10.4%</b>                  |

<sup>a</sup> Sum of patients to go through a given state, irrespective of their trajectory.

<sup>b</sup> See Fig. 4.

<sup>c</sup> Among all admitted patients, proportion to go through transition A → B = p(A) \* p(B).

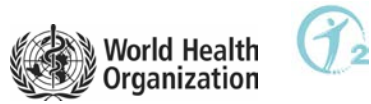

**Table 6.** A priori distribution parameters for covariates to be included in the model, necessary for sample size computation

| Covariate              | Estimated distribution in study population <sup>a</sup> |
|------------------------|---------------------------------------------------------|
| 50–65 year olds        | 28%                                                     |
| Male                   | 47%                                                     |
| Vaccinated             | 21%                                                     |
| SP0 <sub>2</sub> < 90% | 22%                                                     |
| 1 comorbidity          | 28%                                                     |
| > 1 comorbidity        | 24%                                                     |

<sup>a</sup> Estimation derived from the WHO Global Clinical Platform.

**Table 7.** Sample size estimation for each covariate in the multivariable analysis to assess the association with each transition

| Probability of transition from No O <sub>2</sub> /standard O <sub>2</sub> therapy to HFNC/NIV/CPAP |                        |                                                  | Reference                                                                                                                                                                                                                                                                                                                                                                                           | Sample size* |
|----------------------------------------------------------------------------------------------------|------------------------|--------------------------------------------------|-----------------------------------------------------------------------------------------------------------------------------------------------------------------------------------------------------------------------------------------------------------------------------------------------------------------------------------------------------------------------------------------------------|--------------|
|                                                                                                    | reference              | Interest                                         |                                                                                                                                                                                                                                                                                                                                                                                                     |              |
| Age                                                                                                | <i>18–29 years old</i> | <i>50–65 years old</i><br><b>4 times higher</b>  | <a href="#">CDC, July 19 2021 (8)</a>                                                                                                                                                                                                                                                                                                                                                               | N = 227      |
| Gender                                                                                             | <i>Male</i>            | <b>3 times higher</b>                            | <a href="https://www.nature.com/articles/s41467-020-19741-6">https://www.nature.com/articles/s41467-020-19741-6</a>                                                                                                                                                                                                                                                                                 | N = 309      |
| Vaccination                                                                                        | <i>No</i>              | <b>Yes</b><br><b>12 times higher</b>             | <a href="https://covid.cdc.gov/covid-data-tracker/?CDC_AA_refVal=https%3A%2F%2Fwww.cdc.gov%2Fcoronavirus%2F2019-ncov%2Fcases-updates%2Fcases-in-us.html#%3Fcontext=net-hospitalizations-vaccination">https://covid.cdc.gov/covid-data-tracker/?CDC_AA_refVal=https%3A%2F%2Fwww.cdc.gov%2Fcoronavirus%2F2019-ncov%2Fcases-updates%2Fcases-in-us.html#%3Fcontext=net-hospitalizations-vaccination</a> | N = 96       |
| SpO <sub>2</sub>                                                                                   | <i>&gt; 90%</i>        | <i>&lt; 89%</i><br><b>4 times higher</b>         | <a href="#">Mejía F et al., 2021 (9)</a>                                                                                                                                                                                                                                                                                                                                                            | N = 264      |
| Comorbidity (1)                                                                                    | <i>No</i>              | <i>Yes</i><br><b>3 times higher</b>              | Zhou Y et al., 2020 (10)                                                                                                                                                                                                                                                                                                                                                                            | N = 369      |
| Comorbidity (> 1)                                                                                  | <i>No</i>              | <i>Yes</i><br><b>3 times higher</b>              | Zhou Y et al., 2020 (10)                                                                                                                                                                                                                                                                                                                                                                            | N = 405      |
| % ICU beds                                                                                         | <i>Continuous</i>      | <i>+/- 1 SD</i><br><b>OR = 2</b>                 | No literature                                                                                                                                                                                                                                                                                                                                                                                       | N = 265      |
| Probability of transition from No O <sub>2</sub> /standard O <sub>2</sub> therapy to death         |                        |                                                  |                                                                                                                                                                                                                                                                                                                                                                                                     |              |
| Age                                                                                                | <i>18–29 years old</i> | <i>50–65 years old</i><br><b>35 times higher</b> | <a href="#">CDC, July 19 2021 (8)</a>                                                                                                                                                                                                                                                                                                                                                               | N = 51       |
| Gender                                                                                             | <i>Female</i>          | <b>3 times higher</b>                            | <a href="https://www.ncbi.nlm.nih.gov/pmc/articles/PMC8270145/">https://www.ncbi.nlm.nih.gov/pmc/articles/PMC8270145/</a>                                                                                                                                                                                                                                                                           | N = 572      |
| Vaccination                                                                                        | <i>No</i>              | <b>14 times higher</b>                           | <a href="https://covid.cdc.gov/covid-data-tracker/?CDC_AA_refVal=https%3A%2F%2Fwww.cdc.gov%2Fcoronavirus%2F2019-ncov%2Fcases-updates%2Fcases-in-us.html#%3Fcontext=net-rates-by-vaccine-status">https://covid.cdc.gov/covid-data-tracker/?CDC_AA_refVal=https%3A%2F%2Fwww.cdc.gov%2Fcoronavirus%2F2019-ncov%2Fcases-updates%2Fcases-in-us.html#%3Fcontext=net-rates-by-vaccine-status</a>           | N = 101      |
| SpO <sub>2</sub>                                                                                   | <i>&gt; 90%</i>        | <i>&lt; 89%</i><br><b>4 times higher</b>         | <a href="#">Mejía F et al., 2021 (9)</a>                                                                                                                                                                                                                                                                                                                                                            | N = 436      |
| Comorbidity (1)                                                                                    | <i>No</i>              | <i>Yes</i><br><b>3 times higher</b>              | Zhou Y et al., 2020 (10)                                                                                                                                                                                                                                                                                                                                                                            | N = 660      |
| Comorbidity (> 1)                                                                                  | <i>No</i>              | <i>Yes</i><br><b>3 times higher</b>              | Zhou Y et al., 2020 (10)                                                                                                                                                                                                                                                                                                                                                                            | N = 720      |





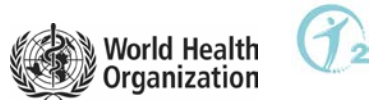

|                                                       |                        |                                                  |                                                                                                                                                                                                                                                                                                                                                             |         |
|-------------------------------------------------------|------------------------|--------------------------------------------------|-------------------------------------------------------------------------------------------------------------------------------------------------------------------------------------------------------------------------------------------------------------------------------------------------------------------------------------------------------------|---------|
| % ICU beds                                            | <i>continuous</i>      | <i>+/- 1 SD</i><br><b>OR = 2</b>                 | No literature                                                                                                                                                                                                                                                                                                                                               | N = 367 |
| Probability of transition from HFNC/NIV/CPAP to death |                        |                                                  |                                                                                                                                                                                                                                                                                                                                                             |         |
| Age                                                   | <i>18–29 years old</i> | <i>50–65 years old</i><br><b>35 times higher</b> | <a href="#">CDC, July 19 2021 (8)</a>                                                                                                                                                                                                                                                                                                                       | N = 55  |
| Gender                                                | <i>Male</i>            | <b>3 times higher</b>                            | <a href="https://www.ncbi.nlm.nih.gov/pmc/articles/PMC8270145/">https://www.ncbi.nlm.nih.gov/pmc/articles/PMC8270145/</a>                                                                                                                                                                                                                                   | N = 726 |
| Vaccination                                           | <i>No</i>              | <b>14 times higher</b>                           | <a href="https://covid.cdc.gov/covid-data-tracker/?CDC_AA_refVal=https%3A%2F%2Fwww.cdc.gov%2Fcoronavirus%2F2019-ncov%2Fcases-updates%2Fcases-in-us.html#rates-by-vaccine-status">https://covid.cdc.gov/covid-data-tracker/?CDC_AA_refVal=https%3A%2F%2Fwww.cdc.gov%2Fcoronavirus%2F2019-ncov%2Fcases-updates%2Fcases-in-us.html#rates-by-vaccine-status</a> | N = 116 |
| SpO <sub>2</sub>                                      | <i>&gt; 90%</i>        | <i>&lt; 89%</i><br><b>4 times higher</b>         | <a href="#">Mejía F et al., 2021 (9)</a>                                                                                                                                                                                                                                                                                                                    | N = 542 |
| Comorbidity (1)                                       | <i>No</i>              | <i>Yes</i><br><b>3 times higher</b>              | Zhou Y et al., 2020 (10)                                                                                                                                                                                                                                                                                                                                    | N = 833 |
| Comorbidity (> 1)                                     | <i>No</i>              | <i>Yes</i><br><b>3 times higher</b>              | Zhou Y et al., 2020 (10)                                                                                                                                                                                                                                                                                                                                    | N = 907 |
| % ICU beds                                            | <i>Continuous</i>      | <i>+/- 1 SD</i><br><b>OR = 2</b>                 | No literature                                                                                                                                                                                                                                                                                                                                               | N = 624 |
| Probability of transition from IMV to death           |                        |                                                  |                                                                                                                                                                                                                                                                                                                                                             |         |
| Age                                                   | <i>18–29 years old</i> | <i>50–65 years old</i><br><b>35 times higher</b> | <a href="#">CDC, July 19 2021 (8)</a>                                                                                                                                                                                                                                                                                                                       | N = 49  |
| Gender                                                | <i>Male</i>            | <b>3 times higher</b>                            | <a href="https://www.ncbi.nlm.nih.gov/pmc/articles/PMC8270145/">https://www.ncbi.nlm.nih.gov/pmc/articles/PMC8270145/</a>                                                                                                                                                                                                                                   | N = 467 |
| Vaccination                                           | <i>No</i>              | <b>14 times higher</b>                           | <a href="https://covid.cdc.gov/covid-data-tracker/?CDC_AA_refVal=https%3A%2F%2Fwww.cdc.gov%2Fcoronavirus%2F2019-ncov%2Fcases-updates%2Fcases-in-us.html#rates-by-vaccine-status">https://covid.cdc.gov/covid-data-tracker/?CDC_AA_refVal=https%3A%2F%2Fwww.cdc.gov%2Fcoronavirus%2F2019-ncov%2Fcases-updates%2Fcases-in-us.html#rates-by-vaccine-status</a> | N = 92  |
| SpO <sub>2</sub>                                      | <i>&gt; 90%</i>        | <i>&lt; 89%</i><br><b>4 times higher</b>         | <a href="#">Mejía F et al., 2021 (9)</a>                                                                                                                                                                                                                                                                                                                    | N = 365 |
| Comorbidity (1)                                       | <i>No</i>              | <i>Yes</i><br><b>3 times higher</b>              | Zhou Y et al., 2020 (10)                                                                                                                                                                                                                                                                                                                                    | N = 543 |
| Comorbidity (> 1)                                     | <i>No</i>              | <i>Yes</i><br><b>3 times higher</b>              | Zhou Y et al., 2020 (10)                                                                                                                                                                                                                                                                                                                                    | N = 593 |
| % ICU beds                                            | <i>Continuous</i>      | <i>+/- 1 SD</i><br><b>OR = 2</b>                 | No literature                                                                                                                                                                                                                                                                                                                                               | N = 407 |

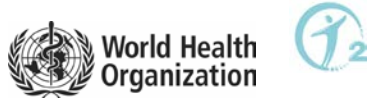

Fig. 5. Achieved power vs sample size for the multistate model

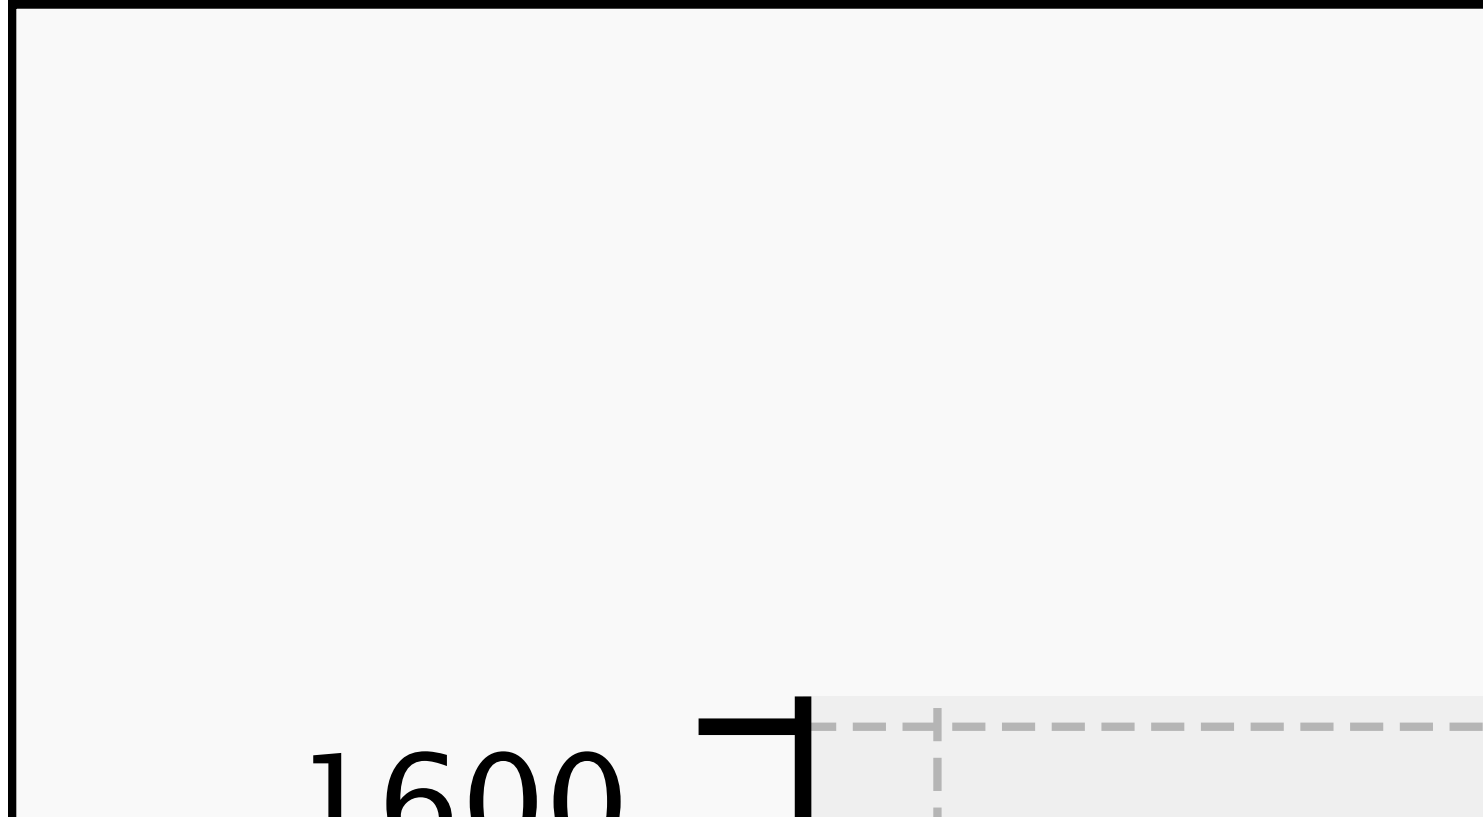

1  
2  
3  
4  
5  
6  
7  
8  
9  
10  
11  
12  
13  
14  
15  
16  
17  
18  
19  
20  
21  
22  
23  
24  
25  
26  
27  
28  
29  
30  
31  
32  
33  
34  
35  
36  
37  
38  
39  
40  
41  
42  
43  
44  
45  
46



**Table 8.** Sample size estimation for each covariate in the multivariable analysis to assess the association with death

|                                                                | Probability of death             |                                          | Reference                       | Sample size |
|----------------------------------------------------------------|----------------------------------|------------------------------------------|---------------------------------|-------------|
|                                                                | Reference                        | Interest                                 |                                 |             |
| Electricity                                                    | <i>No</i><br>5% event rate       | <i>Yes</i><br><b>5 times higher</b>      |                                 | N = 634     |
| Biomedical staff                                               | <i>&gt; 90%</i><br>5% event rate | <i>&lt; 89%</i><br><b>4 times higher</b> | <u>Mejía F et al., 2020 (9)</u> | N = 852     |
| Any clinical staff<br>who can manage<br>respiratory<br>failure | <i>No</i><br>5% event rate       | <i>Yes</i><br><b>3 times higher</b>      | Zhou Y et al., 2020 (10)        | N = 1378    |

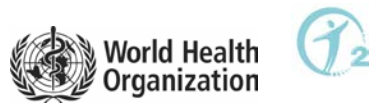

Fig. 6. Achieved power vs sample size for the facility level model

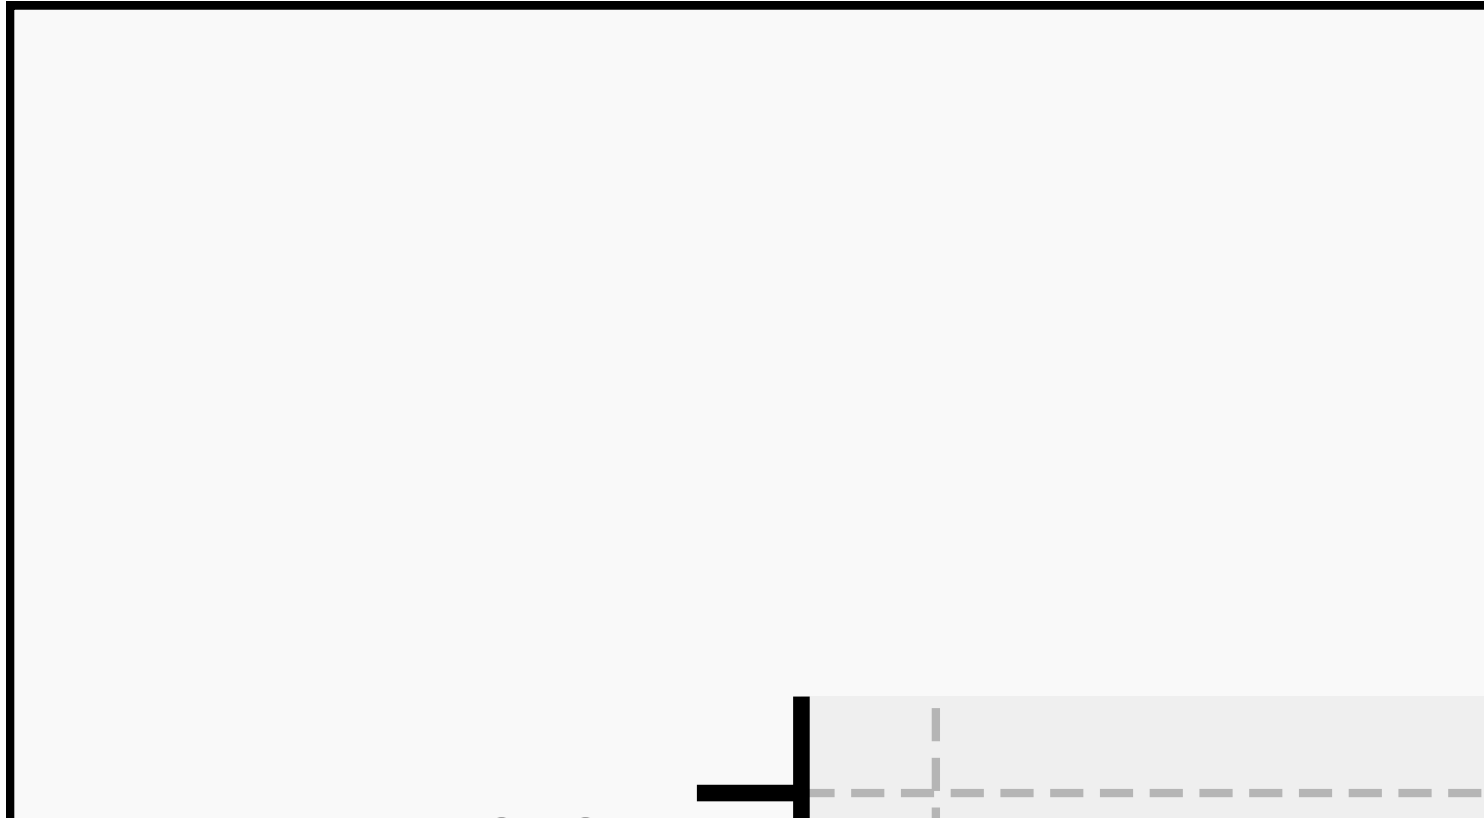

## 7. Statistical software

All analyses will be conducted in R (*R: a language and environment for statistical computing*. R Core Team, R Foundation for Statistical Computing, Vienna, Austria; 2020 (<https://www.R-project.org>) (7).

## References

1. Subirana I, Vila J, Sanz H, Gavin L, Penafiel J, Gimenez D. Package compareGroups [Internet]. 2018 (<https://cran.r-project.org/web/packages/compareGroups/index.html>, accessed 14 November 2022).
2. de Wreede LC, Fiocco M, Putter H. mstate: an {R} package for the analysis of competing risks and multi-state models. *J Stat Softw*. 2011;38(7):1–30 (<https://www.jstatsoft.org/v38/i07/>, accessed 14 November 2022).
3. Stekhoven DJ, Bühlmann P. MissForest - nonparametric missing value imputation for mixed-type data. 2011 (<http://arxiv.org/abs/1105.0828>, accessed 14 November 2022).
4. Demidenko E. Sample size determination for logistic regression revisited. *Stat Med*. 2006;26(18):3385–97 (<https://onlinelibrary.wiley.com/doi/10.1002/sim.2771>, accessed 14 November 2022).
5. Erdfelder E, Faul F, Buchner A. GPOWER: A general power analysis program. *Behav Res Methods, Instruments, Comput*. 1996;28(1):1–11 (<http://link.springer.com/10.3758/BF03203630>, accessed 14 November 2022).
6. Wickham H, Navarro D, Pedersen TL. *Ggplot2: elegant graphics for data analysis*. Springer; 2016. [not cited?]
7. R: A language and environment for statistical computing. R Development Core Team. Vienna, Austria; 2008. ISBN 3-900051-07-0. [cited out of sequence]
8. Risk for COVID-19 infection, hospitalization, and death by age group. Atlanta, GA: Centres for Disease Control and Prevention; 2021 (<https://www.cdc.gov/coronavirus/2019-ncov/covid-data/investigations-discovery/hospitalization-death-by-age.html>, accessed 14 November 2022).
9. Mejía F, Medina C, Cornejo E, Morello E, Vásquez S, Alave J et al. Oxygen saturation as a predictor of mortality in hospitalized adult patients with COVID-19 in a public hospital in Lima, Peru. *PLoS One*. 2020;15(12):e0244171 (<https://dx.plos.org/10.1371/journal.pone.0244171>, accessed 14 November 2022).
10. Zhou Y, Yang Q, Chi J, Dong B, Lv W, Shen L et al. Comorbidities and the risk of severe or fatal outcomes associated with coronavirus disease 2019: a systematic review and meta-analysis. *Int J Infect Dis*. 2020;99:47–56 (<https://www.ncbi.nlm.nih.gov/pmc/articles/PMC7381888/>, accessed 14 November 2022).

## Annex 5. Data sharing agreement

### DATA-SHARING AGREEMENT

#### Schedule of particulars

This Data-Sharing Agreement is comprised of: (i) this Schedule of Particulars; (ii) Annex I – General Conditions; and (iii) Annex II – Project Description (together, the “**Agreement**”).

Pursuant to the terms of this Agreement, the Contributor hereby agrees to provide, and WHO hereby agrees to accept, the Data for the Purpose of Use and subject to the Restrictions on Use.

In this Agreement, the following expressions have the following meanings:

1. The "**Contributor**": [full legal name of your institution];
2. "**WHO**": the World Health Organization, 20 Avenue Appia, CH-1211 Geneva 27, Switzerland;
3. The "**Data**": Any data, results and reports, unpublished or otherwise, collected during or resulting from the Project which are owned by the Contributor and provided by the Contributor to WHO during the term of this Agreement;
4. The "**Parties**": the Contributor and WHO;
5. The "**Project**" as further described in Annex II;
6. The "**Purpose of Use**": The Data are provided to WHO for WHO to implement the Project which is summarized in Annex II and for use in related materials and activities, including but not limited to WHO's internal research purposes;
7. The "**Restrictions on Use**": The Data shall not be used for any purpose other than the Purpose of Use;
8. The "**Term of Agreement**": [Unrestricted in time]; and
9. "**Data Charges**": The Data will be provided free of charge.

Acknowledged and agreed:

Signed for and on behalf of WHO

Signed for and on behalf of the Contributor

Name: Janet Diaz

Name:

Title: Lead, Clinical Management for COVID-19

Title:

Date:

Date:

## DATA-SHARING AGREEMENT

### Annex I – General Conditions

#### 1. Use

- 1.1. The Data are supplied by the Contributor to WHO solely for the Purpose of Use and subject to the Restrictions on Use.
- 1.2. Other than for and within the Purpose of Use, the Data shall not be transferred, sold, offered for sale or otherwise used, without the prior written agreement of the Contributor.
- 1.3. WHO shall only allow parties who have a need to know for the Purpose of Use and who are bound by similar obligations of confidentiality and restrictions on use as contained in this Agreement to have access to the Data.
- 1.4. In implementing the Purpose of Use, WHO will: not attempt to identify or contact research participants included in the Data; Respect the confidentiality of the Data; and maintain the Data in a secure location on a password-protected, WHO-internal network protected by standard encoding and the WHO firewall for the duration of the Purpose of Use.

#### 2. Confidentiality

- 2.1. The Data may incorporate confidential information of the Contributor. Accordingly, if and to the extent any such Data are clearly marked by the Contributor as “confidential”, WHO shall during the term of this Agreement and for a period of five years following its termination, treat such Data confidential and only disclose them under like obligations of confidentiality and restrictions on use as those contained herein. WHO shall be deemed to have fulfilled its obligations, if it exercises at least the same degree of care in maintaining confidentiality as it would in protecting its own confidential information.
- 2.2. However, the above mentioned obligations of confidentiality shall not apply to Data which:
  - (i) can be shown to have been known to WHO at the time of its acquisition from the Contributor;
  - (ii) are acquired from a third party, not in breach of any obligation of confidentiality to the Contributor;
  - (iii) are independently devised or arrived at by, on behalf of, or for WHO without access to the Information; or
  - (iv) enter the public domain otherwise than by breach of the undertakings set out in this Agreement.

#### 3. Rights

- 3.1. Except for the rights explicitly granted to WHO hereunder, nothing contained in this Agreement shall be construed as conveying any rights under any patents or other intellectual property which either party may have or may hereafter obtain.
- 3.2. Nothing contained in this Agreement shall restrict the Contributor's right to sell, transfer, assign or distribute the Data to any other person for commercial or non-commercial purposes.

#### 4. Publications

- 4.1. Subject to the Contributor's proprietary rights, the results obtained through use of the Data within the Purpose of Use may be published by WHO and/or parties collaborating with WHO. In order to avoid prejudice to the Contributor's proprietary rights, WHO shall transmit any material intended to be published or relevant portions thereof, to the Contributor under confidential cover for review at least ten days prior to its submission to any editor, publisher, referee or meeting organizer. In absence of any objection by



1  
2  
3 the Contributor within that thirty-day period concerning prejudice to its proprietary  
4 rights, the publication may proceed, provided, however, that the Contributor shall be  
5 duly acknowledged in such publication.

- 6  
7 4.2. WHO will prepare manuscript(s) of the results of the Purpose of Use for publication,  
8 pursuant to the terms of the applicable protocol, and publish such manuscripts  
9 pursuant to WHO's rules and regulations, including its policy on open access, as  
10 contained at: <http://www.who.int/about/policy/en/>. WHO may further use the results  
11 of the Purpose of Use to update relevant WHO recommendations and develop any  
12 guidelines, including publication thereof, and may further publish those results.
- 13 4.3. If a manuscript of the Research Activities is submitted for publication, WHO will in all  
14 events retain the Data until the peer review process is completed, and then for one  
15 year after publication to ensure sufficient time to address any required responses to the  
16 findings (e.g., letters to the editor).
- 17 4.4. WHO will ensure that all publications relating to the Data will appropriately  
18 acknowledge WHO, the Contributor, and all other entities contributing data to the  
19 publication.
- 20  
21

## 22 **5. Undertakings of the Contributor**

- 23 5.1. The Contributor represents and warrants that: It has obtained all rights and permissions  
24 necessary to transfer the Data to WHO and for WHO to implement the Purpose of Use  
25 and all other activities relating to the Data as described herein; The Data have been  
26 collected from clinical trials, observational studies, or surveillance systems that have  
27 been conducted in accordance with all applicable laws.
- 28 5.2. Prior to transmitting the Data to WHO, the Contributor will: Verify whether approval  
29 from their local/relevant Ethics Review Committee is required for the use of the Data  
30 for the Purpose of Use, and if that approval is required, obtain it; and Anonymize all  
31 participant-level data in the Data, pursuant to agreed standards, to remove all  
32 information in the Data that could be used to identify research participants.
- 33 5.3. The Contributor will transmit the Data to WHO securely, using secure file transfer  
34 protocol.
- 35 5.4. The Contributor will avoid providing to WHO any information relating to the Data or the  
36 Research Activities that relates to a natural person, which, either directly or indirectly,  
37 in combination with other information available or likely to be available to WHO, can  
38 identify such natural person.
- 39 5.5. The Contributor makes no warranty of the fitness of the Data for any particular purpose  
40 or any other warranty, either express or implied. However, to the best of the  
41 Contributor's knowledge, the use of the Data within the Purpose of Use shall not infringe  
42 on the proprietary rights of any third party.
- 43 5.6. WHO agrees that (except as may explicitly be provided in this Agreement) the  
44 Contributor has no control over the use that is made of the Data by WHO or parties  
45 collaborating with WHO in accordance with the terms of this Agreement. Consequently,  
46 WHO agrees that the Contributor shall not be liable for such use.
- 47  
48  
49  
50

## 51 **6. Other Matters**

- 52 6.1. Nothing in this Agreement shall be interpreted as establishing a partnership between  
53 the parties or establishing one party as the agent of the other or conferring a right on  
54 one party to bind the other, except as may be specifically set out herein.
- 55 6.2. Without the prior written approval of the other Party, neither Party shall, in any  
56 statement or material of an advertising or promotional nature, refer to this Agreement  
57 or the relationship between the Parties, or use the name (or any abbreviation thereof)  
58 and/or emblem of the other Party.
- 59  
60

- 1  
2  
3 6.3. Any dispute relating to the interpretation or application of this Agreement shall,  
4 unless amicably settled, be subject to conciliation. In the event of failure of the latter,  
5 the dispute shall be settled by arbitration. The arbitration shall be conducted in  
6 accordance with the modalities to be agreed upon by the parties or, in the absence of  
7 agreement, with the rules of arbitration of the International Chamber of Commerce. The  
8 Parties shall accept the arbitral award as final.  
9  
10 6.4. Nothing contained herein shall be construed as a waiver of any of the privileges and  
11 immunities enjoyed by WHO under national or international law and/or as submitting  
12 WHO to any national court or jurisdiction.  
13  
14 6.5. This Agreement sets forth the entire understanding between the parties and supersedes  
15 any prior agreements, written or verbal related to the Data. It shall only be capable of  
16 change by written amendment executed by duly authorized officers of the Parties.  
17  
18  
19  
20  
21  
22  
23  
24  
25  
26  
27  
28  
29  
30  
31  
32  
33  
34  
35  
36  
37  
38  
39  
40  
41  
42  
43  
44  
45  
46  
47  
48  
49  
50  
51  
52  
53  
54  
55  
56  
57  
58  
59  
60

For peer review only

1  
2  
3  
4  
5  
6  
7  
8  
9  
10

**DATA-SHARING  
AGREEMENT  
Annex II – Project  
Description**

11  
12  
13  
14

**Oxygen requirements and approaches to respiratory support in patients with COVID-19 in low- and middle-income countries: an observational study.**

15  
16  
17  
18  
19  
20

**Background:** The COVID-19 pandemic has highlighted, more than ever, the acute need for scale up of oxygen therapy. WHO has provided an inventory tool to quantify facility-level provision of infrastructure to deliver oxygen therapy. However, data on the use of oxygen therapy at the patient-level remains lacking.

21  
22

**Population studied:** Suspected or confirmed COVID-19 patients receiving oxygen therapy.

23  
24  
25  
26  
27  
28

**Study design:** We propose to conduct an observational study of patients with suspected or confirmed COVID-19 receiving oxygen therapy. Basic information and risk factor information will be collected from participants. Participants will be followed for 7 days or until outcome (hospital discharge or death).

29  
30  
31  
32  
33

**Outcomes and analyses:** Determination of the person-time on specific respiratory modalities (nasal cannula, face mask, Venturi, NRB, HFNC, CPAP, BiPAP, invasive mechanical ventilation); Proportion of patients on each respiratory modality; Facility oxygen supply metrics; Outcome of patient as measured by WHO clinical progression scale, censored at 30 days.

34  
35  
36  
37  
38  
39  
40  
41  
42  
43  
44  
45  
46  
47  
48  
49  
50  
51  
52  
53  
54  
55  
56  
57  
58  
59  
60

Please refer to the specific protocol and relevant documents (questionnaire, health care facility questionnaire). For questions contact: [covidrespstudy@who.int](mailto:covidrespstudy@who.int)

# Reporting checklist for cohort study.

Based on the STROBE cohort guidelines.

## Instructions to authors

Complete this checklist by entering the page numbers from your manuscript where readers will find each of the items listed below.

Your article may not currently address all the items on the checklist. Please modify your text to include the missing information. If you are certain that an item does not apply, please write "n/a" and provide a short explanation.

Upload your completed checklist as an extra file when you submit to a journal.

In your methods section, say that you used the STROBE cohort reporting guidelines, and cite them as:

von Elm E, Altman DG, Egger M, Pocock SJ, Gøtzsche PC, Vandenbroucke JP. The Strengthening of Reporting of Observational Studies in Epidemiology (STROBE) Statement: guidelines for reporting observational studies.

|                           | Reporting Item                                                                                                      | Page Number |
|---------------------------|---------------------------------------------------------------------------------------------------------------------|-------------|
| <b>Title and abstract</b> |                                                                                                                     |             |
| Title                     | <a href="#">#1a</a> Indicate the study's design with a commonly used term in the title or the abstract              | 1           |
| Abstract                  | <a href="#">#1b</a> Provide in the abstract an informative and balanced summary of what was done and what was found | 1           |

|    |                      |                     |                                                            |     |
|----|----------------------|---------------------|------------------------------------------------------------|-----|
| 1  | <b>Introduction</b>  |                     |                                                            |     |
| 2  |                      |                     |                                                            |     |
| 3  |                      |                     |                                                            |     |
| 4  | Background /         | <a href="#">#2</a>  | Explain the scientific background and rationale for the    | 3   |
| 5  |                      |                     |                                                            |     |
| 6  | rationale            |                     | investigation being reported                               |     |
| 7  |                      |                     |                                                            |     |
| 8  |                      |                     |                                                            |     |
| 9  |                      |                     |                                                            |     |
| 10 | Objectives           | <a href="#">#3</a>  | State specific objectives, including any prespecified      | 3   |
| 11 |                      |                     |                                                            |     |
| 12 |                      |                     | hypotheses                                                 |     |
| 13 |                      |                     |                                                            |     |
| 14 |                      |                     |                                                            |     |
| 15 | <b>Methods</b>       |                     |                                                            |     |
| 16 |                      |                     |                                                            |     |
| 17 |                      |                     |                                                            |     |
| 18 | Study design         | <a href="#">#4</a>  | Present key elements of study design early in the paper    | 4-5 |
| 19 |                      |                     |                                                            |     |
| 20 |                      |                     |                                                            |     |
| 21 | Setting              | <a href="#">#5</a>  | Describe the setting, locations, and relevant dates,       | 5-6 |
| 22 |                      |                     |                                                            |     |
| 23 |                      |                     | including periods of recruitment, exposure, follow-up,     |     |
| 24 |                      |                     |                                                            |     |
| 25 |                      |                     | and data collection                                        |     |
| 26 |                      |                     |                                                            |     |
| 27 |                      |                     |                                                            |     |
| 28 |                      |                     |                                                            |     |
| 29 | Eligibility criteria | <a href="#">#6a</a> | Give the eligibility criteria, and the sources and methods | 5   |
| 30 |                      |                     |                                                            |     |
| 31 |                      |                     | of selection of participants. Describe methods of follow-  |     |
| 32 |                      |                     |                                                            |     |
| 33 |                      |                     | up.                                                        |     |
| 34 |                      |                     |                                                            |     |
| 35 |                      |                     |                                                            |     |
| 36 | Eligibility criteria | <a href="#">#6b</a> | For matched studies, give matching criteria and number     | n/a |
| 37 |                      |                     |                                                            |     |
| 38 |                      |                     | of exposed and unexposed                                   |     |
| 39 |                      |                     |                                                            |     |
| 40 |                      |                     |                                                            |     |
| 41 |                      |                     |                                                            |     |
| 42 | Variables            | <a href="#">#7</a>  | Clearly define all outcomes, exposures, predictors,        | 7   |
| 43 |                      |                     |                                                            |     |
| 44 |                      |                     | potential confounders, and effect modifiers. Give          |     |
| 45 |                      |                     |                                                            |     |
| 46 |                      |                     | diagnostic criteria, if applicable                         |     |
| 47 |                      |                     |                                                            |     |
| 48 |                      |                     |                                                            |     |
| 49 | Data sources /       | <a href="#">#8</a>  | For each variable of interest give sources of data and     | 7   |
| 50 |                      |                     |                                                            |     |
| 51 | measurement          |                     | details of methods of assessment (measurement).            |     |
| 52 |                      |                     |                                                            |     |
| 53 |                      |                     |                                                            |     |
| 54 |                      |                     | Describe comparability of assessment methods if there      |     |
| 55 |                      |                     |                                                            |     |
| 56 |                      |                     | is more than one group. Give information separately for    |     |
| 57 |                      |                     |                                                            |     |
| 58 |                      |                     |                                                            |     |
| 59 |                      |                     |                                                            |     |
| 60 |                      |                     |                                                            |     |

for exposed and unexposed groups if applicable.

|    |                     |                      |                                                                        |
|----|---------------------|----------------------|------------------------------------------------------------------------|
| 1  |                     |                      |                                                                        |
| 2  |                     |                      |                                                                        |
| 3  |                     |                      |                                                                        |
| 4  | Bias                | <a href="#">#9</a>   | Describe any efforts to address potential sources of 6-7               |
| 5  |                     |                      |                                                                        |
| 6  |                     |                      | bias                                                                   |
| 7  |                     |                      |                                                                        |
| 8  |                     |                      |                                                                        |
| 9  | Study size          | <a href="#">#10</a>  | Explain how the study size was arrived at 6                            |
| 10 |                     |                      |                                                                        |
| 11 |                     |                      |                                                                        |
| 12 | Quantitative        | <a href="#">#11</a>  | Explain how quantitative variables were handled in the 6-7             |
| 13 |                     |                      |                                                                        |
| 14 | variables           |                      | analyses. If applicable, describe which groupings were                 |
| 15 |                     |                      |                                                                        |
| 16 |                     |                      | chosen, and why                                                        |
| 17 |                     |                      |                                                                        |
| 18 |                     |                      |                                                                        |
| 19 | Statistical methods | <a href="#">#12a</a> | Describe all statistical methods, including those used to              |
| 20 |                     |                      | control for confounding                                                |
| 21 |                     |                      |                                                                        |
| 22 |                     |                      |                                                                        |
| 23 |                     |                      |                                                                        |
| 24 |                     |                      |                                                                        |
| 25 | 6-7                 |                      |                                                                        |
| 26 |                     |                      |                                                                        |
| 27 |                     |                      |                                                                        |
| 28 | Statistical methods | <a href="#">#12b</a> | Describe any methods used to examine subgroups and                     |
| 29 |                     |                      | interactions                                                           |
| 30 |                     |                      |                                                                        |
| 31 |                     |                      |                                                                        |
| 32 |                     |                      |                                                                        |
| 33 | Statistical methods | <a href="#">#12c</a> | Explain how missing data were addressed 6                              |
| 34 |                     |                      |                                                                        |
| 35 |                     |                      |                                                                        |
| 36 | Statistical methods | <a href="#">#12d</a> | If applicable, explain how loss to follow-up was                       |
| 37 |                     |                      | addressed                                                              |
| 38 |                     |                      |                                                                        |
| 39 |                     |                      |                                                                        |
| 40 |                     |                      |                                                                        |
| 41 |                     |                      |                                                                        |
| 42 | Statistical methods | <a href="#">#12e</a> | Describe any sensitivity analyses                                      |
| 43 |                     |                      |                                                                        |
| 44 |                     |                      |                                                                        |
| 45 | 6                   |                      |                                                                        |
| 46 |                     |                      |                                                                        |
| 47 |                     |                      |                                                                        |
| 48 | <b>Results</b>      |                      |                                                                        |
| 49 |                     |                      |                                                                        |
| 50 |                     |                      |                                                                        |
| 51 | Participants        | <a href="#">#13a</a> | Report numbers of individuals at each stage of study— N/a – will be    |
| 52 |                     |                      | eg numbers potentially eligible, examined for eligibility, done for    |
| 53 |                     |                      |                                                                        |
| 54 |                     |                      | confirmed eligible, included in the study, completing results, this is |
| 55 |                     |                      |                                                                        |
| 56 |                     |                      | follow-up, and analysed. Give information separately for a protocol    |
| 57 |                     |                      |                                                                        |
| 58 |                     |                      |                                                                        |
| 59 |                     |                      |                                                                        |
| 60 |                     |                      |                                                                        |

for exposed and unexposed groups if applicable.

|    |                        |                                                                            |                  |
|----|------------------------|----------------------------------------------------------------------------|------------------|
| 1  |                        |                                                                            |                  |
| 2  |                        |                                                                            |                  |
| 3  |                        |                                                                            |                  |
| 4  | Participants           | <a href="#">#13b</a> Give reasons for non-participation at each stage      | N/a – will be    |
| 5  |                        |                                                                            | done for         |
| 6  |                        |                                                                            | results, this is |
| 7  |                        |                                                                            | a protocol       |
| 8  |                        |                                                                            |                  |
| 9  |                        |                                                                            |                  |
| 10 |                        |                                                                            |                  |
| 11 |                        |                                                                            |                  |
| 12 |                        |                                                                            |                  |
| 13 | Participants           | <a href="#">#13c</a> Consider use of a flow diagram                        |                  |
| 14 |                        |                                                                            |                  |
| 15 |                        |                                                                            |                  |
| 16 | N/a – will be done     |                                                                            |                  |
| 17 |                        |                                                                            |                  |
| 18 | for results, this is a |                                                                            |                  |
| 19 |                        |                                                                            |                  |
| 20 | protocol               |                                                                            |                  |
| 21 |                        |                                                                            |                  |
| 22 |                        |                                                                            |                  |
| 23 |                        |                                                                            |                  |
| 24 | Descriptive data       | <a href="#">#14a</a> Give characteristics of study participants (eg        | N/a – will be    |
| 25 |                        | demographic, clinical, social) and information on                          | done for         |
| 26 |                        | exposures and potential confounders. Give information                      | results, this is |
| 27 |                        | separately for exposed and unexposed groups if                             | a protocol       |
| 28 |                        | applicable.                                                                |                  |
| 29 |                        |                                                                            |                  |
| 30 |                        |                                                                            |                  |
| 31 |                        |                                                                            |                  |
| 32 |                        |                                                                            |                  |
| 33 |                        |                                                                            |                  |
| 34 |                        |                                                                            |                  |
| 35 |                        |                                                                            |                  |
| 36 | Descriptive data       | <a href="#">#14b</a> Indicate number of participants with missing data for |                  |
| 37 |                        | each variable of interest                                                  |                  |
| 38 |                        |                                                                            |                  |
| 39 |                        |                                                                            |                  |
| 40 |                        |                                                                            |                  |
| 41 | N/a – will be done     |                                                                            |                  |
| 42 |                        |                                                                            |                  |
| 43 | for results, this is a |                                                                            |                  |
| 44 |                        |                                                                            |                  |
| 45 | protocol               |                                                                            |                  |
| 46 |                        |                                                                            |                  |
| 47 |                        |                                                                            |                  |
| 48 |                        |                                                                            |                  |
| 49 | Descriptive data       | <a href="#">#14c</a> Summarise follow-up time (eg, average and total       |                  |
| 50 |                        | amount)                                                                    |                  |
| 51 |                        |                                                                            |                  |
| 52 |                        |                                                                            |                  |
| 53 |                        |                                                                            |                  |
| 54 | N/a – will be done     |                                                                            |                  |
| 55 |                        |                                                                            |                  |
| 56 | for results, this is a |                                                                            |                  |
| 57 |                        |                                                                            |                  |
| 58 |                        |                                                                            |                  |
| 59 |                        |                                                                            |                  |
| 60 |                        |                                                                            |                  |

1 protocol

2  
3  
4 Outcome data [#15](#) Report numbers of outcome events or summary  
5  
6 measures over time. Give information separately for  
7  
8 exposed and unexposed groups if applicable.  
9

10  
11 N/a – will be done

12  
13 for results, this is a

14  
15 protocol

16  
17  
18  
19 Main results [#16a](#) Give unadjusted estimates and, if applicable, N/a – will be  
20  
21 confounder-adjusted estimates and their precision (eg, done for  
22  
23 95% confidence interval). Make clear which results, this is  
24  
25 confounders were adjusted for and why they were a protocol  
26  
27 included  
28  
29

30  
31 Main results [#16b](#) Report category boundaries when continuous variables N/a – will be  
32  
33 were categorized done for  
34  
35 results, this is  
36  
37 a protocol  
38  
39

40  
41 Main results [#16c](#) If relevant, consider translating estimates of relative risk  
42  
43 into absolute risk for a meaningful time period  
44  
45

46  
47 N/a – will be done

48  
49 for results, this is a

50  
51 protocol

52  
53  
54 Other analyses [#17](#) Report other analyses done—eg analyses of subgroups  
55  
56 and interactions, and sensitivity analyses  
57  
58



1 **Discussion**

2

3

4 Key results [#18](#) Summarise key results with reference to study N/a – will be

5 objectives done for

6

7 results, this is

8

9 a protocol

10

11

12

13

14 Limitations [#19](#) Discuss limitations of the study, taking into account N/a – will be

15 sources of potential bias or imprecision. Discuss both done for

16 direction and magnitude of any potential bias. results, this is

17

18 a protocol

19

20

21

22

23

24 Interpretation [#20](#) Give a cautious overall interpretation considering N/a – will be

25 objectives, limitations, multiplicity of analyses, results done for

26 from similar studies, and other relevant evidence. results, this is

27

28 a protocol

29

30

31

32

33

34 Generalisability [#21](#) Discuss the generalisability (external validity) of the 6

35 study results

36

37

38

39 **Other Information**

40

41

42 Funding [#22](#) Give the source of funding and the role of the funders 11

43 for the present study and, if applicable, for the original

44 study on which the present article is based

45

46

47

48

49

50 None The STROBE checklist is distributed under the terms of the Creative Commons Attribution

51 License CC-BY. This checklist can be completed online using <https://www.goodreports.org/>, a tool

52

53 made by the [EQUATOR Network](#) in collaboration with [Penelope.ai](#)

54

55

56

57

58

59

60

# BMJ Open

## WHO O2CoV2: Oxygen requirements and respiratory support in patients with COVID-19 in low- and middle-income countries – protocol for a multi-country, prospective, observational cohort study

|                                 |                                                                                                                                                                                                                                                                                                                                                                                                                                                                                                                                                                                                                                                                                                                                                                                                                                        |
|---------------------------------|----------------------------------------------------------------------------------------------------------------------------------------------------------------------------------------------------------------------------------------------------------------------------------------------------------------------------------------------------------------------------------------------------------------------------------------------------------------------------------------------------------------------------------------------------------------------------------------------------------------------------------------------------------------------------------------------------------------------------------------------------------------------------------------------------------------------------------------|
| Journal:                        | <i>BMJ Open</i>                                                                                                                                                                                                                                                                                                                                                                                                                                                                                                                                                                                                                                                                                                                                                                                                                        |
| Manuscript ID                   | bmjopen-2022-071346.R1                                                                                                                                                                                                                                                                                                                                                                                                                                                                                                                                                                                                                                                                                                                                                                                                                 |
| Article Type:                   | Protocol                                                                                                                                                                                                                                                                                                                                                                                                                                                                                                                                                                                                                                                                                                                                                                                                                               |
| Date Submitted by the Author:   | 02-Jun-2023                                                                                                                                                                                                                                                                                                                                                                                                                                                                                                                                                                                                                                                                                                                                                                                                                            |
| Complete List of Authors:       | Relan, Pryanka; World Health Organization<br>Murthy, Srinivas; University of British Columbia<br>Marshall, John; University of Toronto<br>Annane, Djillali; Raymond poincaré Hospital (APHP) and INSERM<br>Chevret, Sylvie; INSERM<br>Arabi, Yaseen; King Abdullah International Medical Research Center<br>Waweru-Siika, Wangari; Aga Khan University (AKU) Nairobi<br>Dominguez Rodriguez, Sara; World Health Organization<br>Convocar, Pauline; Corazon Locsin Montelibano Memorial Medical Hospital, Manila Doctors Hospital, Southern Philippines Medical Center, Manila Philippines<br>Diaz, Janet; World Health Organization<br>Respiratory Support Research Group, World Health Organization; World Health Organization<br>O2CoV2 International Study Steering Committee, World Health Organization; World Health Organization |
| <b>Primary Subject Heading</b>: | Emergency medicine                                                                                                                                                                                                                                                                                                                                                                                                                                                                                                                                                                                                                                                                                                                                                                                                                     |
| Secondary Subject Heading:      | Global health, Health policy, Intensive care, Public health, Infectious diseases                                                                                                                                                                                                                                                                                                                                                                                                                                                                                                                                                                                                                                                                                                                                                       |
| Keywords:                       | COVID-19, INTENSIVE & CRITICAL CARE, ACCIDENT & EMERGENCY MEDICINE, RESPIRATORY MEDICINE (see Thoracic Medicine), Health policy < HEALTH SERVICES ADMINISTRATION & MANAGEMENT, Protocols & guidelines < HEALTH SERVICES ADMINISTRATION & MANAGEMENT                                                                                                                                                                                                                                                                                                                                                                                                                                                                                                                                                                                    |
|                                 |                                                                                                                                                                                                                                                                                                                                                                                                                                                                                                                                                                                                                                                                                                                                                                                                                                        |

SCHOLARONE™  
Manuscripts

**Title**

**WHO O2CoV2: Oxygen requirements and respiratory support in patients with COVID-19 in low- and middle-income countries – protocol for a multi-country, prospective, observational cohort study**

**Authors**

Pryanka Relan<sup>a</sup>, Srinivas Murthy<sup>b</sup>, John Marshall<sup>c</sup>, Djillali Annane<sup>d</sup>, Sylvie Chevret<sup>e</sup>, Yaseen Arabif<sup>f</sup>, Wangari Waweru-Siika<sup>g</sup>, Sara Dominguez Rodriguez<sup>a</sup>, Pauline Convocar<sup>h</sup>, Janet Diaz<sup>a</sup>, World Health Organization Respiratory Support Research Group\* and O2CoV2 International Study Steering Committee\*\*

- a) World Health Organization, Geneva, Switzerland, [relanp@who.int](mailto:relanp@who.int), [sara.dominguez.r@gmail.com](mailto:sara.dominguez.r@gmail.com), [diazj@who.int](mailto:diazj@who.int)
- b) University of British Columbia, Vancouver, Canada [srinivas.murthy@cw.bc.ca](mailto:srinivas.murthy@cw.bc.ca)
- c) University of Toronto, Toronto, Canada [john.marshall@unityhealth.to](mailto:john.marshall@unityhealth.to)
- d) University Paris Saclay-Versailles, School of Medicine Simone Veil, Raymond poincaré Hospital (APHP) and INSERM, Paris, France [djillali.annane@aphp.fr](mailto:djillali.annane@aphp.fr)
- e) Hôpital Saint-Louis and INSERM, Paris, France [sylvie.chevret@u-paris.fr](mailto:sylvie.chevret@u-paris.fr)
- f) King Saud Bin Abdulaziz University for Health Sciences, Ministry of National Guard Health Affairs, King Abdullah International Medical Research Center, Riyadh, Saudi Arabia [yaseenarabi@yahoo.com](mailto:yaseenarabi@yahoo.com)
- g) Aga Khan University (AKU) Nairobi, Kenya [wangari.siika@aku.edu](mailto:wangari.siika@aku.edu)
- h) Corazon Locsin Montelibano Memorial Medical Hospital, Manila Doctors Hospital, Southern Philippines Medical Center, Manila Philippines [convocar.pauline@gmail.com](mailto:convocar.pauline@gmail.com)

\*WHO Respiratory Support Research Working Group: Neill Adhikari, Diptesh Aryal, Tim Baker, Devasahayam J Christopher, Rob Fowler, Martha Gartley, Ewan Goligher, Rashan Haniffa, Devachandran Jayakumar, Richard H Kallet, Richard Kojan, Arthur Kwizera, Jie Li, Armand Mekontso-Dessap, Christian Paletta, Ingrid Lara Rendon, Elisabeth Riviello, Jorge Salluh, Jonathan A C Sterne, Bruno Martins Tomazini, Bharath Kumar Tirupakuzhi Vijayaraghavan, Fernando Zampieri.

\*\*WHO O2CoV2 International Study Steering Committee: Gasim Amrahli, John Appiah, Diptesh Aryal, Neale Batra, Kieran Bligh, Devasahayam J Christopher, Mohammed Derow, Laura Alejandra Velez Ruiz Gaitan, Itziar Carrasco Garcia, Bridget Griffith, Christophe Guitton, Madiha Hashmi, Rashidatu Kamara, Leticia Kawano-Dourado, Chiori Kodama, Richard Kojan, Gary Kuniyoshi, Arthur Kwizera, Maria Mendes, Dina Pfeifer, Cinzia De Brito Procopio, Ingrid Lara Rendon, Ludovic Reveiz, Elisabeth Riviello, Matthieu Rolland, Amadou Seck, Elizabeth Stanway, Julie Viry, Pushpa Wijesinghe.

**Corresponding author:** Pryanka Relan, World Health Organization, Avenue Appia 20, Geneva Switzerland 1203, [pryanka.relan@gmail.com](mailto:pryanka.relan@gmail.com), +41 79 772 9428

**Keywords:** Oxygen; emergency care; critical care; Low- and- middle-income countries (LMICs); severe acute respiratory illness (SARI); COVID-19

1  
2  
3 44 **Abstract** (Word count = 296).  
4  
5

6 46 **Introduction**

7 47 The severe acute respiratory syndrome coronavirus 2 (SARS-CoV-2) has been identified as the cause  
8 48 of the disease officially named COVID-19, primarily a respiratory illness. COVID-19 was characterized  
9 49 as a pandemic on 11 March 2020. It has been estimated that approximately 20% of people with COVID-  
10 50 19 require oxygen therapy. Oxygen has been listed on the WHO Essential Medicines List and Essential  
11 51 Medicines List for children for almost two decades. The COVID-19 pandemic has highlighted, more than  
12 52 ever, the acute need for scale-up of oxygen therapy. Detailed data on the use of oxygen therapy in  
13 53 LMICs at the patient and facility level are needed to target interventions better globally.  
14  
15

16 54  
17 55 **Methods and analysis**

18 56 We aim to include better describe the requirements and use of oxygen at the facility and patient level of  
19 57 approximately 4,500 patients with COVID-19 in 30 countries. Our objectives are specifically to  
20 58 characterize type and duration of different modalities of oxygen therapy delivered to patients; describe  
21 59 demographics and outcomes of hospitalized patients with COVID-19; and describe facility level oxygen  
22 60 production and support. Primary analyses will be descriptive in nature. Respiratory support transitions  
23 61 will be described in Sankey plots and Kaplan-Meier models will be used to estimate probability of each  
24 62 transition. A multi-state model will be used to study the course of hospital stay of the study population,  
25 63 evaluating transitions of escalating respiratory support transitions to the absorbing states.  
26  
27  
28

29 65 **Ethics and dissemination**

30 66 World Health Organization AdHoc Covid-19 Research Ethics Review Committee has approved this global  
31 67 protocol. When this protocol is adopted at specific country sites, national ERCs may make require  
32 68 adjustments in accordance with their respective national research ethics guidelines. Dissemination of  
33 69 this protocol and global findings will be open access through peer-reviewed scientific journals, study  
34 70 website, press and online media.  
35  
36  
37

38 72 **Registration details:** Clinicaltrials.gov number NCT04918875.  
39  
40  
41  
42  
43  
44  
45  
46  
47  
48  
49  
50  
51  
52  
53  
54  
55  
56  
57  
58  
59  
60

1  
2  
3 73 **Article Summary**

4 74 **Strengths and limitations of this study:**

- 5 75     ▪ This study is the first global description of oxygen use and respiratory support approaches for  
6 76         patients in low-and-middle income countries.
- 7 76     ▪ The longitudinal study design allows for evaluation of changes in vital signs (including oxygen  
8 77         saturation) and respiratory support modalities over time in the same patient, providing support  
9 78         to generation of inferences of causality.
- 10 79     ▪ The study also describes facility level oxygen supply systems and oxygen capacities.  
11 80         Through a multistate model, transitions of respiratory support modalities at the patient-level  
12 81         may be linked to facility-level oxygen systems or other facility-level characteristics.
- 13 81     ▪ The primary limitation of this study is its implementation at different stages of the pandemic  
14 82         across countries, thus challenging internal validity of decisions made at sites with regard to  
15 83         clinical management and oxygen use.  
16 84  
17 85

1  
2  
3 86 **Word count (excluding title page, abstract, references, acknowledgements): 3095**  
4 87

5  
6 88 **Introduction:**

7 89 The severe acute respiratory syndrome coronavirus 2 (SARS-CoV-2) has been identified as the cause  
8 90 of the respiratory disease officially named COVID-19. COVID-19 was declared a Public Health  
9 91 Emergency of International Concern on 30 January 2020 and characterized as a pandemic in March  
10 92 2020<sup>1</sup>.

11 93  
12  
13 94 Since January 2020, it has been estimated that approximately 20% of patients with COVID-19 develop  
14 95 hypoxia and require oxygen supportive therapy. Oxygen is an essential medicine and has been listed as  
15 96 such on the World Health Organization (WHO) Essential Medicines List and Essential Medicines List for  
16 97 children for almost two decades<sup>2,3</sup>. However, in many low and lower-middle income countries, there is  
17 98 inadequate production, supply and use of medical oxygen.  
19 99

20 100 COVID-19 pandemic has highlighted, more than ever, the acute need for scale up of oxygen supply  
21 101 systems. WHO has published a biomedical inventory tool to quantify facility-level infrastructure and  
22 102 resources for the delivery of oxygen<sup>4</sup> and launched a global oxygen access scale up initiative<sup>5</sup>. However,  
23 103 data on the status of oxygen systems, their use and implications of oxygen therapy on patients in low-  
24 104 and middle-income countries remains lacking.  
26 105

27 106 In February 2020, the WHO Research and Development Blueprint for COVID-19 identified key research  
28 107 areas needed for understanding this new disease<sup>6</sup>. One priority area was the types of respiratory  
29 108 support required by patients. To take this forward, the WHO COVID-19 Clinical Characterization and  
30 109 Management research group created a subgroup, the WHO Respiratory Support Research Group, to  
31 110 develop research protocols concerning respiratory support practices and oxygen requirements for the  
32 111 clinical management of COVID-19. Understanding of current practice and available resources in  
33 112 potential sites globally is required.  
35 113

36 114 At the patient level, existing studies collect data on oxygen mode of delivery, but do not characterize the  
37 115 type, quantity and duration of each modality's use and compare transitions across devices<sup>7</sup>. At the  
38 116 facility level, existing studies describe overall hospital surge capacity but do not give an overview of  
39 117 capacities at the country, regional or global level<sup>8</sup>. Given the call for more sustained global efforts to  
40 118 better target interventions for oxygen systems in LMICs, such as through the Lancet Commission on  
41 119 medical oxygen security and others, a more succinct exploration of oxygen use in LMICs is required.<sup>9</sup>  
43 120

44 121 The objectives of O2CoV2 are to: 1) characterize the type and duration of different modalities of oxygen  
45 122 therapy and respiratory support consumed by patients with severe and critical COVID-19 2) describe  
46 123 demographics and outcomes of hospitalized patients with COVID-19 and 3) describe facility level oxygen  
47 124 production capacity. All objectives are aimed to further inform a future WHO-supported platform trial  
48 125 of respiratory support strategies.  
50

51 126  
52 127 **Methods and analysis**

53 128 STROBE cohort reporting guidelines were used.<sup>10</sup>  
54

55 129 **Study design**  
56  
57  
58  
59  
60

130 The master protocol serves to describe an observational cohort study from June 2021 through June  
 131 2023 that will be implemented in 30 countries representing four low-and-middle income countries  
 132 (LMICs) from each of the six WHO regions, and targeting up to 4 hospitals per country. LMICs will be  
 133 defined as per 2021 World Bank criteria and codes “UMC”, “LMC” and “LIC”<sup>11</sup>:  
 134

| Code | Description                                                                             |
|------|-----------------------------------------------------------------------------------------|
| HIC  | World Bank high-income economies (GNI per capita of USD 12,696 or more in 2020)         |
| UMC  | World Bank upper middle-income economies (GNI per capita of USD 4,096 - 12,695 in 2020) |
| LMC  | World Bank lower middle-income economies (GNI per capita of USD 1,046 - 4,095 in 2020)  |
| LIC  | World Bank low-income economies (GNI per capita of USD 1,045 or less in 2020)           |

135

### 136 Study site selection

137 To recruit interest in participation, WHO put out a global call for expressions of interest to global clinical  
 138 research networks, social media, WHO website and WHO internal communications through headquarters,  
 139 regional offices, and country offices. An information sheet about the study was provided for public use  
 140 on WHO study website<sup>12</sup>. Expressions of interest were requested to include information about previous  
 141 experience with WHO and clinical research, research staff, and COVID-19 burden. See Annex 1.

142 Site selection was conducted by the WHO O2CoV2 International Study Steering Committee (ISSC) in July  
 143 2021<sup>13</sup>. Study sites were limited to health facilities where patients with severe and critical COVID-19 are  
 144 cared for, including hospitals and temporary COVID-19 treatment centres. The following considerations  
 145 were considered when selecting sites: WHO region of country; income status of the country (per World  
 146 Bank criteria); previous history of conducting research before; having dedicated research staff; having  
 147 identified a paired site. The African and American regions underwent sub-regional division prior to site  
 148 randomization to have at least 1 country within each subregion of the continent. Finally, EOIs were  
 149 randomized among regions.

### 150 Study population and enrolment

151 Sites are invited to start enrolling patients as soon as possible, considering need for completion of  
 152 ethical procedures and trainings. Sites began patient recruitment in January 2022 and should continue  
 153 enrolment until target sample size is reached or maximum 30 days of recruitment, whichever happens  
 154 first.

### 155 Participant eligibility criteria:

- 156 1. Age greater than 12 years.
- 157 2. Suspected SARS-CoV-2 infection as determined by treating clinical provider or confirmed SARS-  
 158 CoV-2 infection confirmed virologically in the laboratory by reverse transcription polymerase  
 159 chain reaction (RT-PCR) via nasopharyngeal or oropharyngeal sample or by SARS-CoV-2 Ag-RDTs  
 160 that meet the minimum performance requirements of  $\geq 80\%$  sensitivity and  $\geq 97\%$  specificity  
 161 compared with a nucleic acid amplification test (NAAT) reference assay.
- 162 3. Admitted to health care facility within 24 hours.
- 163 4. Receiving supplemental oxygen or showing clinical evidence of need for supplemental respiratory  
 164 support as reflected in a respiratory rate  $\geq 30$  breaths per minute or an  $SpO_2 \leq 90\%$ ,  $SpO_2 < 94\%$  if  
 165 any emergency signs are present.

1  
2  
3 166 5. Committed to full supportive care.  
4 167

5 168 **Study procedures**

6  
7 169 **Screening**

8  
9 170 Patients will be screened for inclusion over a maximum of 30 days or until the site level sample size is  
10 171 met, whichever comes sooner. During the recruitment window, patients will be screened for inclusion  
11 172 in the study 24 hours per day, 7 days per week, as they enter the facility for acute care in an emergency  
12 173 unit or area of the hospital that functions like an emergency unit. An information note (see Annex 2)  
13 174 about the study will be posted at all potential areas where screening will occur; thus, informing  
14 175 potential patients that they are being screened and may be enrolled in study. A daily screening log  
15 176 (Annex 3) will be maintained to capture daily numbers of patients screened and those that are  
16 177 enrolled.  
17 178

18 178  
19 179 **Observational period**

20  
21 180 Patients who meet the inclusion criteria for enrolment will be visited once a day for up to 7 days for  
22 181 daily clinical data collection, or until outcome occurs, whichever happens first. Designated study data  
23 182 collector will review the patient bedside chart and observe the patient and surroundings to collect  
24 183 relevant data.

25  
26 184 Data collection will occur daily using an electronic case report form (eCRF) and data entry platform  
27 185 (REDCap) on a WHO-provided tablet computer. See Annex 3 for all CRFs.

28 185  
29 186 **Follow-up phase**

30  
31 187 In cases where the patient remains in hospital more than 7 days, then the data collector will visit the  
32 188 patient each additional day until the patient hospital outcome up to 30 days maximum, to assess only  
33 189 vital status, and, at that time, complete the outcome form.

34 189  
35 190 **Link to the platform trial**

36 190  
37 191 Through the conduct of the cohort study an established dialogue with site investigators will have been  
38 192 established. For the platform trial, expressions of interest to participate in the full trial will be sought  
39 193 and a final decision will be based on site interest and site capacity as determined in this cohort study.

40 193  
41 194 **Statistical analysis**

42 194  
43 195 All analyses will be conducted in R (R: A Language and Environment for Statistical Computing, R Core Team,  
44 196 R Foundation for Statistical Computing, Vienna, Austria 2020, <https://www.R-project.org>).

45 196  
46 197 **Missing data**

47 197  
48 198 For each analysis, the denominator will represent data that are available. To impute missing data, random  
49 199 forest imputation will be considered.

50 199  
51 200 **Sample size**

52 200  
53 201 To maximise statistical power, we aim to recruit as many participants as possible. The larger the sample,  
54 202 the greater the precision and generalization of the results, and thus for descriptive analyses we aim for



203 at least 125 patients per hospital, a maximum total of 4,500 patients. For inferential analyses, sample  
204 size estimates suggest a minimum of 1,380 patients to attain 95% statistical power to achieve  
205 hypotheses discussed with the ISSC.

### 206 **Selection bias**

207 To minimize selection bias, the following are introduced:

- 208 a) systematic and randomized site selection procedure (described above);
- 209 b) specific objective criteria for participant study eligibility (described above);
- 210 c) waiver of informed consent (see ethical considerations).

211

### 212 **Outcomes**

213 To characterize the type and duration of different modalities of oxygen therapy and respiratory support  
214 consumed by patients with severe and critical COVID-19, the following outcomes will be reported:

- 215 • Baseline characteristics of patients;
- 216 • Hospital outcomes of patients;
- 217 • Total of patients receiving respiratory support daily and proportion of patients receiving various  
218 delivery devices: nasal cannula, face mask, Venturi, non-rebreather, HFNC, CPAP, bilevel positive  
219 airway pressure (BiPAP), non-invasive ventilation (NIV), invasive mechanical ventilation (IMV).
- 220 • Proportion of patients progressing to IMV.
- 221 • Description of respiratory support over time, with subgroup analysis by disease severity, and  
222 associations between facility type or patient characteristics.
- 223 • Quantification of total oxygen requirements will be estimated by daily oxygen use as from data  
224 collected on flow rates, fraction of inspired oxygen (FiO<sub>2</sub>), positive end expiratory pressure (PEEP).

225

226 Sankey plots for patient trajectories will be used to describe the proportion and duration of each type of  
227 respiratory support intervention overall and in subgroup of disease severity. Multistate models will be  
228 used to quantify duration of stay in, and transition probabilities across, modes of respiratory support  
229 distinguishing absence, nasal or facial, HFNC, IMV, with death and discharge from hospital as absorbing  
230 states. Multivariable models will be used to predict transition to IMV or death based on patient and  
231 facility characteristics at the time of hospital admission. The following characteristics will be considered:  
232 age, chronic conditions, need for oxygen on day of transition and facility.

233 The amount of oxygen used for each patient will be computed using the following formulas:

- 234 • For nasal cannula, face mask and non-rebreather mask, FiO<sub>2</sub> is assumed to be 1.0 and flow rates  
235 are adjustable in litres per minute (LPM). Litres per day consumption of oxygen = device flow  
236 rate L/minute x 60 minutes/hr x 24 hr/day.
- 237 • For HFNC FiO<sub>2</sub> is adjustable (defaulted to 1.0) and flow rate is adjustable in LPM. Litres per day  
238 consumption of oxygen = device flow rate L/minute x 60 minutes/hr x 24 hr/day; flow rate in  
239 LPM = device flow rate x (FiO<sub>2</sub> - 0.21)/0.79.
- 240 • For ventilator, CPAP, BiPAP/non-invasive positive pressure ventilation (NIPPV), FiO<sub>2</sub> is adjustable  
241 (defaulted to 1.0) and flow rate is adjustable in LPM and dependent on multiple factors. Litre  
242 per day consumption of oxygen = device oxygen consumption rate L/minute x 60 minutes/hr x  
243 24 hr/day. Device oxygen consumption rate in LPM = (minute ventilation + (bias flow x RR x  
244 expiratory time/60) + leak) x (FiO<sub>2</sub> - 0.21)/0.79.

245 To describe oxygen source, distribution and biomedical equipment at facility level and estimated oxygen  
246 capacity at the facility level, descriptive statistics for relevant variables and quantification of total oxygen  
247 supply at each facility will be determined.

248  
249 Full statistical analysis plan available in Annex 4.

250  
251 **Study administration**

252 **Data collection and management**

253 Standardized case record forms (CRFs) are available and include:

- 254 • screening form;
- 255 • case identification and demographics form;
- 256 • initial case information form;
- 257 • daily follow-up form (to be filled in day 2–7 or until outcome if sooner);
- 258 • daily vital status form (to be filled in day 8–30 or until outcome if sooner);
- 259 • case outcome form; and
- 260 • facility form.

261  
262 WHO will support data management and access to data entry platform REDCap, that will be stored in a  
263 secure WHO server housed in Geneva. The WHO team, within the capacity of research strengthening,  
264 will support the development of local data platforms. Implementing partners can opt to manage data on  
265 site or through the central WHO repository, subject to local circumstances.

266  
267 Each participant will be linked to an anonymous study ID within the REDCap database. A locally  
268 designated data manager will be sent a password-protected copy of the online database (anonymized  
269 and without any patient identifiers) for data analysis.

270  
271 For local data collection which may occur on paper, all data must be stored in a password-protected  
272 database or kept in a locked storage in accordance with national regulations. An identification log will be  
273 used, and this log will be stored in a secure, locked facility within the study country. The location of and  
274 responsibility for local database(s) will be determined on a case-to-case basis and dependent on  
275 national regulations.

276  
277 All essential study documents, including CRFs, will be electronically archived and retained at WHO for 3  
278 years or for the duration required by the national laws and regulations at local research centres. This is  
279 to enable completion of the study, to conduct and complete data curation processes, and to finalize the  
280 publication and archival process. The sharing of anonymized data will be done using standard WHO data  
281 sharing agreements (see Annex 5) with each study site.

282  
283 **Study personnel at sites: roles and responsibilities**

- 284 • PIs at all sites will be responsible for the submission and approval process of protocols to  
285 institutions.
- 286 • Study investigator team will be responsible for all aspects of protocol implementation, including  
287 screening, enrolment, daily data collection over 7 days, and follow up until hospital discharge, and  
288 facility on-time assessment.

- 1  
2  
3 289 • Clinicians and hospital staff at sites will be minimally impacted as separate data collecting  
4 290 personnel should be hired to collect information and not directly interact in patient care.  
5 291 • If the above is not feasible, the potential source of bias will be acknowledged in the report. Note:  
6 292 excluding such sites would likely result in exclusion of sites with the most limited resources, which  
7 293 is the focus of the study and the trial.  
8 294

9 295 WHO will serve as central coordinator of all sites and staff will support implementation of the study in all  
10 296 sites, including good clinical practice training.  
11 297

#### 12 298 **Patient and public involvement statement:**

13 299 As part of WHO usual practice, public and patients were engaged in the development of this protocol via  
14 300 the WHO Clinical Characterization and Management working group which led to the voluntary formation  
15 301 of the Respiratory Support Research Working Group, who edited this protocol.  
16 302

#### 17 303 **Ethics and dissemination**

18 304 **Ethics approval:** World Health Organization AdHoc Covid-19 Research Ethics Review Committee  
19 305 (CERC.0040)  
20 306

#### 21 307 **Ethics**

22 308 WHO ERC has determined that this master protocol meets the Council for International Organizations  
23 309 of Medical Sciences (CIOMS) criteria justifying a waiver of consent. When this protocol is adopted at  
24 310 specific country sites, national ERCs may make a different determination regarding consent in  
25 311 accordance with their respective national research ethics guidelines, for example, requiring modified  
26 312 consent or full individual consent as appropriate.  
27 313

28 314 A waiver of consent is suggested, whereupon each study site can then consider consent exemptions  
29 315 according to national ethical review boards (ERBs). We kindly request this for the following reasons:

- 30 316 • **One, the research would not be feasible or practicable to carry out if informed consent were**  
31 317 **required.** Our objective is to understand current practice, including capacity and limitations. To do  
32 318 this reliably, we need to have rudimentary data on the entire population at risk, and not simply  
33 319 those who are able to provide consent. A biased estimate, such as would result from the  
34 320 requirement that data only be collected from patients who have provided consent, will provide an  
35 321 inaccurate picture of capacity, resources and outcomes at sites which in turn would not only  
36 322 compromise the data, but also pose potential risk to patients recruited to the trial. As well, by  
37 323 virtue of their illness, patients are often unable to provide first-party consent, and third-party  
38 324 consent is challenging because of restrictions on visiting.  
39 325 • **Two, this research has important social value.** Understanding the nature of the challenge in  
40 326 resource-limited settings is a prerequisite to developing approaches to address these. Respiratory  
41 327 insufficiency is the dominant cause of death for patients with COVID-19, and so understanding its  
42 328 management has compelling social value.  
43 329 • **Three, this research poses no more than minimal risks to participants.** We seek waiver of  
44 330 consent for data collection only; no specific study interventions will be undertaken. Further we  
45 331 will record only basic physiological data and location in the hospital, and not personal health  
46 332 information that might be identifying or stigmatizing. Finally, all data are anonymized, and linked  
47 333 to patient identity only through a linkage log that will be maintained **securely at study sites.**  
48  
49  
50  
51  
52  
53  
54  
55  
56  
57  
58  
59  
60

- 1  
2  
3 334 • **Four, ERCs at national level will have full authority to request waiver of consent as per national**  
4 335 **protocols.**  
5 336 • **Five, an information note will be posted in all areas where potential screening may occur.** Annex  
6 337 2 is an information note that can be posted in all areas where potential screening may occur and  
7 338 includes simple language that can be translated into local languages for local ERB approval.  
8 339

10 340 It is of the utmost importance that participant confidentiality be maintained throughout the study. This  
11 341 study will use standard methods in order to protect the confidentiality of participants. All study  
12 342 participants will be assigned a unique, pre-defined study identification number by the investigation  
13 343 team for the labelling of questionnaires for attribution of data to an individual subject and study site.  
14 344 The study will remove all identifiers from any data collected for this study at the individual and study  
15 345 site levels. No names or other directly identifying information, including addresses or medical  
16 346 information, will be entered in the regional or global databases. Study identification numbers will be  
17 347 linked to investigator records stored separately in a secured, locked cabinet and making it possible to  
18 348 identify the case in order to correct missing or erroneous data, in accordance with institutional  
19 349 requirements.  
20 350

### 23 351 **Outputs and dissemination**

24 352 Each site will be invited to share their anonymized data for pooled analysis and will also be able to  
25 353 publish their own data independently. To protect patient identity, any publications or presentations  
26 354 relating to the study will use only aggregate summary data. Further, after obtaining agreement from  
27 355 each study site, the use of the master protocol and harmonized collection of data will allow for pooled  
28 356 analyses, which in turn will contribute to rapid knowledge generation and strengthen the power of the  
29 357 data analysis to make recommendations. Reporting forms of site-specific results is up to individual  
30 358 investigators and should follow Strengthening the Reporting of Observational Studies in Epidemiology  
31 359 (STROBE) guidelines for cohort studies and ideally be reported in such a way to allow for comparison of  
32 360 data across different study sites.  
33 361

34 362 At the global level, dissemination will be done in the standard ways to inform clinical management and  
35 363 WHO guideline development work. Findings from the global pooled analysis will be presented in reports  
36 364 and peer-reviewed publications.  
37 365

38 366 Authorship will be determined using accepted international approaches, according to International  
39 367 Committee of Medical Journal Editors recommendations  
40 368 ([http://www.icmje.org/recommendations/browse/roles-and-responsibilities/defining-the-role-of-](http://www.icmje.org/recommendations/browse/roles-and-responsibilities/defining-the-role-of-authors-and-contributors.html)  
41 369 [authors-and-contributors.html](http://www.icmje.org/recommendations/browse/roles-and-responsibilities/defining-the-role-of-authors-and-contributors.html)), commensurate to contributions made.  
42 370

### 43 371 **Author Contributions**

44 372 PR and DA conceived the study and wrote the first draft; PR, JD, SR, JM designed the study. SC and SDR  
45 373 developed the statistical analysis plan. YA, WS, PC co-chaired the O2CoV2 Steering Committee and  
46 374 provided methodologic inputs. The Respiratory Research Working Group reviewed the document,  
47 375 contributed to drafts and made editorial suggestions. The O2CoV2 Steering Committee reviewed the  
48 376 document and made editorial and methodological suggestions. PR, JD, YA, JM, PC, WS, DA, SM  
49 377 approved final version for submission.  
50 378

1  
2  
3 379 **Acknowledgements:**

4 380 \*WHO Respiratory Support Research Working Group: Neill Adhikari, Diptesh Aryal, Tim Baker,  
5 381 Devasahayam J Christopher, Rob Fowler, Martha Gartley, Ewan Goligher, Rshan Haniffa, Devachandran  
6 382 Jayakumar, Richard H Kallet, Richard Kojan, Arthur Kwizera, Jie Li, Armand Mekontso-Dessap, Christian  
7 383 Paletta, Ingrid Lara Rendon, Elisabeth Riviello, Jorge Salluh, Jonathan A C Sterne, Bruno Martins  
8 384 Tomazini, Bharath Kumar Tirupakuzhi Vijayaraghavan, Fernando Zampieri.

9 385  
10 386 \*\*WHO O2CoV2 International Study Steering Committee: Gasim Amrahli, John Appiah, Diptesh Aryal,  
11 387 Neale Batra, Kieran Bligh, Devasahayam J Christopher, Mohammed Derow, Laura Alejandra Velez Ruiz  
12 388 Gaitan, Itziar Carrasco Garcia, Bridget Griffith, Christophe Guitton, Madiha Hashmi, Rashidatu Kamara,  
13 389 Leticia Kawano-Dourado, Chiori Kodama, Richard Kojan, Gary Kuniyoshi, Arthur Kwizera, Maria Mendes,  
14 390 Dina Pfeifer, Cinzia De Brito Procopio, Ingrid Lara Rendon, Ludovic Reveiz, Elisabeth Riviello, Matthieu  
15 391 Rolland, Amadou Seck, Elizabeth Stanway, Julie Viry, Pushpa Wijesinghe.

16 392  
17 393 **Data statement**

18 394 All study forms available in Annex 3.

19 395  
20 396 **Funding statement**

21 397 This writing of this protocol received no specific grant from any funding agency in the public, commercial  
22 398 or not-for-profit sectors.

23 399  
24 400 **Competing interests statement**

25 401 None declared.

26 402  
27 403 **Trial registration number** Clinicaltrials.gov number NCT04918875.

1  
2  
3 404 **References**  
4 405

- 5 406 1. WHO Director-General's opening remarks at the media briefing on COVID-19 - 11 March 2020.  
6 407 2020. [https://www.who.int/director-general/speeches/detail/who-director-general-s-opening-remarks-](https://www.who.int/director-general/speeches/detail/who-director-general-s-opening-remarks-at-the-media-briefing-on-covid-19---11-march-2020)  
7 408 [at-the-media-briefing-on-covid-19---11-march-2020](https://www.who.int/director-general/speeches/detail/who-director-general-s-opening-remarks-at-the-media-briefing-on-covid-19---11-march-2020)  
8  
9 409 2. Organization WH. WHO Model List of Essential Medicines for Adults, April 2002. 2002.  
10 410 3. Organization. WH. WHO Model List of Essential Medicines for Children , October 2007. 2007.  
11  
12 411 4. Organization. WH. Biomedical equipment for COVID-19 case management - inventory tool:  
13 412 Interim guidance. 2020.  
14  
15 413 5. Organization WH. WHO Oxygen Access Scale Up Initiative.  
16 414 <https://www.who.int/initiatives/oxygen-access-scale-up>  
17 415 6. Organization WH. A Coordinated Global Research Roadmap. Global Forum on research and  
18 416 innovation for COVID-19.  
19  
20 417 7. Jaspard M, Sow MS, Juchet S, et al. Clinical presentation, outcomes and factors associated with  
21 418 mortality: A prospective study from three COVID-19 referral care centres in West Africa. *Int J Infect Dis.*  
22 419 Jul 2021;108:45-52. doi:10.1016/j.ijid.2021.05.024  
23 420 8. Barasa EW, Ouma PO, Okiro EA. Assessing the hospital surge capacity of the Kenyan health  
24 421 system in the face of the COVID-19 pandemic. *PLoS One.* 2020;15(7):e0236308.  
25 422 doi:10.1371/journal.pone.0236308  
26 423 9. Kitutu FE, Rahman AE, Graham H, et al. Announcing the Lancet Global Health Commission on  
27 424 medical oxygen security. *Lancet Glob Health.* Nov 2022;10(11):e1551-e1552. doi:10.1016/S2214-  
28 425 109X(22)00407-7  
29 426 10. von Elm E, Altman DG, Egger M, et al. The Strengthening the Reporting of Observational Studies  
30 427 in Epidemiology (STROBE) Statement: guidelines for reporting observational studies. *Int J Surg.* Dec  
31 428 2014;12(12):1495-9. doi:10.1016/j.ijsu.2014.07.013  
32 429 11. New World Bank country classifications by income level: 2021-2022.  
33 430 12. Organization WH. WHO O2COV2 Information sheet for potential implementing sites.  
34 431 13. Organization. WH. International Study Steering Committee Terms of Reference.  
35  
36  
37  
38  
39  
40  
41  
42  
43  
44  
45  
46  
47  
48  
49  
50  
51  
52  
53  
54  
55  
56  
57  
58  
59  
60

# Oxygen requirements and approaches to respiratory support in patients with COVID-19 in low- and middle-income countries: a WHO study

## Annexes

### Contents

|                                                                          |    |
|--------------------------------------------------------------------------|----|
| Annex 1. Expression of interest .....                                    | 2  |
| Annex 2. Site information sheet for public posting visibly in sites..... | 3  |
| Annex 3. Case report form .....                                          | 4  |
| Annex 4. Statistical Analysis Plan .....                                 | 28 |
| Annex 5. Data sharing agreement .....                                    | 58 |

Peer review only



## Annex 1. Expression of interest

### WHO Respiratory support research in low- and middle-income countries: Expression of interest (to be filled by interested facilities)

The WHO Respiratory Support Research Working Group, part of the Clinical Characterization and Management of COVID-19, has developed protocols for two studies designed to address the optimal respiratory support of patients with severe COVID-19 in LMICs:

1. An observational (cohort) study to understand current practice, limitations, experience and outcomes.
2. A randomized clinical trial to test the ability of a variety of approaches to reduce mortality and the need for intubation and mechanical ventilation.

We are looking for sites who can recruit patients to both the cohort study and the trial. If you and your site are interested in being involved, please provide us with the following information:

Name: \_\_\_\_\_

Email address: \_\_\_\_\_

Site(s): \_\_\_\_\_

City/Region: \_\_\_\_\_

Country: \_\_\_\_\_

Have you/your site previously participated in clinical research?

Observational studies: Yes \_\_\_\_ No \_\_\_\_

If yes, approximate number: 1–2 \_\_\_\_ 3–5 \_\_\_\_ 6 or more \_\_\_\_

If yes, were any of the studies you participated in linked to WHO?

Yes \_\_\_\_ No \_\_\_\_

If yes which ones?

Clinical trials: Yes \_\_\_\_ No \_\_\_\_

If yes, approximate number: 1–2 \_\_\_\_ 3–5 \_\_\_\_ 6 or more \_\_\_\_

If yes, were any of the studies you participated in linked to WHO?

Yes \_\_\_\_ No \_\_\_\_

If yes which ones?

Who collects data or recruits patients at your site? (check all that apply)

Medical doctors \_\_\_\_

Nurses \_\_\_\_

Trainees \_\_\_\_

Dedicated research staff \_\_\_\_

Other \_\_\_\_

On average, how many patients with COVID-19 have you admitted monthly in the past 3 months? \_\_\_\_

May we contact you to discuss the opportunity further?

Yes \_\_\_\_ No \_\_\_\_

Any additional comments? \_\_\_\_\_

Thanks for your input.





## Annex 2. Site information sheet for public posting visibly in sites

### WHO Respiratory Support Research Working Group Observational Study Information sheet for public posting at site

The World Health Organization (WHO) is conducting an observational research study of low- and middle-income country (LMIC) sites to examine baseline practices and resources for oxygen and respiratory care for patients with COVID-19.

This study will help the global community understand the current practices around oxygen use and help support a future study about advanced respiratory support interventions.

#### **This site is enrolled in this study.**

Patients who meet eligibility criteria will automatically be enrolled in the study. Eligibility criteria are:

1. Have suspected or confirmed COVID-19.
2. 12 years age or older.
3. Determined by treating clinician to require admission to facility.
4. Determined by treating clinician to require oxygen or has fast respiratory rate or low oxygen saturation.

Daily information about patients will be collected for the first 7 days of hospitalization and once again at hospital discharge. If you are discharged before 7 days, then it will be shorter. If you are hospitalized more than 7 days then you will be visited once a day until your discharge.

The types of information collected will be vital signs and details about the type of oxygen support you may be treated with such as how much oxygen are you being treated with, what kind of face mask or pressure mask is being used to give you the oxygen.



### Annex 3. Case report form

Confidential

Respiratory support observational study - Screening/Recruitment  
Page 1

#### A\_Case screening

Screening ID: \_\_\_\_\_

Date and time screening is initiated \_\_\_\_\_

Data collector username: \_\_\_\_\_

Name of data access group/facility: \_\_\_\_\_

Identifier of data access group/facility: \_\_\_\_\_

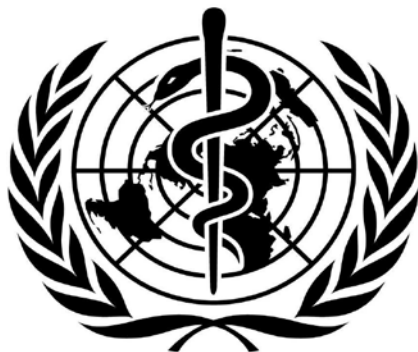

# World Health Organization

WHO O2CoV2 Screening Form

1a. How old is the patient?

(If patient is under 1 year of age, enter age as "999")

This patient is not eligible for this study. Please thank them for their time and proceed to the next patient for screening by:

Mark this form status as "Complete" Select "Save and Exit Form" Select "Create New Record"

2a. Does the patient have suspected or confirmed SARS-CoV-2 infection, as determined by treating clinical provider?  Yes  No

This patient is not eligible for this study. Please thank them for their time and proceed to the next patient for screening by:

Mark this form status as "Complete" Select "Save and Exit Form" Select "Create New Record"



Confidential

Page 2

3a. Is this patient being admitted to the health care facility or was the patient admitted to the health care facility in the last 24 hours?

Yes

No

(Being admitted is defined as the patient being expected to stay at least overnight.)

This patient is not eligible for this study. Please thank them for their time and proceed to the next patient for screening by:

Mark this form status as "Complete" Select "Save and Exit Form" Select "Create New Record"

4a. Is the patient:

Yes

No

Receiving supplemental oxygen OR With a respiratory rate of  $\geq 30$  breaths per minute OR With a SpO<sub>2</sub>  $\leq$  90% on room air OR With a SpO<sub>2</sub>  $<$  94 % and any one of the following emergency signs are present:

Obstructed or absent breathing Severe respiratory distress Central cyanosis Shock Coma and/or convulsions

This patient is not eligible for this study. Please thank them for their time and proceed to the next patient for screening by:

Mark this form status as "Complete" Select "Save and Exit Form" Select "Create New Record"

5a. Is the patient committed to full supportive care?

Yes

No

(Full supportive care is defined as the patient is amenable to advanced oxygen support, as is able to be provided at the facility.)

This patient is not eligible for this study. Please thank them for their time and proceed to the next patient for screening by:

Mark this form status as "Complete" Select "Save and Exit Form" Select "Create New Record"

This patient is eligible to be enrolled in the study. This patient should now be assigned a linking identifier and proceed to enrolment.

Please enter the patient's linking identifier below then proceed to screening the next patient by:

Mark this form status as "Complete" Select "Save & Exit Form" Select "Create New Record"

6a. Linking identifier:

(Use this field to uniquely identify the patient to the data collector who will continue with enrollment into the study.)



## B\_Case Identification Demographics

Enrolment record ID: \_\_\_\_\_

Data collector username: \_\_\_\_\_

Data access group name: \_\_\_\_\_

Data access group identifier (numeric): \_\_\_\_\_

Time of form start: \_\_\_\_\_  
(Tap NOW when form is started.)

Screening identifier: \_\_\_\_\_  
(Select screening identifier from dropdown list)

1b. Linking identifier: \_\_\_\_\_  
(Use this field to uniquely identify the patient, from the data collector who screened the patient into the study.)

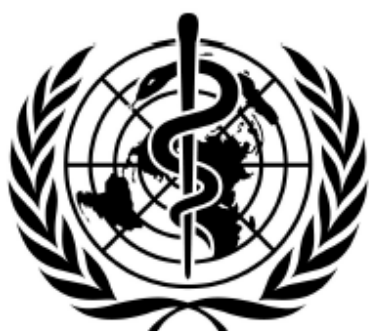

# World Health Organization

WHO O2CoV2 Enrolment Form

2b. Is the patient enrolled in the study?  Yes  No

This patient is not enrolled in this study. Please thank them for their time and proceed to the next patient.

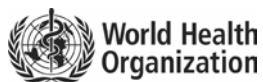

3b. Please include comments or instructions on how to identify the patient for daily follow up here. Please do not write patient name or medical record/chart number.

(Please do not write patient name or medical record/chart number.)

4b. Date of birth:

(Write in DD/MM/YYYY format.)

5b. Age (years):

Age (years) calculated

The date of birth and age provided are not equal. Please check the age and date of birth provided.

6b. Sex:

- Female  
 Male  
 Other

7b. Other sex:

8b. Height (centimetres):

(Write in centimetres without unit label.)

9b. Weight (kilograms):

(Write in kilograms without unit label.)

b. BMI

10b. Is the patient pregnant?

- Yes  
 No

11b. Date of last menstrual period:

(Write in DD/MM/YYYY format.)

### Patient's Past Medical History

12b. Chronic cardiac disease (not hypertension)

- Yes  
 No  
 Unknown

13b. Hypertension

- Yes  
 No  
 Unknown

14b. Chronic obstructive pulmonary disease (COPD)

- Yes  
 No  
 Unknown



15b. Asthma  Yes  
 No  
 Unknown

16b. Chronic liver disease  Yes  
 No  
 Unknown

17b. Chronic kidney disease (moderate or severe)  Yes  
 No  
 Unknown

18b. Chronic neurological disease  Yes  
 No  
 Unknown

19b. AIDS or person living with HIV  Yes  
 No  
 Unknown

19b-2. Is the patient currently on ART (antiretroviral therapy)?  Yes  
 No  
 Unknown

20b. Diabetes mellitus  Yes  
 No  
 Unknown

21b. Current smoking  Yes  
 No  
 Unknown

22b. Tuberculosis (active and/or previous infection)  Yes  
 No  
 Unknown

23b. Asplenia  Yes  
 No  
 Unknown

24b. Cancer (any type, active in the past 6 months)  Yes  
 No  
 Unknown

25b. Cancer (any type, greater than 6 months remission)  Yes  
 No  
 Unknown

26b. Dementia  Yes  
 No  
 Unknown

27b. Mental illness (excluding Dementia)  Yes  
 No  
 Unknown

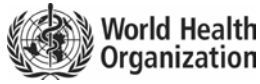

28b. Other

- Yes
- No
- Unknown

29b. Other past medical history:

\_\_\_\_\_

**General Comments**

30b. Comments

\_\_\_\_\_

Time of form completion:

\_\_\_\_\_  
(Tap NOW when form is completed.)

Time to complete form:

\_\_\_\_\_

Please mark the form status as "Complete", then select "Show More Save Options", then "Save & Go to Next Form"

ew only



## C\_Initial case information

Enrolment record ID:

\_\_\_\_\_

### Initial case information (facility arrival/emergency unit)

Time of form start:

\_\_\_\_\_ (Tap NOW when form is started.)

1c. Date of arrival to this facility:

\_\_\_\_\_ (Write in DD/MM/YYYY format.)

2c. Time of arrival to this facility:

\_\_\_\_\_

3c. Was this patient referred or transferred from another facility?

- Yes  
 No

4c. Name of facility where patient referred or transferred from:

\_\_\_\_\_

5c. Date of arrival to previous facility:

\_\_\_\_\_ (Write in DD/MM/YYYY format.)

The date entered is not valid, because it is in the future. Please check the information and re-enter the date.

6c. COVID-19 status:

- Suspected  
 Confirmed

7c. Date of most recent COVID-19 positive test:

\_\_\_\_\_ (Write in DD/MM/YYYY format.)

The date entered is not valid, because it is in the future. Please check the information and re-enter the date.

8c. By which method was the patient's SARS-CoV-2 infection confirmed on [date\_covid]?

- RT-PCR via nasopharyngeal or oropharyngeal sample  
 SARS-CoV-2 Ag-RDTs that meet the minimum performance requirements of  $\geq 80\%$  sensitivity and  $\geq 97\%$  specificity compared to a NAAT reference assay  
 Blood  
 Other method

9c. Other method:

\_\_\_\_\_

10c. Has the patient received a COVID-19 vaccine?

- Yes  
 No  
 Unknown





1  
2  
3  
4  
5  
6 11c. How many COVID-19 vaccines have been received?  1  
7  2  
8  3  
9  More than 3

10 12c. When was the last vaccine received?  
11 \_\_\_\_\_  
12

13 **General comments**

14 13c. Comments  
15  
16 \_\_\_\_\_  
17

18 Time of form completion:  
19 \_\_\_\_\_  
20 (Tap NOW when form is completed.)

21 Please mark the form status as "Complete" then select "Show More Save Options", and select "Save & Go to Next  
22 Form" to complete the daily data (Form D1) for this patient.

23 Time to complete form:  
24 \_\_\_\_\_  
25  
26  
27  
28  
29  
30  
31  
32  
33  
34  
35  
36  
37  
38  
39  
40  
41  
42  
43  
44  
45  
46  
47  
48  
49  
50  
51  
52  
53  
54  
55  
56  
57  
58  
59  
60



Confidential

Respiratory support observational study - Enrolment, Daily Data Collection, Outcome  
Page 1

## D1\_Daily case information (Day 1-7)

Enrolment record ID:

1d. Please select the day of data collection for which you are completing this form.

- Day 1 (day of enrolment)  
 Day 2  
 Day 3  
 Day 4  
 Day 5  
 Day 6  
 Day 7

Time of form start:

\_\_\_\_\_

{Tap NOW when form is started.}

### Daily, from hospital admission to hospital day number 7

2d. Today's date and current time:

\_\_\_\_\_

{Write in DD/MM/YYYY H:M:S format.}

3d. Location of patient:

- Emergency unit  
 Ward  
 ICU  
 Other

4d. Other location:

5d. Day and time of most recent vital signs:

\_\_\_\_\_

This day and time is not valid, because it is in the future. Please check the information and enter the correct day and time.

6d. Mental status (AVPU):

- Alert  
 Verbal  
 Pain  
 Unresponsive

7d. Systolic blood pressure (mmHg):

\_\_\_\_\_

{Write in mmHg, without unit label. Example) "70"}

8d. Oxygen saturation:

\_\_\_\_\_

{Write in %, without % symbol. Example) "70"}

9d. Heart rate (beats/minute):

\_\_\_\_\_

{Write in beats/minute, without unit label. Example) "50"}

*Confidential*

Page 2

10d. Patient positioning:

- Prone  
 Sitting (Fowler's)  
 Semi-Fowler's  
 Lateral  
 Lying flat on back

11d. Oxygen therapy modality:

- Room air  
 Nasal cannula  
 Simple face mask  
 Venturi mask  
 Non-rebreather mask  
 Hi-flow nasal cannula  
 CPAP  
 BiPAP  
 Intubated  
 Other

12d. Other oxygen therapy modality:

\_\_\_\_\_

13d. Oxygen source:

- Cylinder  
 Concentrator  
 Piped/wall oxygen  
 Other

14d. Other oxygen source:

\_\_\_\_\_

15d. Select CPAP type:

- Bubble  
 Nasal pillows  
 Helmet  
 Full face mask

16d. CPAP pressure setting:

\_\_\_\_\_

{Write in cm H<sub>2</sub>O without unit label. Example} "5"

17d. Select BiPAP type:

- Nasal pillows  
 Helmet  
 Full face mask

18d. IPAP (inspiratory positive airway pressure):

\_\_\_\_\_

{Write in cm H<sub>2</sub>O without unit label. example} "5"

19d. EPAP (expiratory positive airway pressure):

\_\_\_\_\_

{Write in cm H<sub>2</sub>O without unit label. Example} "5"

20d. Oxygen flow rate (litres/minute):

\_\_\_\_\_

{Write in litres/minute, without unit label. Example} "50"

21d. Fraction of inspired oxygen (FiO<sub>2</sub>):

\_\_\_\_\_

{Write in %, without % symbol. Example} "50"  
Reminder: FiO<sub>2</sub> of room air is 21%

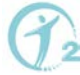*Confidential*

Page 3

22d. Peak airway pressure (in cm H<sub>2</sub>O):

\_\_\_\_\_ (Write in cm H<sub>2</sub>O without unit label. Example) "50")

23d. Positive end expiratory pressure (in cm H<sub>2</sub>O):

\_\_\_\_\_ (Write in cm H<sub>2</sub>O without unit label. Example) "5")

24d. Tidal volume (in mL):

\_\_\_\_\_ (Write in mL without unit label. Example) "500")

25d. What is the ventilator mode?

- Volume control  
 Pressure control  
 Synchronized intermittent mandatory ventilation (SIMV)  
 Pressure support  
 Other

26d. Other ventilator mode:

\_\_\_\_\_

27d. Leakage compensation:

- On  
 Off

28d. Expiratory time:

\_\_\_\_\_ (Provide value if available.)

29d. Respiratory rate (breaths/minute):

\_\_\_\_\_ (Record the patient's natural rate of breathing (breaths/minute))

30d. Respiratory rate (breaths/minute):

\_\_\_\_\_ (Record the patient's respiratory rate as visible on machine (breaths/minute))

31d. Take picture of brand and model number of oxygen delivery device.

\_\_\_\_\_ (Please do not include the patient's face in the image)

32d. In the past 24 hours, has the oxygen supply system for this patient changed (new cylinder, new concentrator, etc)?

- Yes  
 No

33d. In the past 24 hours, how many times has pulse oximetry been checked?

\_\_\_\_\_ (Write in whole numbers without units.)



Confidential

Page 4

### Mortality Data

34d. Has patient died since yesterday?  Yes  
 No

35d. Date of death

\_\_\_\_\_ (Write in DD/MM/YYYY format.)

This date is not valid, because it is in the future. Please check the information and enter the correct date.

36d. What was the cause of death?  Respiratory  
 Non-respiratory  
 Not determined

### General comments

37d. Comments

\_\_\_\_\_ Please mark the form status as "Complete", then "Save & Exit Form"

After completion of this form, please:

Mark this form status as "Complete" Select "Save and Exit Form" Select Form E from the menu to complete the outcome form for this patient

\_\_\_\_\_ Please mark the form status as "Complete", then "Save & Exit Form"

Time of form completion:

\_\_\_\_\_ (Tap NOW when form is completed.)

Time to complete form:

\_\_\_\_\_



World Health  
Organization



Confidential

Respiratory support observational study - Enrolment, Daily Data Collection, Outcome  
Page 1

## D2\_Daily case information (Day 8-30)

Enrolment record ID:

---

Today's date/time

---

1d. Is the patient still in the hospital?

Yes

No

Please mark the form status as "Complete", then "Save & Exit Form"

After completion of this form, please:

Mark this form status as "Complete" Select "Show More Save Options" Select "Save & Go to Next Form" to complete the outcome form (Form E) for this patient



Confidential

Respiratory support observational study - Enrollment, Daily Data Collection, Outcome  
Page 1

## E\_Outcome/completion

Enrolment record ID: \_\_\_\_\_

### Study Completion Information

Time of form start: \_\_\_\_\_

(Tap NOW when form is started.)

1e. What is the status of the patient in the study?

- Completed  
 Not completed

2e. Date of end of patient enrolment (completed or not completed)

(Write in DD/MM/YYYY format.)

This date is not valid, because it is in the future. Please check the information and enter the correct date.

3e. Reason patient did not complete study:

- Non-compliance / did not wish to continue in the study  
 Left against medical advice  
 Transferred  
 Otherwise lost to follow up  
 (Lost to follow up includes patients with unknown or unrecorded outcome.)

4e. Clinical status at hospital discharge:

- Dead  
 Alive- Clinically improved  
 Alive- Not clinically improved  
 (Alive- Clinically improved may mean discharged to home, rehab facility, long term care facility;  
 Alive-Not clinically improved may mean transferred to hospice or referral to other hospital.)

5e. At any point in the patient's stay, was any SARS-CoV-2 variant detected on their lab test?

- Yes  
 No  
 Unknown/Unable to detect SARS-CoV-2 variants at this facility

6e. If yes, which variant was detected?

- Alpha  
 Beta  
 Gamma  
 Delta  
 Other

7e. Other variant detected: \_\_\_\_\_

8e. Was the patient discharged from hospital with supplemental oxygen?

- Yes  
 No



Confidential

Page 2

9e. Select supplemental oxygen source[s]:

- Cylinder
- Concentrator
- Other

(Check all that apply.)

10e. Other supplemental oxygen source:

\_\_\_\_\_

11e. Select oxygen delivery device[s]:

- Nasal cannula
- Simple face mask
- Venturi mask
- Non-rebreather mask
- CPAP/BiPAP
- Other

(Check all that apply.)

12e. Other oxygen delivery device:

\_\_\_\_\_

13e. Was the patient discharged from hospital with a pulse oximeter?

Yes

No

**General Comments**

14e. Comments

\_\_\_\_\_

Time of form completion:

\_\_\_\_\_

(Tap NOW when form is completed.)

Time to complete form:

\_\_\_\_\_

Please mark the form status as "Complete", then select "Save & Exit Form"



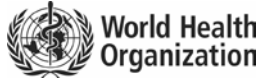

Confidential

Respiratory support observational study - Facility information  
Page 1

## F\_Facility information

Facility ID:

---

Time form started:

{Press NOW when form is started.}

Name of data access group/facility name:

---

Identifier of data access group/facility name:

---

Data collector username

---

### Facility Information

1f. GPS coordinates (Latitude):

{Click "update" when in facility.}

2f. GPS coordinates (Longitude):

{Click "update" when in facility.}

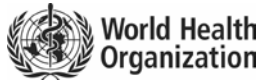

World Health  
Organization



Confidential

Page 2

3f. Country:

- Argentina
  - Armenia
  - Bangladesh
  - Brazil
  - Colombia
  - Democratic Republic of Congo
  - Egypt
  - El Salvador
  - India
  - Indonesia
  - Iran
  - Jordan
  - Kazakhstan
  - Lebanon
  - Malawi
  - Mongolia
  - Nepal
  - Nigeria
  - Pakistan
  - Papua New Guinea
  - Peru
  - Philippines
  - Republic of Moldova
  - Serbia
  - South Africa
  - Thailand
  - Uganda
  - Uzbekistan
  - Viet Nam
- (Begin writing country name and select from dropdown menu.)

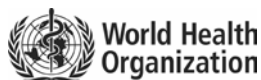

Confidential

Page 3

4f. Facility name:

- Cliniques Universitaires De Kinshasa
- Centre Hospitalier Monkole
- Clairwood hospital
- King Edward VIII Hospital
- Steve Biko Academic Hospital
- Tshwane District Hospital
- Federal Medical Centre Abeokuta
- General Hospital Ijaiye Abeokuta
- University of Calabar Teaching Hospital
- General Hospital Calabar
- Lira Regional Referral Hospital
- Lira University Hospital
- Hoima Regional Referral Hospital
- Entebbe Regional Referral Hospital
- Queen Elizabeth Central Hospital
- Chiradzulu Hospital
- Blantyre District Health Center
- Hospital Italiano de Buenos Aires
- Hospital Italiano de San Justo Agustin Rocca
- COVID-19 Hospital Center/Instituto Nacional de Infectologia Evandro Chagas/Fiocruz
- Family Health Primary care clinic Manguinhos
- Hospital das Clínicas of the Federal University of Pernambuco
- Centro de Pesquisa Clínica / GEP
- Clínica Colsanitas
- Puente Aranda
- Hospital Nacional El Salvador
- Hospital Nacional Zacamil
- Hospital de Huaycan
- Centro de Salud La Fraternidad
- Kafrelsheikh University
- Anesthesia and intensive care department
- Tohid hospital Sanandaj
- Kamyaran Hospital
- King Abdulla University Teaching Hospital
- Princess Basma Hospital
- Hospital 1, Lebanon
- Hospital 2, Lebanon
- Ziauddin university
- Sheikh Zayed Medical College Rahim Yar Khan
- Aga Khan University Hospital, Stadium Road, Karachi, Sindh
- Aga Khan Medical Centre, Gilgit-Baltistan
- Yerevan State Medical University after Mkhitar Heratsi, Heratsi n. 1 hospital complex
- Regional Clinical Hospital Karaganda
- Karaganda Medical University, Medical University Clinic of the NJSC
- Institute for Emergency medicine IMU, Chisinau
- Hospital for Communicable diseases
- Clinical Hospital Medical Center Bezzanijska Kosa
- Zangiata specialized clinic №2 for the treatment of patients with coronavirus infection
- Ambulance station
- Chittagong Medical College Hospital
- Chittagong General Hospital
- Cumilla Medical College Hospital
- Hospital 1, Indonesia
- Hospital 2, Indonesia
- B P Koirala Institute of Health Sciences
- Udaypur District Hospital
- Kirtipur Hospital
- Primary Health Care Center supported by Phect Nepal
- Thai Red Cross Emerging Infectious Disease Clinical Center
- King Chulalongkom Memorial Hospital
- Maharaj Nakorn ChiangMai
- Chiang Mai Neurological Hospital

01-09-2021 08:46

For peer review only - <http://bmjopen.bmj.com/site/about/guidelines.xhtml>

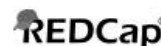



- Father Muller Medical College Hospital  
 Thumbay Speciality Rural hospital, Father Muller Salvadore Monteiro Rural health centre, Bajpe  
 JSS Medical College  
 District Hospital, Mysuru  
 National Hospital For Tropical Diseases in Hanoi  
 Bac Thang Long Hospital  
 Oxford University Clinical Research Unit  
 Hospital for Tropical Diseases and National Hospital for Tropical Diseases  
 Pacific International Hospital  
 Lae International Hospital  
 State First Central Hospital  
 General hospital of Tuv province  
 Southern Philippines Medical Center  
 Mamay Inn and TTMF facilities in the Davao Region  
 Lung Center of the Philippines  
 (Begin writing facility name and select from dropdown menu.)

5f. City:

\_\_\_\_\_  
(Write full official city name.)

6f. Facility level:

- First level hospital (District)  
 Second level hospital (Regional/provincial)  
 Tertiary level hospital (Referral/academic)  
 Other

7f. Other facility level:

\_\_\_\_\_

8f. What is the managing authority of the facility?

- Public  
 Private for profit  
 Private not for profit  
 Other  
 (Check all that apply.)

9f. Other managing authority:

\_\_\_\_\_

10f. Is electricity available 24 hours a day and 7 days a week?

- Yes  
 No

11f. Facility electricity source:

- Grid electricity connection  
 Generator  
 Solar  
 Other  
 (Check all that apply.)

12f. Other electricity source:

\_\_\_\_\_

13f. Number of total beds in facility:

\_\_\_\_\_  
(Beds = space and mattress/gurneys. Include all bed types (adult and paediatric))

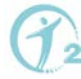

Confidential

Page 5

14f. Number of critical care beds in facility:

{Beds = space and mattress/gurney designated for patients who are critically ill; this should include space for resuscitation and rapid provision of oxygen}

15f. Total number of ventilators in facility:

{This should include all ventilators, including invasive, non-invasive, transport and others.}

16f. Select ventilator types available to this facility:

- Invasive mechanical ventilators  
 CPAP/BiPAP  
 High flow nasal cannula (HFNC)  
 Other (including transport)  
 (Check all that apply.)

17f. Number of invasive mechanical ventilators:

\_\_\_\_\_

18f. Number of CPAP/BiPAP devices:

\_\_\_\_\_

19f. Number of high flow nasal cannula (HFNC) devices:

\_\_\_\_\_

20f. Number of other ventilators (including transport):

\_\_\_\_\_

21f. Is the facility capable of testing or receiving testing information on SARS-CoV-2 variants?

- Yes  
 No  
 Unknown

22f. Number of biomedical experts (biomedical engineers/clinical engineers/technicians):

{Biomedical experts are professionals who have been trained in the setup, use, maintenance, and troubleshooting of medical devices.}

23f. Number of clinicians who can manage respiratory failure (intubation, mechanical ventilation, management of complications, etc):

{These clinicians may be doctors or nurses who have specialty training in ICU, anaesthesia, emergency medicine, etc.}



Confidential

Page 6

For the following questions, please refer to this image of oxygen supply types.

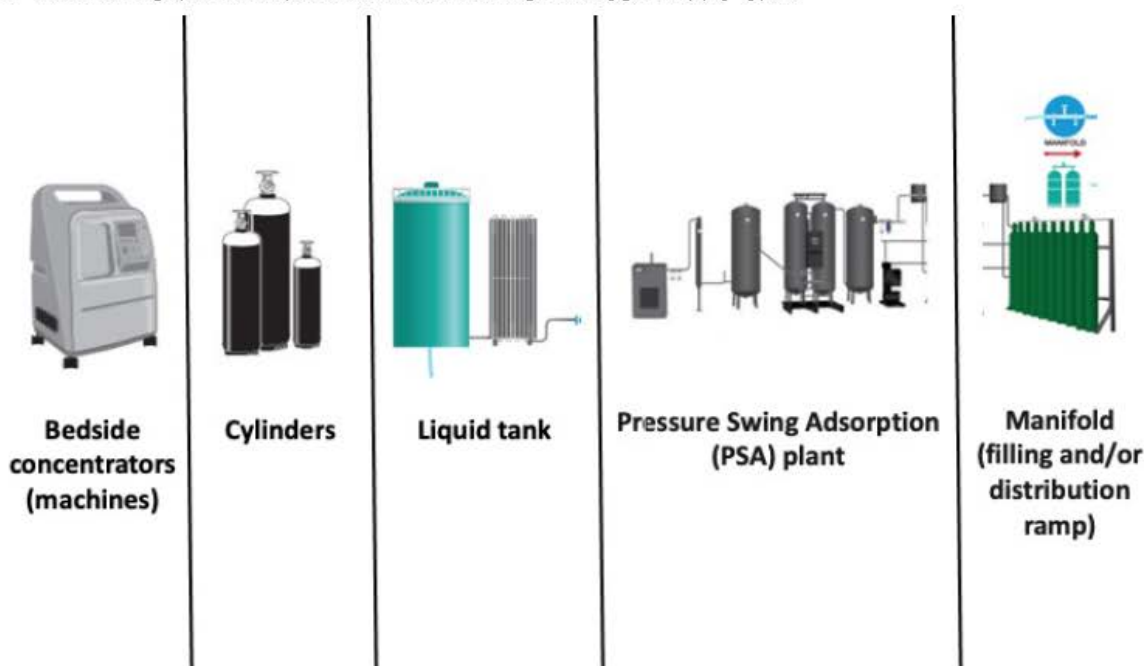

24f. Which of the following oxygen supply systems are present in the facility?

- Bedside concentrators (machines)
  - Cylinders
  - Liquid tank system
  - Piping
  - PSA system
  - Manifold (filling and/or distribution ramp)
  - Other
- (Check all that apply.)

25f. Other oxygen supply system:

\_\_\_\_\_

26f. How many concentrators are in the hospital?

\_\_\_\_\_

27f. What capacity do the concentrators have in litre/minute (L/min)?

- 5 L/min
  - 8 L/min
  - 10 L/min
  - Other
- (Check all that apply.)

28f. Other capacity:

\_\_\_\_\_ (Write in litres/min.)

29f. Are cylinders filled on site or off site?

- On-site
  - Off-site
- (Check all that apply.)



Confidential

For the following question, please refer to this image of an oxygen outlet:



30f. How many oxygen outlets are there per bed?

{See image above for reference. The color of the oxygen outlet may differ in your country/region.}

31f. What oxygen source is the piping connected to?

- PSA system
  - Liquid tank system
  - Manifold (distribution ramp)
- {PSA=Pressure Swing Adsorption. Check all that apply.}

For the following question, please refer to this image of an oxygen plant:

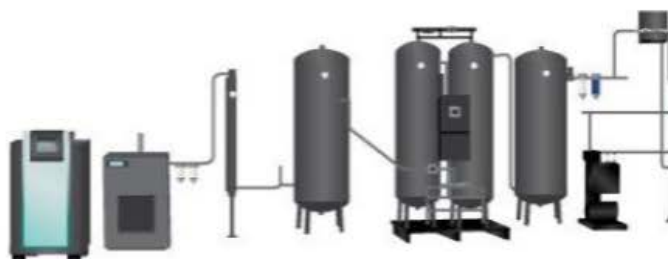



Confidential

Page 8

32f. What is the PSA system configuration?

- Single oxygen generator plants
- Duplex oxygen generator plants
- Triplex oxygen generator plants
- Other

(Single generator plants will have a single configuration including only one booster and set of tanks, as in the photo depicted. Duplex generator plants will have two configurations in parallel, including two boosters and set of tanks. These configurations may join at an air compressor junction. Triplex generator plants will have three configurations in parallel, including three boosters and set of tanks. These configurations may join at an air compressor junction.)

33f. Other PSA system configuration:

\_\_\_\_\_

34f. What is the oxygen production capacity of the PSA system?

\_\_\_\_\_ ( If applicable, write the production capacity of each oxygen generator plant, separated with a semicolon (;). Write number[s] without units.)

35f. Indicate if the oxygen production capacity is recorded in metres cubed/hour(m<sup>3</sup>/hr) or litres/minute(L/min):

- metres cubed/hour (m<sup>3</sup>/hr)
- litres/minute (L/min)

36f. What is the quantity of liquid oxygen contracted for the facility per month?

\_\_\_\_\_ (Write in whole numbers without units.)

37f. Indicate if the quantity of liquid oxygen is recorded in tons/month, metres cubed(m<sup>3</sup>)/month, or litres/month:

- tons/month
- metres cubed (m<sup>3</sup>)/month
- litres/month

38f. Is the PSA plant active 24 hours per day and 7 days per week?

- Yes
  - No
- (Passive Swing Adsorption (PSA) - generation of enriched oxygenation from ambient air)

39f. How many days per week does the PSA plant function?

\_\_\_\_\_ (Write number of days without unit label.)

40f. How many hours per day does the PSA plant function?

\_\_\_\_\_ (Write in number of hours without unit label.)



For the following questions, please refer to this image of sizes of oxygen cylinders.



WHO-UNICEF technical specifications and guidance for oxygen therapy devices:  
[http://www.who.int/medical\\_devices/whounicef/tech\\_specs\\_oxygen\\_therapy\\_devices/en/](http://www.who.int/medical_devices/whounicef/tech_specs_oxygen_therapy_devices/en/)

41f. What is the monthly consumption of 340 litre cylinders?

{See above image for reference. Enter number of cylinders. Example: 4. If you do not have this cylinder size, write 0.}

42f. What is the monthly consumption of 680 litre cylinders?

{See above image for reference. Enter number of cylinders. Example: 4}

43f. What is the monthly consumption of 1360 litre cylinders?

{See above image for reference. Enter number of cylinders. Example: 4}

44f. What is the monthly consumption of 3400 litre cylinders?

{See above image for reference. Enter number of cylinders. Example: 4}

45f. What is the monthly consumption of 6800 litre cylinders?

{See above image for reference. Enter number of cylinders. Example: 4}

## Annex 4. Statistical Analysis Plan

### Statistical analysis plan

---

Oxygen requirements and approaches to respiratory support  
in patients with COVID-19 in low- and middle-income  
countries:  
a WHO study

---

VERSION 2.5  
7 December 2022

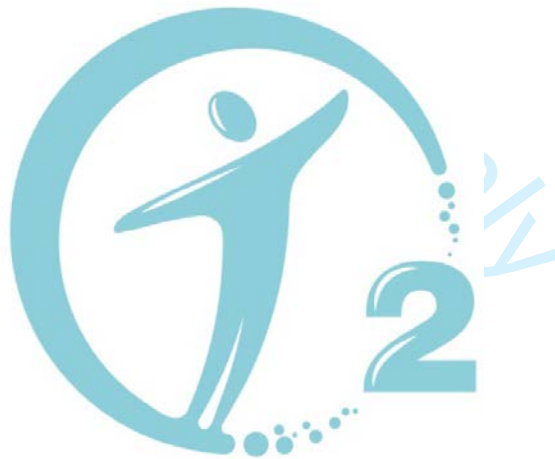



## Contents

|                                                       |                              |
|-------------------------------------------------------|------------------------------|
| <b>Version control</b>                                | <b>30</b>                    |
| <b>Acknowledgements</b>                               | Error! Bookmark not defined. |
| <b>Abbreviations</b>                                  | <b>31</b>                    |
| <b>1. Introduction</b>                                | <b>32</b>                    |
| <b>Plan objective</b> .....                           | <b>32</b>                    |
| <b>Study characteristics</b> .....                    | <b>32</b>                    |
| <b>2. Objectives of the analysis</b>                  | <b>33</b>                    |
| <b>Overall aim of the study</b> .....                 | <b>33</b>                    |
| <b>Primary objectives</b> .....                       | <b>33</b>                    |
| Objective 1.1                                         | 33                           |
| Objective 1.2                                         | 33                           |
| <b>Secondary objectives</b> .....                     | <b>33</b>                    |
| Objective 2.1                                         | 33                           |
| Objective 2.2                                         | 34                           |
| Objective 2.3                                         | 34                           |
| Objective 2.4                                         | 34                           |
| <b>3. Endpoints</b>                                   | <b>34</b>                    |
| <b>Study endpoints for primary objectives</b> .....   | <b>34</b>                    |
| <b>Study endpoints for secondary objectives</b> ..... | <b>34</b>                    |
| <b>4. Statistical methods for specific objectives</b> | <b>35</b>                    |
| <b>Primary objectives</b> .....                       | <b>35</b>                    |
| Summary descriptive                                   | 35                           |
| Respiratory support transitions                       | 35                           |
| <b>Secondary objectives</b> .....                     | <b>36</b>                    |
| <b>5. Missing data</b>                                | <b>46</b>                    |
| <b>6. Sample size</b>                                 | <b>46</b>                    |
| <b>7. Statistical software</b>                        | <b>57</b>                    |
| <b>References</b>                                     | <b>57</b>                    |



## Version control

| Version | Approval date     | Important changes from previous version                                                                                                                                                                                            | Initials |
|---------|-------------------|------------------------------------------------------------------------------------------------------------------------------------------------------------------------------------------------------------------------------------|----------|
| 1.0     | 15 September 2021 | Initial version                                                                                                                                                                                                                    | SDR      |
| 1.1     | 24 January 2022   | Include more states in the multistate model and sample size recalculation                                                                                                                                                          | SDR      |
| 2.0     | 23 February 2022  | Recalculate sample size and harmonize objectives with research protocol version 5.2, 20 February 2022                                                                                                                              | SDR      |
| 2.2     | 6 July 2022       | Include the scenario of facility level variables as confounders                                                                                                                                                                    | SDR      |
| 2.3     | 27 October 2022   | Recalculate sample size including percentage ICU beds as covariate and correcting GPower input parameters. Include power analysis. Added the two Cox proportional hazard models (patient level and facility level characteristics) | MR       |
| 2.4     | 25 November 2022  | Adjust figures according to suggestions made by copyeditor                                                                                                                                                                         | MR       |
| 2.5     | 7 December 2022   | Final technical edit                                                                                                                                                                                                               | PR       |

Notes: Sara Domínguez Rodríguez (SDR): Lead biostatistician (September 2021 – July 2022)

Matthieu Rolland (MR): Lead biostatistician (July 2022 – present)

Pryanka Relan: Global study focal point (2020 – present)



## Abbreviations

|                  |                                            |
|------------------|--------------------------------------------|
| BiPAP            | bilevel positive airway pressure           |
| CI               | confidence interval                        |
| COVID-19         | SARS-CoV-2 coronavirus disease             |
| CPAP             | continuous positive airway pressure        |
| DSMB             | Data and Safety Monitoring Board           |
| FiO <sub>2</sub> | fraction of inspired oxygen                |
| HFNC             | high-flow nasal cannula                    |
| HR               | <b>hazard ratio</b>                        |
| ICU              | <b>intensive care unit</b>                 |
| IMV              | invasive mechanical ventilation            |
| IQR              | interquartile range                        |
| LMICs            | low- and middle-income countries           |
| LPM              | litres per minute                          |
| LR               | logistic regressions                       |
| NIPPV            | non-invasive positive pressure ventilation |
| NIV              | non-invasive ventilation                   |
| OR               | odds ratio                                 |
| PEEP             | positive end-expiratory pressure           |
| RR               | respiratory rate                           |
| SAP              | statistical analysis plan                  |
| SD               | standard deviation                         |
| SpO <sub>2</sub> | peripheral oxygenation saturation          |



## 1. Introduction

### Plan objective

This statistical analysis plan (SAP) provides a detailed and comprehensive description of the main, pre-planned analysis for the study “Oxygen requirements and approaches to respiratory support in patients with COVID-19 in low- and middle-income countries: a WHO study”. This study has been undertaken by an international research consortium and is fully described in the research protocol version 5.2, 20 February 2022.

This SAP contains a detailed description of data summaries and presentations of statistical results. Major changes in the statistical methodology used for the main and pre-planned analyses would, however, require amendment and re-approval of this SAP by the research consortium and study Data and Safety Monitoring Board (DSMB) or a detailed description and justification in the statistical analysis report.

### Study characteristics

The severe acute respiratory syndrome coronavirus 2 (SARS-CoV-2) has been identified as the cause of a respiratory illness, officially named COVID-19. COVID-19 was described as a pandemic on 11 March 2020.

It is estimated that approximately 20% of those infected with COVID-19 require oxygen supportive therapy. Oxygen is an essential medicine and has been listed as such on the WHO Essential Medicines List and Essential Medicines List for Children. Still, the availability of supplemental medical oxygen in low- and middle-income countries (LMICs) remains a challenge. The COVID-19 pandemic has highlighted, more than ever, the acute need for scale-up of oxygen therapy. WHO has provided an inventory tool to quantify facility-level provision of infrastructure to deliver oxygen therapy. Detailed data on the use of oxygen therapy in LMICs at the patient level remain lacking.

In February 2020, the Research and Development Blueprint for COVID-19 identified key research areas needed for understanding this new disease. Clinical research, including that specifically on the types of respiratory support required by patients, was identified as a key research priority. Since mid 2020, the WHO COVID-19 Clinical Characterization and Management Research Group has been developing two research protocols to support the understanding of respiratory support practices and oxygen requirements for the clinical management of COVID-19.



- The first is an observational study to describe oxygen requirements and respiratory support practices in facilities caring for patients with COVID-19 in LMICs.
- The second is an interventional platform trial which seeks to compare modalities of respiratory support (e.g. continuous positive airway pressure [CPAP], high-flow nasal cannula [HFNC], awake prone position, and other interventions?).

Selection of the most relevant interventions requires an understanding of current practice and expertise in sites that might recruit patients to the trial. Existing studies collect data on oxygen mode of delivery but do not characterize the type, quantity and duration of each modality's use at the patient level, to give a better understanding of oxygen therapy modalities in current use in LMICs.

## 2. Objectives of the analysis

### Overall aim of the study

To describe oxygen use, requirements and respiratory support interventions at the facility level in LMICs. This information will be used to further inform a future platform trial of respiratory support strategies.

### Primary objectives

#### Objective 1.1

Characterize the type and duration of different modalities of oxygen therapy and respiratory support delivered to patients with severe and critical COVID-19.

#### Objective 1.2

To quantify the duration of stay in, describe practice patterns and transition probabilities across, modes of respiratory support, distinguishing absence, nasal or facial, HFNC, invasive mechanical ventilation (IMV), with death and discharge from hospital as absorbing states.

### Secondary objectives

#### Objective 2.1

To quantify the amount ( $m^3$ ) of oxygen delivered to patients with severe and critical COVID-19.



## Objective 2.2

To describe the demographics and outcomes at hospital discharge of this cohort of hospitalized patients. For this, we will collect minimal demographic information (age, sex, chronic disease and pregnancy), daily oxygen saturation (SpO<sub>2</sub>) and respiratory rate (RR), and outcome data at hospital discharge.

## Objective 2.3

To describe the resources at the facility level for oxygen delivery and respiratory support. For this, we will collect basic facility-level information about oxygen production, distribution and biomedical equipment availability using the WHO Biomedical Inventory Tool.

## Objective 2.4

To describe the impact of facility resources on outcome at hospital discharge. For this, we will collect facility-level information on: electricity, biomedical staff, clinical staff who can manage respiratory failure.

## 3. Endpoints

### Study endpoints for primary objectives

- Total number of patients receiving respiratory support daily and proportion of patients receiving various delivery devices: nasal cannula, face mask, Venturi, non-rebreather, HFNC, CPAP, bilevel positive airway pressure (BiPAP), non-invasive ventilation (NIV), IMV (Objective 1.1).
- The proportion of patients with each of the respiratory supports over the 7 days of follow-up, with subgroup analysis by disease severity, and associations between facility type or patient characteristics (Objective 1.2).

### Study endpoints for secondary objectives

- Quantification of total oxygen delivered will be estimated by daily oxygen use for each patient from data collected on flow rates, the fraction of inspired oxygen (FiO<sub>2</sub>), positive end-expiratory pressure (PEEP) (Objective 2.1).





World Health  
Organization



- Quantification of total oxygen supply among the 7 days of follow-up stratified by type of device (low-flow oxygen therapy, HFNC, NIV/CPAP and IMV), and region (African, Americas, South-East Asia, European, Eastern Mediterranean and Western Pacific) (Objective 2.1).
- Demographics and outcome characteristics at hospital discharge (Objective 2.2).
- Facility-level information about oxygen production, distribution, biomedical equipment availability (Objective 2.3) and electricity, biomedical staff and clinical staff who can manage respiratory failure (Objective 2.4).

## 4. Statistical methods for specific objectives

### Primary objectives

#### Summary descriptive

In order to describe the study sample, baseline characteristics and output overall, columns will be included to summarize all subjects within the study (Objective 1.1). In summary tables of continuous variables, interquartile ranges (IQR) and medians will be assessed. In summary tables of categorical variables, counts and percentages will be used. The denominator for each percentage will be the number of subjects within the population group excluding missing observations unless otherwise specified. See **Table 1** and **Table 2** for descriptions of admission characteristics. Chi-squared and Fisher Tests will be performed for categorical variables. For normally distributed continuous variables, the Student T-test will be performed and non-parametric tests such as U-Mann Whitney or Kruskal Wallis when non-normally distributed. All hypothesis testing will be carried out at the 5% significance level and *P* values will be rounded to three decimal places. In summary tables, *P* values less than 0.001 will be reported as  $< 0.001$  as implemented in compareGroups R package (1).

#### Respiratory support transitions

To describe the changes in respiratory support over time (Objective 1.2), Sankey plots will be used to describe patient trajectories, describing the proportion and duration of each type of respiratory support. Kaplan-Meier models will be used to estimate the

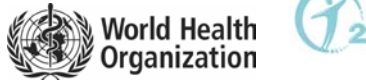

probability of each transition during the follow-up time of the study. The hospital outcomes and time to event outcomes will be described in **Table 3**.

A multistate model will be used to study the course of hospital stay of the study population. The focus of the analysis will be on evaluating transitions of escalating respiratory support and transitions to the absorbing states. Multistate models are structures that represent different disease categories or states and the movement of patients between these states (transitions). In this model, summarized in **Fig. 1**, patients may enter the study in one of the three initial transient states: State A: No oxygen therapy or standard oxygen therapy (nasal cannula, face mask or non-rebreather mask); State B: HFNC, NIV or CPAP; and State C: IMV. The model will also include two absorbing states from which a patient no longer transitions: discharge alive and recover (State D) and dead (State E). From State A, a patient can either transition to State B (HFNC/NIV/CPAP), State C (IMV), discharge/recover, or die. From State B (HFNC/NIV/CPAP), a patient can transition into IMV, discharge, or die. From State C (IMV), a patient can transition to discharge/recover or die. Formally the course of a patient's stay is described with a time-in homogeneous Markov chain given by  $\{X(t), t \geq 0\}$  with finite state space  $S = \{1, 2, 3, 4, 5, 6, 7, 8, 9\}$  and follow-up time  $\tau$ .  $X(t)$  denotes the state occupied at time  $t$ . Various estimands are of interest. We will define the probability to move from one state to another within the multistate model. To perform this multistate model, the *mstate* R package(2) will be used to estimate the transition and state occupation probabilities for patients over the course of their hospital stay. The *mstate* package employs Aalen-Johansen estimator based on Markov assumptions.

A multivariable regression model will be used to predict each transition based on the following characteristics: age, gender, vaccination and comorbidities at the time of hospital admission, SpO<sub>2</sub> on the day of the transition, the percentage of intensive care unit (ICU) beds in the facility, and a random intercept at the facility level. The output of the multistate model will be summarized using a forest plot as in **Fig. 2** describing the hazard ratios (HR) and 95% of confidence interval (CI) for each baseline covariate in each transition. Stacked transition probabilities at 7 days after admission will be plotted.

## Secondary objectives

The amount of oxygen used for each patient will be computed using the following formula:

- For nasal cannula, face mask and non-rebreather mask, FiO<sub>2</sub> is assumed to be 1.0 and flow rates are adjustable in litres per minute (LPM). Litres per day consumption of oxygen = device flow rate L/minute x 60 minutes/hr x 24 hr/day.



- For HFNC  $\text{FiO}_2$  is adjustable (defaulted to 1.0) and flow rate is adjustable in LPM. Litres per day consumption of oxygen = device flow rate L/minute x 60 minutes/hr x 24 hr/day; flow rate in LPM = device flow rate x  $(\text{FiO}_2 - 0.21)/0.79$ .
- For ventilator, CPAP, BiPAP/non-invasive positive pressure ventilation (NIPPV),  $\text{FiO}_2$  is adjustable (defaulted to 1.0) and flow rate is adjustable in LPM and dependent on multiple factors. Liter per day consumption of oxygen = device oxygen consumption rate L/minute x 60 minutes/hr x 24 hr/day. Device oxygen consumption rate in LPM = (minute ventilation + (bias flow x RR x expiratory time/60) + leak) x  $(\text{FiO}_2 - 0.21)/0.79$ .

This amount of oxygen used for each patient will then be summarized according to oxygen modality, severity and region, as in **Fig. 3**. Different panels will be displayed for box plots summarizing medians and IQR. Comparisons between each stratum will be done using the Kruskal Wallis test (Objective 2.1). Baseline characteristics and overall output columns will be included to summarize all subjects at discharge. In summary tables of continuous variables, IQR and medians will be assessed. In summary tables of categorical variables, counts and percentages will be used. The denominator for each percentage will be the number of subjects within the population group without taking into account missing observations unless otherwise specified. Chi-squared and Fisher Tests will be performed for categorical variables. For normally distributed continuous variables, the Student T-test will be performed and U-Mann Whitney or Kruskal Wallis when non-parametric. All hypothesis testing will be carried out at the 5% significance level and *P* values will be rounded to three decimal places (Objective 2.2). An additional multivariate Cox proportional hazard model will be performed where the outcome is time to death, and the covariates are age, gender, vaccination, comorbidities and  $\text{SpO}_2$  at the time of hospital admission, the percentage of ICU beds in the facility, and a random intercept at the facility level. All these covariates will be included in the model and no variable selection process will be performed, as these covariates were all identified as being clinically relevant (Objective 2.2). To describe the oxygen source, distribution, biomedical equipment and oxygen capacity at the facility level, data will be displayed as a whole and summarized by each region and level of facility (Objective 2.3). See **Table 4** for descriptions of oxygen supply at each facility. In summary tables, *P* values less than 0.001 will be reported as < 0.001, as implemented in compareGroups R package (1). To assess the impact of facility-level resources, a multivariate Cox proportional hazard model will be performed where the outcome is time to death, and where the covariates will include: electricity, biomedical staff and clinical staff who can manage respiratory failure. All these covariates will be included

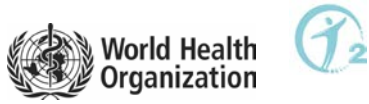

1  
2  
3  
4 in the model and no variable selection process will be performed, as these covariates were  
5  
6 all identified as being clinically relevant (Objective 2.4).  
7  
8  
9  
10  
11  
12  
13  
14  
15  
16  
17  
18  
19  
20  
21  
22  
23  
24  
25  
26  
27  
28  
29  
30  
31  
32  
33  
34  
35  
36  
37  
38  
39  
40  
41  
42  
43  
44  
45  
46  
47  
48  
49  
50  
51  
52  
53  
54  
55  
56  
57  
58  
59  
60

For peer review only



Fig. 1. Multistate model

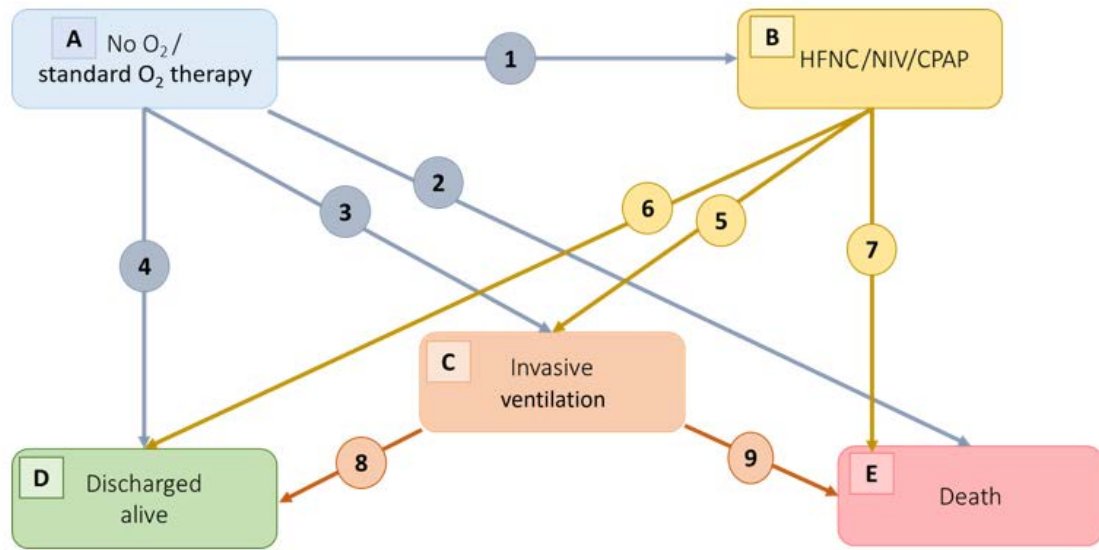

Peer review only

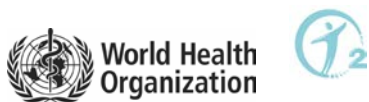

Fig. 2. Output from the multistate model

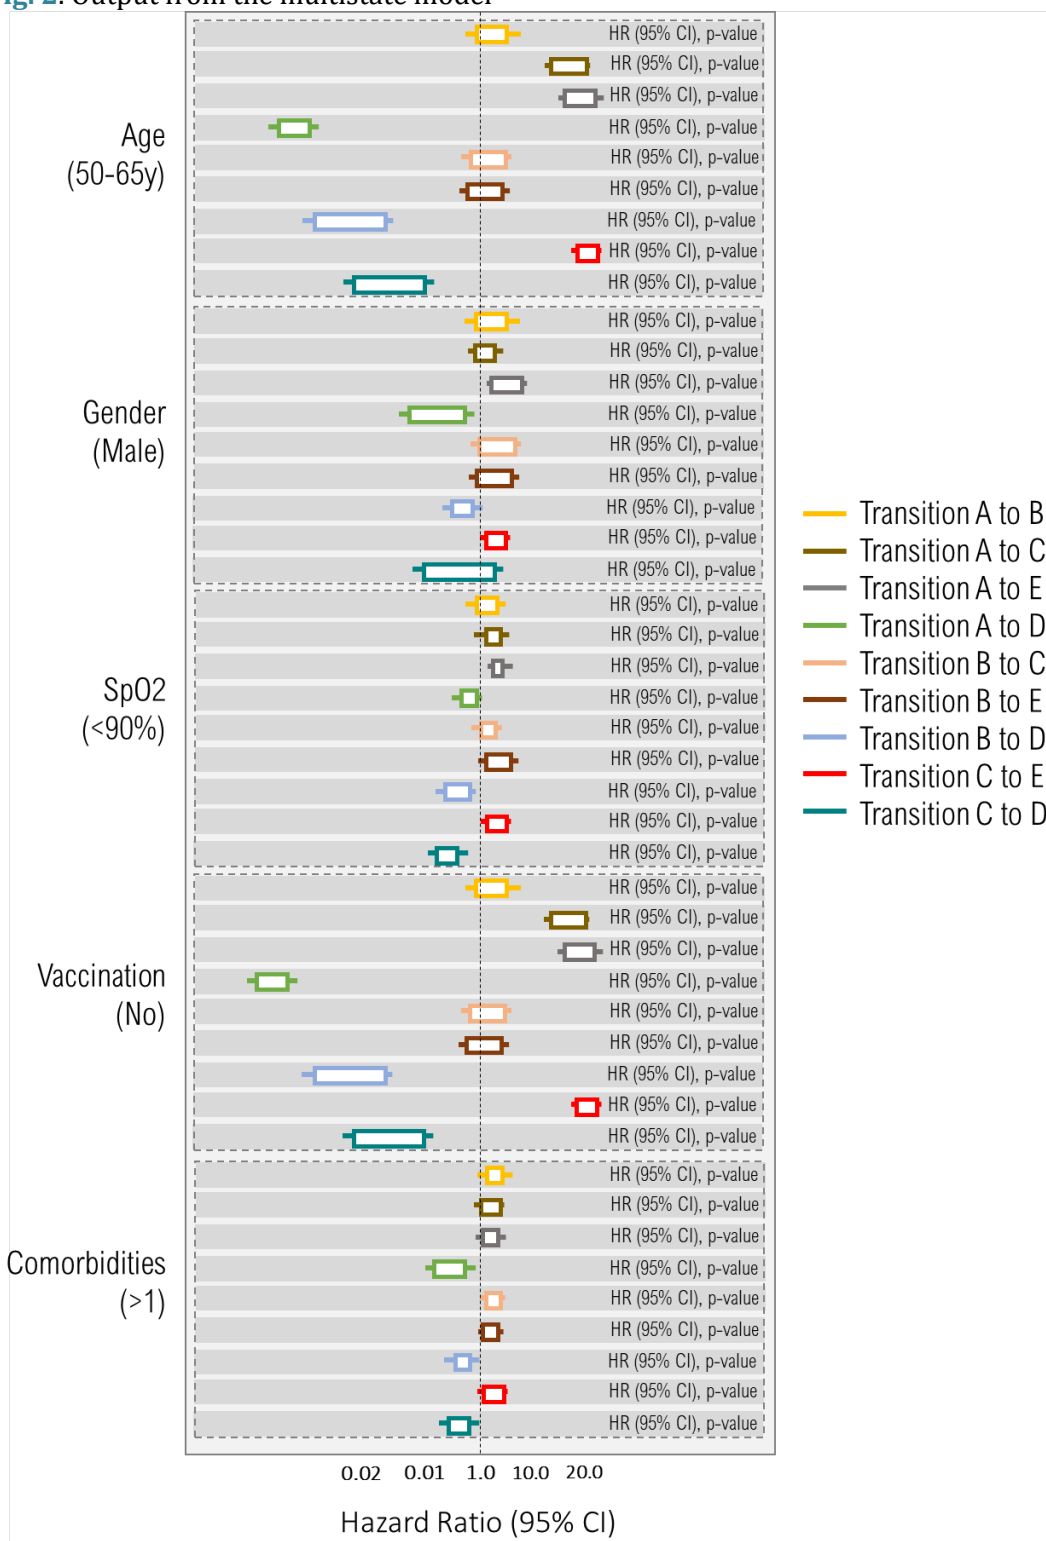

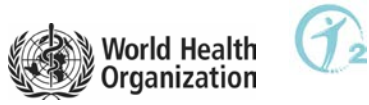

Fig. 3. Amount of oxygen according to oxygen modality, severity and region

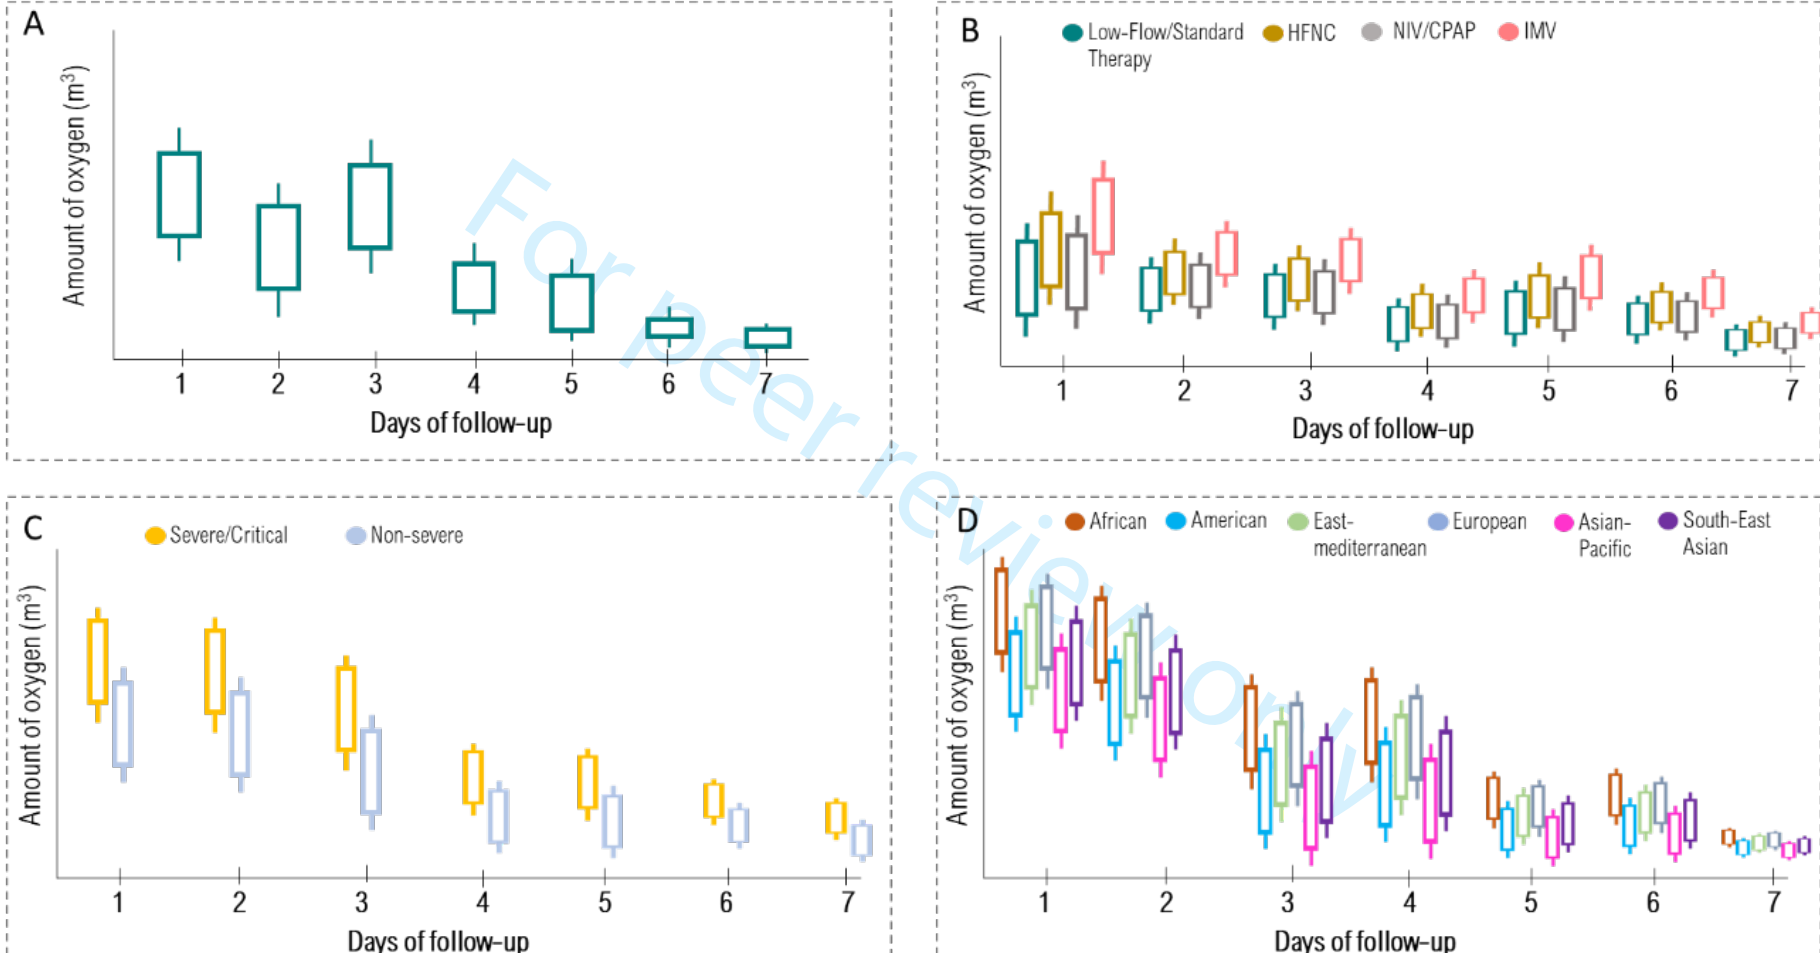

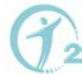**Table 1.** Characteristics at admission

| Variable                                                   | Overall N = |
|------------------------------------------------------------|-------------|
| <b>Age</b>                                                 |             |
| Years (median, IQR)                                        |             |
| 13–17 years                                                |             |
| 18–49 years                                                |             |
| 50–69 years                                                |             |
| ≥ 70 years                                                 |             |
| <b>Gender</b>                                              |             |
| Female (n, %)                                              |             |
| <b>Pregnancy status</b>                                    |             |
| Yes (n, %)                                                 |             |
| <b>Admission vital signs</b>                               |             |
| <b>Heart rate bt/min (median, IQR)</b>                     |             |
| > 100 bt/min (n, %)                                        |             |
| > 120 bt/min (n, %)                                        |             |
| <b>Respiratory rate b/min (median, IQR)</b>                |             |
| > 20 breaths/min (n, %) (adults)                           |             |
| > 40 breaths/min (n, %) (children)                         |             |
| <b>Blood pressure mmHg (median, IQR)</b>                   |             |
| > 140 mmHg (n, %) (adults)                                 |             |
| <b>Oxygen saturation (median, IQR)</b>                     |             |
| < 90% (n, %)                                               |             |
| < 94% (n, %)                                               |             |
| <b>Mental status</b>                                       |             |
| Alert (n, %)                                               |             |
| Verbal (n, %)                                              |             |
| Pain (n, %)                                                |             |
| Unresponsive scale (AVPU) (n, %)                           |             |
| <b>Height (cm)</b>                                         |             |
| <b>Weight (kg)</b>                                         |             |
| <b>Body mass index (BMI)</b>                               |             |
| < 18.5 (n, %)                                              |             |
| > 30 (n, %)                                                |             |
| > 40 (n, %)                                                |             |
| <b>Chronic conditions</b>                                  |             |
| None (n, %)                                                |             |
| Chronic cardiac disease (n, %)                             |             |
| Hypertension (n, %)                                        |             |
| Chronic obstructive pulmonary disease (n, %)               |             |
| Asthma (n, %)                                              |             |
| Chronic liver disease (n, %)                               |             |
| Dementia (n, %)                                            |             |
| Chronic neurological disease (n, %)                        |             |
| Human immunodeficiency virus (HIV) (n, %)                  |             |
| Not on ART (n, %)                                          |             |
| Diabetes (n, %)                                            |             |
| Current smoking (n, %)                                     |             |
| Tuberculosis (n, %)                                        |             |
| Asplenia (n, %)                                            |             |
| Cancer (n, %)                                              |             |
| <b>Pathogen testing at any time during hospitalization</b> |             |
| Variant Alpha (n, %)                                       |             |
| Variant Beta (n, %)                                        |             |
| Variant Gamma (n, %)                                       |             |
| Variant Delta (n, %)                                       |             |
| Variant Omicron (n, %)                                     |             |
| Other                                                      |             |
| Unknown (n, %)                                             |             |
| <b>Vaccination status</b>                                  |             |
| Vaccinated (n, %)                                          |             |



**Table 2.** Respiratory support at hospitalization

| Variable                                               | Overall N = |
|--------------------------------------------------------|-------------|
| <b>Respiratory and critical care interventions</b>     |             |
| <b>Prone position</b>                                  |             |
| Prone (n, %)                                           |             |
| Sitting (fowlers) (n, %)                               |             |
| Semi-fowlers (n, %)                                    |             |
| Lateral (n, %)                                         |             |
| Lying flat on back (n, %)                              |             |
| <b>Oxygen therapy</b>                                  |             |
| <b>Flow</b>                                            |             |
| 1–5 LPM (n, %)                                         |             |
| 6–10 LPM (n, %)                                        |             |
| 11–15 LPM (n, %)                                       |             |
| > 15 LPM (n, %)                                        |             |
| <b>Fraction of inspiring oxygen (%)</b>                |             |
| Median [IQR]                                           |             |
| <b>Peal airway pressure (cm)</b>                       |             |
| Median [IQR]                                           |             |
| <b>Positive end-expiratory pressure (cm)</b>           |             |
| Median [IQR]                                           |             |
| <b>Respiratory rate (breaths/min)</b>                  |             |
| Median [IQR]                                           |             |
| <b>Source of oxygen</b>                                |             |
| Cylinder (n, %)                                        |             |
| Concentrator (n, %)                                    |             |
| Piped/wall oxygen (n, %)                               |             |
| Other (n, %)                                           |             |
| <b>Oxygen therapy modality</b>                         |             |
| Room air (n, %)                                        |             |
| Nasal cannula (n, %)                                   |             |
| Simple face mask (n, %)                                |             |
| Venturi mask (n, %)                                    |             |
| Non-rebreather mask (n, %)                             |             |
| HFNC (n, %)                                            |             |
| CPAP (n, %)                                            |             |
| Bubble (n, %)                                          |             |
| Nasal pillows (n, %)                                   |             |
| Helmet (n, %)                                          |             |
| Full face mask (n, %)                                  |             |
| BiPAP (n, %)                                           |             |
| Full face mask (n, %)                                  |             |
| Nasal pillows (n, %)                                   |             |
| Helmet (n, %)                                          |             |
| Invasive mechanical ventilation (n, %)                 |             |
| Other (n, %)                                           |             |
| <b>Ventilator mode</b>                                 |             |
| Volume control (n, %)                                  |             |
| Pressure control (n, %)                                |             |
| Synchronized intermittent mandatory ventilation (n, %) |             |
| Pressure support (n, %)                                |             |
| Other (n, %)                                           |             |

**Table 3.** Outcomes at hospital discharge

| Variable                                             | Overall N = |
|------------------------------------------------------|-------------|
| Hospital outcomes                                    |             |
| Clinical status at discharge                         |             |
| Death (n, %)                                         |             |
| Alive – clinical improved (n, %)                     |             |
| Alive – not clinical improved (n, %)                 |             |
| Lost (n, %)                                          |             |
| Oxygen requirements on discharge                     |             |
| Yes (n, %)                                           |             |
| Source                                               |             |
| Cylinder (n, %)                                      |             |
| Concentrator (n, %)                                  |             |
| Other (n, %)                                         |             |
| Delivery devices                                     |             |
| Nasal cannula (n, %)                                 |             |
| Simple face mask (n, %)                              |             |
| Venturi mask (n, %)                                  |             |
| Non-breather mask (n, %)                             |             |
| CPAP/BiPAP (n, %)                                    |             |
| Other (n, %)                                         |             |
| Patients discharged with pulse oximeter (n, %)       |             |
| Time to event outcomes                               |             |
| Length of hospital stay                              |             |
| Days from hospital admission until transfer or death |             |
| Days of hospitalization of survivors                 |             |
| Days of hospitalization of non-survivors             |             |

**Table 4.** Oxygen supply at each facility

| Variable                                             | Overall<br>N = | African<br>Region N = | Region of<br>the<br>Americas N<br>= | South-East<br>Asia Region N<br>= | European Region N<br>= | Eastern<br>Mediterranean<br>Region N = | Western<br>Pacific<br>Region N = |
|------------------------------------------------------|----------------|-----------------------|-------------------------------------|----------------------------------|------------------------|----------------------------------------|----------------------------------|
| Total beds available                                 |                |                       |                                     |                                  |                        |                                        |                                  |
| Median (IQR)                                         |                |                       |                                     |                                  |                        |                                        |                                  |
| Total ICU beds available                             |                |                       |                                     |                                  |                        |                                        |                                  |
| Median (IQR)                                         |                |                       |                                     |                                  |                        |                                        |                                  |
| Staff dedicated for maintenance of medical equipment |                |                       |                                     |                                  |                        |                                        |                                  |
| Yes (n, %)                                           |                |                       |                                     |                                  |                        |                                        |                                  |
| Number of staff (n, %)                               |                |                       |                                     |                                  |                        |                                        |                                  |
| Total number of ventilators                          |                |                       |                                     |                                  |                        |                                        |                                  |
| Median (IQR)                                         |                |                       |                                     |                                  |                        |                                        |                                  |
| Total number of BiPAP                                |                |                       |                                     |                                  |                        |                                        |                                  |
| Median (IQR)                                         |                |                       |                                     |                                  |                        |                                        |                                  |
| Total number of CPAP                                 |                |                       |                                     |                                  |                        |                                        |                                  |
| Median (IQR)                                         |                |                       |                                     |                                  |                        |                                        |                                  |
| Total number of HFNC                                 |                |                       |                                     |                                  |                        |                                        |                                  |
| Median (IQR)                                         |                |                       |                                     |                                  |                        |                                        |                                  |
| Back-up generator                                    |                |                       |                                     |                                  |                        |                                        |                                  |
| Yes (n, %)                                           |                |                       |                                     |                                  |                        |                                        |                                  |
| Grid electricity collection                          |                |                       |                                     |                                  |                        |                                        |                                  |
| Yes (n, %)                                           |                |                       |                                     |                                  |                        |                                        |                                  |
| Piped network for medical gases                      |                |                       |                                     |                                  |                        |                                        |                                  |
| Yes (n, %)                                           |                |                       |                                     |                                  |                        |                                        |                                  |
| Bedside concentrators                                |                |                       |                                     |                                  |                        |                                        |                                  |
| Yes (n, %)                                           |                |                       |                                     |                                  |                        |                                        |                                  |
| Number median (IQR)                                  |                |                       |                                     |                                  |                        |                                        |                                  |
| Oxygen cylinders                                     |                |                       |                                     |                                  |                        |                                        |                                  |
| Yes (n, %)                                           |                |                       |                                     |                                  |                        |                                        |                                  |
| Quantity used monthly                                |                |                       |                                     |                                  |                        |                                        |                                  |
| Liquid oxygen capacity                               |                |                       |                                     |                                  |                        |                                        |                                  |
| Yes (n, %)                                           |                |                       |                                     |                                  |                        |                                        |                                  |
| Pressure swing adsorption plant                      |                |                       |                                     |                                  |                        |                                        |                                  |
| Yes (n, %)                                           |                |                       |                                     |                                  |                        |                                        |                                  |



## 5. Missing data

Records with missing admission dates will be excluded from the analysis. To avoid loss of information and statistical power in the association analysis, missing data will be imputed using a non-parametric random forest imputation algorithm implemented in the missForest R package (3). To prevent too many assumptions, only variables with less than 10% of missing information will be considered for imputation. To get a better understanding of the way missing data distribute among variables in the study, correlation matrixes, patching patterns, and box plot analyses will be performed by means of several functions implemented in MICE and VIM R packages. By checking the missing pattern distribution, missing data would be considered either non-completely at random, missing not at random, or missing at random. Sensitivity analyses on complete cases will be performed.

## 6. Sample size

The sample sizes to assess associations between each transition and patient's characteristics at the time of hospital admission were calculated.

Because there exists no published method to perform power analysis for multistate models, a priori power analysis was calculated for separate logistic regressions (LR) corresponding to each of the transitions of interest presented in Fig. 1. For each of these LRs, the event of interest was the probability for a patient to go through the transition during their hospitalization. Basal transition rates between states were hypothesized by the Study Steering Committee WHO panel of experts in the reference population, and are summarized in Fig. 4. Basal event rates ( $Pr Y=1$ ) were derived from these transition rates as summarized in Table 5. Seven covariates were considered (age, gender, vaccination, SpO<sub>2</sub>, having at least one comorbidity, having more than one comorbidity, and the percentage ICU beds in the facility). A priori distributions for these covariates were estimated using the WHO Global Clinical Platform, as summarized in Table 6. The sample size was estimated to achieve in a two-sided z-test with a  $\alpha=0.01$  to account for the multiple testing incurred, and a power of at least 0.9. The squared multiple correlations for covariates were estimated in a moderate  $R^2=0.2$  using the procedure of Demidenko with variance correction (4). G\*Power 3.1 Software was used for the estimations (5). No literature was found to estimate odds ratios (ORs) for the percentage ICU beds indicator so sample size was computed for a conservative OR = 2 for each of the transitions.



1  
2  
3  
4 **Table 6** displays the sample size required to estimate the effect of each of age, gender,  
5 vaccination, SpO<sub>2</sub>, presence of comorbidities and percentage ICU beds on each transition under  
6 these assumptions. A chart provided in **Fig. 5** shows the achieved power for a given sample size.  
7

8  
9 **Table 7** displays the sample size required to estimate the effect of each of the facility level  
10 characteristics in the facility level model: electricity availability, number of biomedical experts and  
11 number of health care workers who provide direct patient care and can manage patients with  
12 respiratory failure on the time to death under these assumptions. A chart provided in **Fig. 6** shows  
13 the achieved power for a given sample size for this last model. G\*Power input parameters are  
14 available upon request. The proposed multivariable analysis sample size is **N = 1378**.  
15  
16  
17  
18  
19  
20  
21  
22  
23  
24  
25  
26  
27  
28  
29  
30  
31  
32  
33  
34  
35  
36  
37  
38  
39  
40  
41  
42  
43  
44  
45  
46  
47  
48  
49  
50  
51  
52  
53  
54  
55  
56  
57  
58  
59  
60

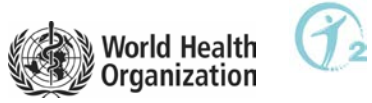

Fig. 4. The estimated rate of transitions

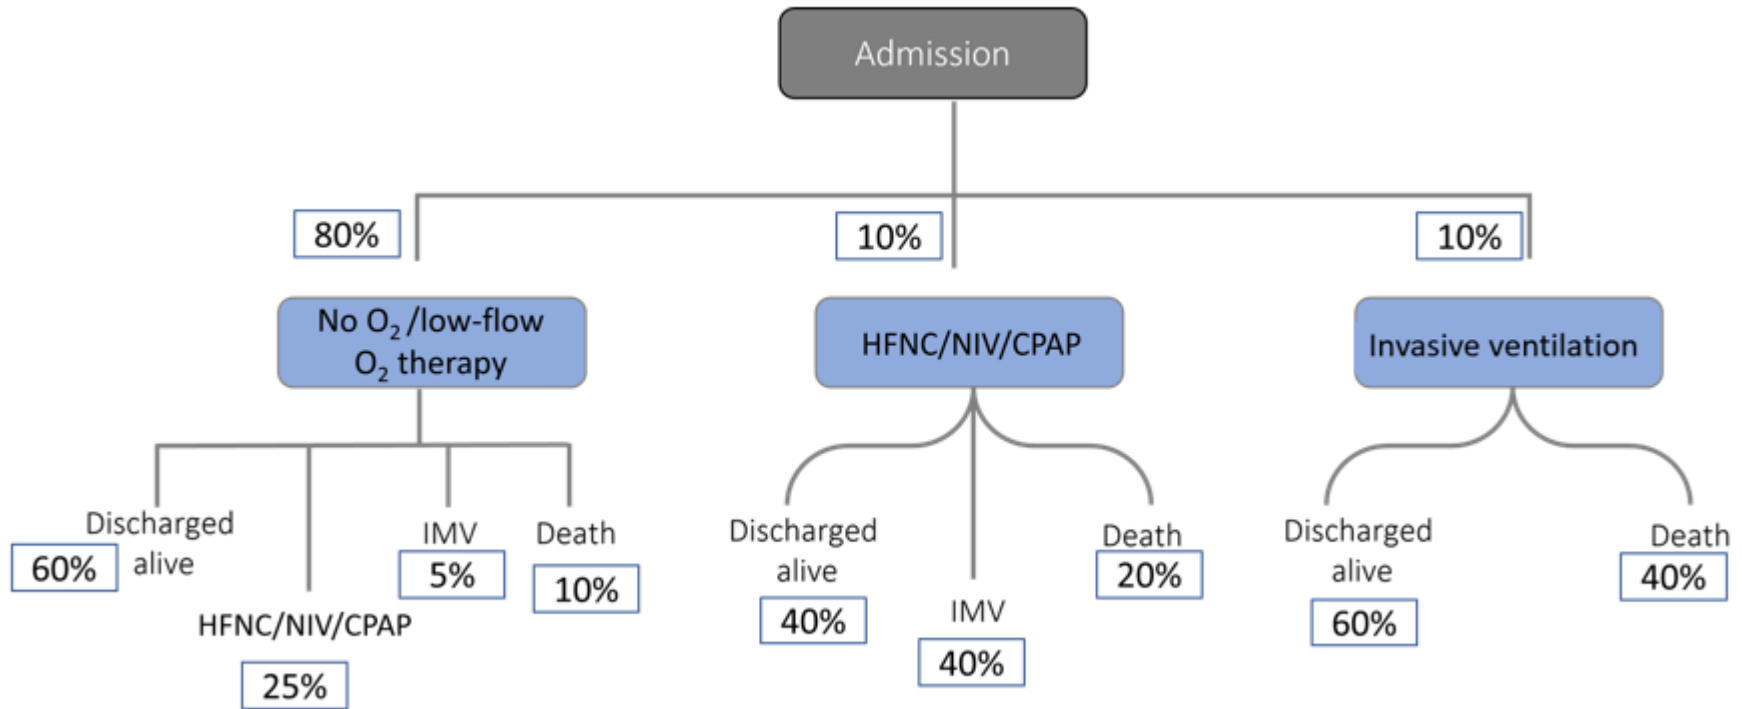

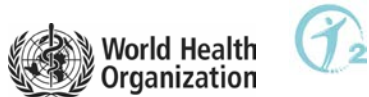

**Table 5.** Computation of basal event rates based on transition rates described in Fig. 4; the total proportion of admitted patients that will pass through the transition from state A to state B

| Transition number in Fig. 1 | State A                                            | State B                  | Among admitted patients, percent to go through state A <sup>a</sup> | Among patients in state A, percent to transition to state B <sup>b</sup> | Basal event rate <sup>c</sup> |
|-----------------------------|----------------------------------------------------|--------------------------|---------------------------------------------------------------------|--------------------------------------------------------------------------|-------------------------------|
| 1                           | No O <sub>2</sub> /standard O <sub>2</sub> therapy | Non-invasive ventilation | 80%                                                                 | 25%                                                                      | <b>20.0%</b>                  |
| 2                           | No O <sub>2</sub> /standard O <sub>2</sub> therapy | Death                    | 80%                                                                 | 10%                                                                      | <b>8.0%</b>                   |
| 3                           | No O <sub>2</sub> /standard O <sub>2</sub> therapy | Invasive ventilation     | 80%                                                                 | 5%                                                                       | <b>4.0%</b>                   |
| 5                           | Non-invasive ventilation                           | Invasive ventilation     | 30%                                                                 | 40%                                                                      | <b>12.0%</b>                  |
| 7                           | Non-invasive ventilation                           | Death                    | 30%                                                                 | 20%                                                                      | <b>6.0%</b>                   |
| 9                           | Invasive ventilation                               | Death                    | 26%                                                                 | 40%                                                                      | <b>10.4%</b>                  |

<sup>a</sup> Sum of patients to go through a given state, irrespective of their trajectory.

<sup>b</sup> See Fig. 4.

<sup>c</sup> Among all admitted patients, proportion to go through transition A → B = p(A) \* p(B).

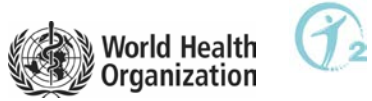

**Table 6.** A priori distribution parameters for covariates to be included in the model, necessary for sample size computation

| Covariate              | Estimated distribution in study population <sup>a</sup> |
|------------------------|---------------------------------------------------------|
| 50–65 year olds        | 28%                                                     |
| Male                   | 47%                                                     |
| Vaccinated             | 21%                                                     |
| SP0 <sub>2</sub> < 90% | 22%                                                     |
| 1 comorbidity          | 28%                                                     |
| > 1 comorbidity        | 24%                                                     |

<sup>a</sup> Estimation derived from the WHO Global Clinical Platform.







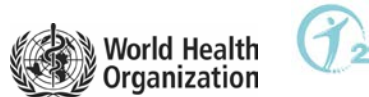

|                                                       |                        |                                                  |                                                                                                                                                                                                                                                                                                                                                             |         |
|-------------------------------------------------------|------------------------|--------------------------------------------------|-------------------------------------------------------------------------------------------------------------------------------------------------------------------------------------------------------------------------------------------------------------------------------------------------------------------------------------------------------------|---------|
| % ICU beds                                            | <i>continuous</i>      | <i>+/- 1 SD</i><br><b>OR = 2</b>                 | No literature                                                                                                                                                                                                                                                                                                                                               | N = 367 |
| Probability of transition from HFNC/NIV/CPAP to death |                        |                                                  |                                                                                                                                                                                                                                                                                                                                                             |         |
| Age                                                   | <i>18-29 years old</i> | <i>50-65 years old</i><br><b>35 times higher</b> | <a href="#">CDC, July 19 2021 (8)</a>                                                                                                                                                                                                                                                                                                                       | N = 55  |
| Gender                                                | <i>Male</i>            | <b>3 times higher</b>                            | <a href="https://www.ncbi.nlm.nih.gov/pmc/articles/PMC8270145/">https://www.ncbi.nlm.nih.gov/pmc/articles/PMC8270145/</a>                                                                                                                                                                                                                                   | N = 726 |
| Vaccination                                           | <i>No</i>              | <b>14 times higher</b>                           | <a href="https://covid.cdc.gov/covid-data-tracker/?CDC_AA_refVal=https%3A%2F%2Fwww.cdc.gov%2Fcoronavirus%2F2019-ncov%2Fcases-updates%2Fcases-in-us.html#rates-by-vaccine-status">https://covid.cdc.gov/covid-data-tracker/?CDC_AA_refVal=https%3A%2F%2Fwww.cdc.gov%2Fcoronavirus%2F2019-ncov%2Fcases-updates%2Fcases-in-us.html#rates-by-vaccine-status</a> | N = 116 |
| SpO <sub>2</sub>                                      | <i>&gt; 90%</i>        | <i>&lt; 89%</i><br><b>4 times higher</b>         | <a href="#">Mejía F et al., 2021 (9)</a>                                                                                                                                                                                                                                                                                                                    | N = 542 |
| Comorbidity (1)                                       | <i>No</i>              | <i>Yes</i><br><b>3 times higher</b>              | Zhou Y et al., 2020 (10)                                                                                                                                                                                                                                                                                                                                    | N = 833 |
| Comorbidity (> 1)                                     | <i>No</i>              | <i>Yes</i><br><b>3 times higher</b>              | Zhou Y et al., 2020 (10)                                                                                                                                                                                                                                                                                                                                    | N = 907 |
| % ICU beds                                            | <i>Continuous</i>      | <i>+/- 1 SD</i><br><b>OR = 2</b>                 | No literature                                                                                                                                                                                                                                                                                                                                               | N = 624 |
| Probability of transition from IMV to death           |                        |                                                  |                                                                                                                                                                                                                                                                                                                                                             |         |
| Age                                                   | <i>18-29 years old</i> | <i>50-65 years old</i><br><b>35 times higher</b> | <a href="#">CDC, July 19 2021 (8)</a>                                                                                                                                                                                                                                                                                                                       | N = 49  |
| Gender                                                | <i>Male</i>            | <b>3 times higher</b>                            | <a href="https://www.ncbi.nlm.nih.gov/pmc/articles/PMC8270145/">https://www.ncbi.nlm.nih.gov/pmc/articles/PMC8270145/</a>                                                                                                                                                                                                                                   | N = 467 |
| Vaccination                                           | <i>No</i>              | <b>14 times higher</b>                           | <a href="https://covid.cdc.gov/covid-data-tracker/?CDC_AA_refVal=https%3A%2F%2Fwww.cdc.gov%2Fcoronavirus%2F2019-ncov%2Fcases-updates%2Fcases-in-us.html#rates-by-vaccine-status">https://covid.cdc.gov/covid-data-tracker/?CDC_AA_refVal=https%3A%2F%2Fwww.cdc.gov%2Fcoronavirus%2F2019-ncov%2Fcases-updates%2Fcases-in-us.html#rates-by-vaccine-status</a> | N = 92  |
| SpO <sub>2</sub>                                      | <i>&gt; 90%</i>        | <i>&lt; 89%</i><br><b>4 times higher</b>         | <a href="#">Mejía F et al., 2021 (9)</a>                                                                                                                                                                                                                                                                                                                    | N = 365 |
| Comorbidity (1)                                       | <i>No</i>              | <i>Yes</i><br><b>3 times higher</b>              | Zhou Y et al., 2020 (10)                                                                                                                                                                                                                                                                                                                                    | N = 543 |
| Comorbidity (> 1)                                     | <i>No</i>              | <i>Yes</i><br><b>3 times higher</b>              | Zhou Y et al., 2020 (10)                                                                                                                                                                                                                                                                                                                                    | N = 593 |
| % ICU beds                                            | <i>Continuous</i>      | <i>+/- 1 SD</i><br><b>OR = 2</b>                 | No literature                                                                                                                                                                                                                                                                                                                                               | N = 407 |



Fig. 5. Achieved power vs sample size for the multistate model

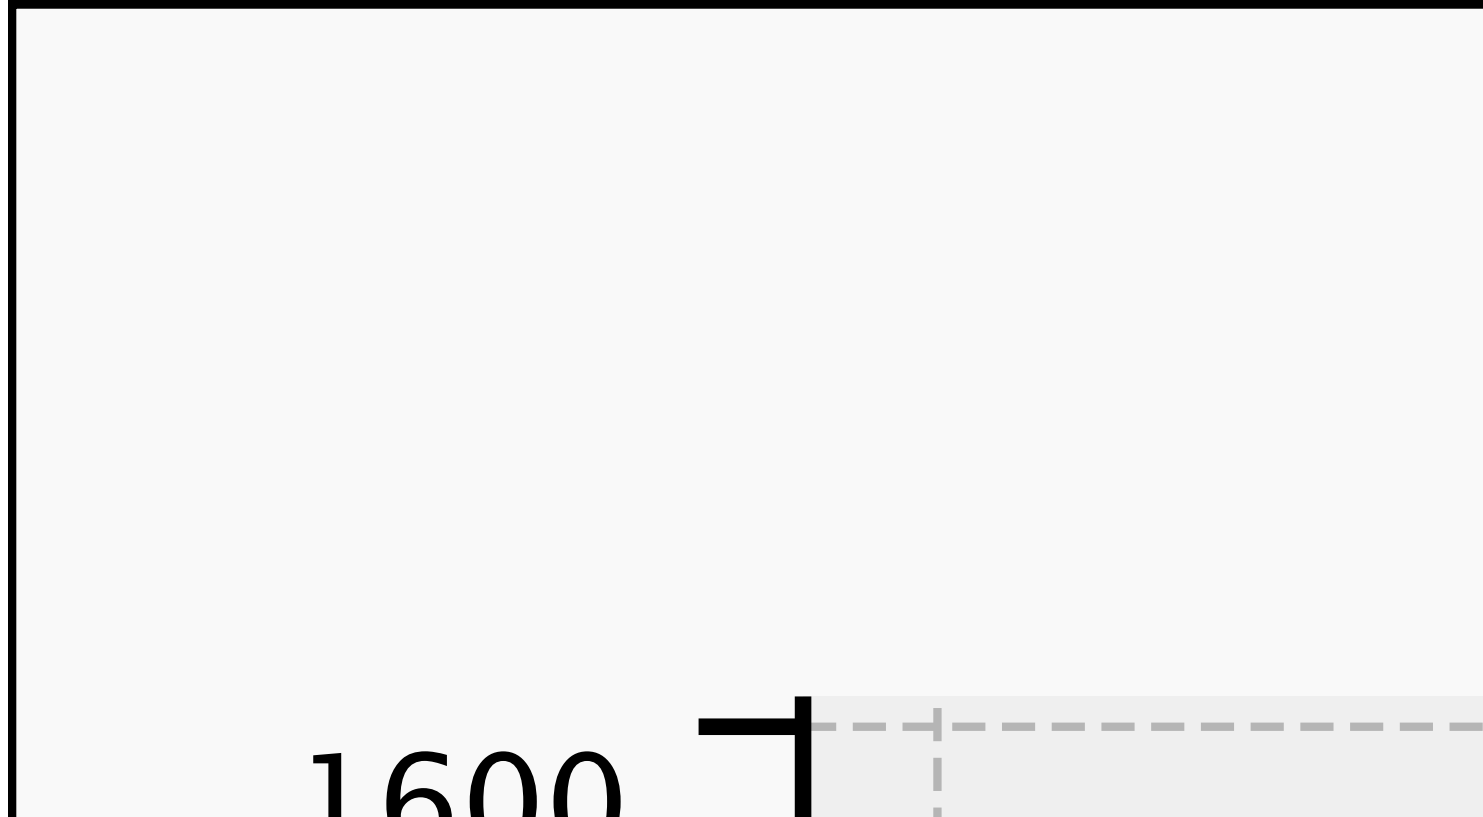

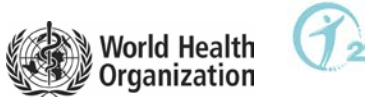

Table 8. Sample size estimation for each covariate in the multivariable analysis to assess the association with death

|                                                       | Probability of death   |                                | Reference                       | Sample size |
|-------------------------------------------------------|------------------------|--------------------------------|---------------------------------|-------------|
|                                                       | Reference              | Interest                       |                                 |             |
| Electricity                                           | No<br>5% event rate    | Yes<br><b>5 times higher</b>   |                                 | N = 634     |
| Biomedical staff                                      | > 90%<br>5% event rate | < 89%<br><b>4 times higher</b> | <u>Mejía F et al., 2020 (9)</u> | N = 852     |
| Any clinical staff who can manage respiratory failure | No<br>5% event rate    | Yes<br><b>3 times higher</b>   | Zhou Y et al., 2020 (10)        | N = 1378    |

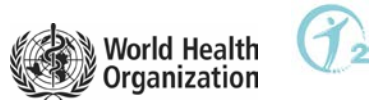

Fig. 6. Achieved power vs sample size for the facility level model

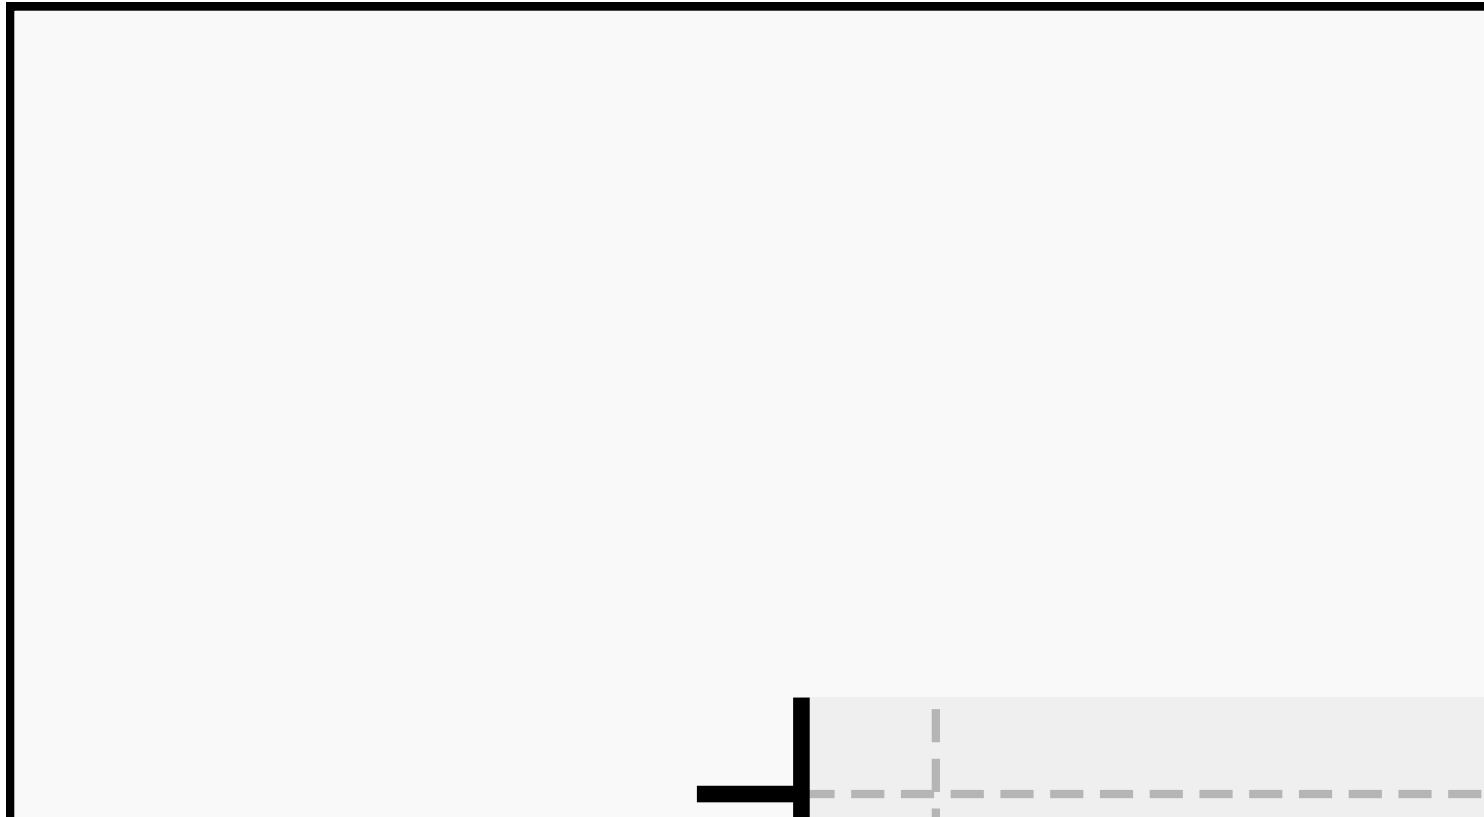

## 7. Statistical software

All analyses will be conducted in R (*R: a language and environment for statistical computing*. R Core Team, R Foundation for Statistical Computing, Vienna, Austria; 2020 (<https://www.R-project.org>) (7).

## References

1. Subirana I, Vila J, Sanz H, Gavin L, Penafiel J, Gimenez D. Package compareGroups [Internet]. 2018 (<https://cran.r-project.org/web/packages/compareGroups/index.html>, accessed 14 November 2022).
2. de Wreede LC, Fiocco M, Putter H. mstate: an {R} package for the analysis of competing risks and multi-state models. *J Stat Softw*. 2011;38(7):1–30 (<https://www.jstatsoft.org/v38/i07/>, accessed 14 November 2022).
3. Stekhoven DJ, Bühlmann P. MissForest - nonparametric missing value imputation for mixed-type data. 2011 (<http://arxiv.org/abs/1105.0828>, accessed 14 November 2022).
4. Demidenko E. Sample size determination for logistic regression revisited. *Stat Med*. 2006;26(18):3385–97 (<https://onlinelibrary.wiley.com/doi/10.1002/sim.2771>, accessed 14 November 2022).
5. Erdfelder E, Faul F, Buchner A. GPOWER: A general power analysis program. *Behav Res Methods, Instruments, Comput*. 1996;28(1):1–11 (<http://link.springer.com/10.3758/BF03203630>, accessed 14 November 2022).
6. Wickham H, Navarro D, Pedersen TL. *Ggplot2: elegant graphics for data analysis*. Springer; 2016. [not cited?]
7. R: A language and environment for statistical computing. R Development Core Team. Vienna, Austria; 2008. ISBN 3-900051-07-0. [cited out of sequence]
8. Risk for COVID-19 infection, hospitalization, and death by age group. Atlanta, GA: Centres for Disease Control and Prevention; 2021 (<https://www.cdc.gov/coronavirus/2019-ncov/covid-data/investigations-discovery/hospitalization-death-by-age.html>, accessed 14 November 2022).
9. Mejía F, Medina C, Cornejo E, Morello E, Vásquez S, Alave J et al. Oxygen saturation as a predictor of mortality in hospitalized adult patients with COVID-19 in a public hospital in Lima, Peru. *PLoS One*. 2020;15(12):e0244171 (<https://dx.plos.org/10.1371/journal.pone.0244171>, accessed 14 November 2022).
10. Zhou Y, Yang Q, Chi J, Dong B, Lv W, Shen L et al. Comorbidities and the risk of severe or fatal outcomes associated with coronavirus disease 2019: a systematic review and meta-analysis. *Int J Infect Dis*. 2020;99:47–56 (<https://www.ncbi.nlm.nih.gov/pmc/articles/PMC7381888/>, accessed 14 November 2022).

## Annex 5. Data sharing agreement

### DATA-SHARING AGREEMENT

#### Schedule of particulars

This Data-Sharing Agreement is comprised of: (i) this Schedule of Particulars; (ii) Annex I – General Conditions; and (iii) Annex II – Project Description (together, the “**Agreement**”).

Pursuant to the terms of this Agreement, the Contributor hereby agrees to provide, and WHO hereby agrees to accept, the Data for the Purpose of Use and subject to the Restrictions on Use.

In this Agreement, the following expressions have the following meanings:

1. The "**Contributor**": [full legal name of your institution];
2. "**WHO**": the World Health Organization, 20 Avenue Appia, CH-1211 Geneva 27, Switzerland;
3. The "**Data**": Any data, results and reports, unpublished or otherwise, collected during or resulting from the Project which are owned by the Contributor and provided by the Contributor to WHO during the term of this Agreement;
4. The "**Parties**": the Contributor and WHO;
5. The "**Project**" as further described in Annex II;
6. The "**Purpose of Use**": The Data are provided to WHO for WHO to implement the Project which is summarized in Annex II and for use in related materials and activities, including but not limited to WHO's internal research purposes;
7. The "**Restrictions on Use**": The Data shall not be used for any purpose other than the Purpose of Use;
8. The "**Term of Agreement**": [Unrestricted in time]; and
9. "**Data Charges**": The Data will be provided free of charge.

Acknowledged and agreed:

Signed for and on behalf of WHO

Signed for and on behalf of the Contributor

Name: Janet Diaz

Name:

Title: Lead, Clinical Management for COVID-19

Title:

Date:

Date:



## DATA-SHARING AGREEMENT

### Annex I – General Conditions

#### 1. Use

- 1.1. The Data are supplied by the Contributor to WHO solely for the Purpose of Use and subject to the Restrictions on Use.
- 1.2. Other than for and within the Purpose of Use, the Data shall not be transferred, sold, offered for sale or otherwise used, without the prior written agreement of the Contributor.
- 1.3. WHO shall only allow parties who have a need to know for the Purpose of Use and who are bound by similar obligations of confidentiality and restrictions on use as contained in this Agreement to have access to the Data.
- 1.4. In implementing the Purpose of Use, WHO will: not attempt to identify or contact research participants included in the Data; Respect the confidentiality of the Data; and maintain the Data in a secure location on a password-protected, WHO-internal network protected by standard encoding and the WHO firewall for the duration of the Purpose of Use.

#### 2. Confidentiality

- 2.1. The Data may incorporate confidential information of the Contributor. Accordingly, if and to the extent any such Data are clearly marked by the Contributor as “confidential”, WHO shall during the term of this Agreement and for a period of five years following its termination, treat such Data confidential and only disclose them under like obligations of confidentiality and restrictions on use as those contained herein. WHO shall be deemed to have fulfilled its obligations, if it exercises at least the same degree of care in maintaining confidentiality as it would in protecting its own confidential information.
- 2.2. However, the above mentioned obligations of confidentiality shall not apply to Data which:
  - (i) can be shown to have been known to WHO at the time of its acquisition from the Contributor;
  - (ii) are acquired from a third party, not in breach of any obligation of confidentiality to the Contributor;
  - (iii) are independently devised or arrived at by, on behalf of, or for WHO without access to the Information; or
  - (iv) enter the public domain otherwise than by breach of the undertakings set out in this Agreement.

#### 3. Rights

- 3.1. Except for the rights explicitly granted to WHO hereunder, nothing contained in this Agreement shall be construed as conveying any rights under any patents or other intellectual property which either party may have or may hereafter obtain.
- 3.2. Nothing contained in this Agreement shall restrict the Contributor's right to sell, transfer, assign or distribute the Data to any other person for commercial or non-commercial purposes.

#### 4. Publications

- 4.1. Subject to the Contributor's proprietary rights, the results obtained through use of the Data within the Purpose of Use may be published by WHO and/or parties collaborating with WHO. In order to avoid prejudice to the Contributor's proprietary rights, WHO shall transmit any material intended to be published or relevant portions thereof, to the Contributor under confidential cover for review at least ten days prior to its submission to any editor, publisher, referee or meeting organizer. In absence of any objection by

1  
2  
3 the Contributor within that thirty-day period concerning prejudice to its proprietary  
4 rights, the publication may proceed, provided, however, that the Contributor shall be  
5 duly acknowledged in such publication.

- 6  
7 4.2. WHO will prepare manuscript(s) of the results of the Purpose of Use for publication,  
8 pursuant to the terms of the applicable protocol, and publish such manuscripts  
9 pursuant to WHO's rules and regulations, including its policy on open access, as  
10 contained at: <http://www.who.int/about/policy/en/>. WHO may further use the results  
11 of the Purpose of Use to update relevant WHO recommendations and develop any  
12 guidelines, including publication thereof, and may further publish those results.
- 13 4.3. If a manuscript of the Research Activities is submitted for publication, WHO will in all  
14 events retain the Data until the peer review process is completed, and then for one  
15 year after publication to ensure sufficient time to address any required responses to the  
16 findings (e.g., letters to the editor).
- 17 4.4. WHO will ensure that all publications relating to the Data will appropriately  
18 acknowledge WHO, the Contributor, and all other entities contributing data to the  
19 publication.
- 20  
21

## 22 **5. Undertakings of the Contributor**

- 23 5.1. The Contributor represents and warrants that: It has obtained all rights and permissions  
24 necessary to transfer the Data to WHO and for WHO to implement the Purpose of Use  
25 and all other activities relating to the Data as described herein; The Data have been  
26 collected from clinical trials, observational studies, or surveillance systems that have  
27 been conducted in accordance with all applicable laws.
- 28 5.2. Prior to transmitting the Data to WHO, the Contributor will: Verify whether approval  
29 from their local/relevant Ethics Review Committee is required for the use of the Data  
30 for the Purpose of Use, and if that approval is required, obtain it; and Anonymize all  
31 participant-level data in the Data, pursuant to agreed standards, to remove all  
32 information in the Data that could be used to identify research participants.
- 33 5.3. The Contributor will transmit the Data to WHO securely, using secure file transfer  
34 protocol.
- 35 5.4. The Contributor will avoid providing to WHO any information relating to the Data or the  
36 Research Activities that relates to a natural person, which, either directly or indirectly,  
37 in combination with other information available or likely to be available to WHO, can  
38 identify such natural person.
- 39 5.5. The Contributor makes no warranty of the fitness of the Data for any particular purpose  
40 or any other warranty, either express or implied. However, to the best of the  
41 Contributor's knowledge, the use of the Data within the Purpose of Use shall not infringe  
42 on the proprietary rights of any third party.
- 43 5.6. WHO agrees that (except as may explicitly be provided in this Agreement) the  
44 Contributor has no control over the use that is made of the Data by WHO or parties  
45 collaborating with WHO in accordance with the terms of this Agreement. Consequently,  
46 WHO agrees that the Contributor shall not be liable for such use.
- 47  
48  
49  
50

## 51 **6. Other Matters**

- 52 6.1. Nothing in this Agreement shall be interpreted as establishing a partnership between  
53 the parties or establishing one party as the agent of the other or conferring a right on  
54 one party to bind the other, except as may be specifically set out herein.
- 55 6.2. Without the prior written approval of the other Party, neither Party shall, in any  
56 statement or material of an advertising or promotional nature, refer to this Agreement  
57 or the relationship between the Parties, or use the name (or any abbreviation thereof)  
58 and/or emblem of the other Party.
- 59  
60

- 1  
2  
3 6.3. Any dispute relating to the interpretation or application of this Agreement shall,  
4 unless amicably settled, be subject to conciliation. In the event of failure of the latter,  
5 the dispute shall be settled by arbitration. The arbitration shall be conducted in  
6 accordance with the modalities to be agreed upon by the parties or, in the absence of  
7 agreement, with the rules of arbitration of the International Chamber of Commerce. The  
8 Parties shall accept the arbitral award as final.  
9  
10 6.4. Nothing contained herein shall be construed as a waiver of any of the privileges and  
11 immunities enjoyed by WHO under national or international law and/or as submitting  
12 WHO to any national court or jurisdiction.  
13  
14 6.5. This Agreement sets forth the entire understanding between the parties and supersedes  
15 any prior agreements, written or verbal related to the Data. It shall only be capable of  
16 change by written amendment executed by duly authorized officers of the Parties.  
17  
18  
19  
20  
21  
22  
23  
24  
25  
26  
27  
28  
29  
30  
31  
32  
33  
34  
35  
36  
37  
38  
39  
40  
41  
42  
43  
44  
45  
46  
47  
48  
49  
50  
51  
52  
53  
54  
55  
56  
57  
58  
59  
60

For peer review only

1  
2  
3  
4  
5  
6  
7  
8  
9  
10

**DATA-SHARING  
AGREEMENT**  
**Annex II – Project  
Description**

11  
12  
13  
14

**Oxygen requirements and approaches to respiratory support in patients with COVID-19 in low- and middle-income countries: an observational study.**

15  
16  
17  
18  
19  
20

**Background:** The COVID-19 pandemic has highlighted, more than ever, the acute need for scale up of oxygen therapy. WHO has provided an inventory tool to quantify facility-level provision of infrastructure to deliver oxygen therapy. However, data on the use of oxygen therapy at the patient-level remains lacking.

21  
22

**Population studied:** Suspected or confirmed COVID-19 patients receiving oxygen therapy.

23  
24  
25  
26  
27  
28

**Study design:** We propose to conduct an observational study of patients with suspected or confirmed COVID-19 receiving oxygen therapy. Basic information and risk factor information will be collected from participants. Participants will be followed for 7 days or until outcome (hospital discharge or death).

29  
30  
31  
32  
33

**Outcomes and analyses:** Determination of the person-time on specific respiratory modalities (nasal cannula, face mask, Venturi, NRB, HFNC, CPAP, BiPAP, invasive mechanical ventilation); Proportion of patients on each respiratory modality; Facility oxygen supply metrics; Outcome of patient as measured by WHO clinical progression scale, censored at 30 days.

34  
35  
36  
37  
38  
39  
40  
41  
42  
43  
44  
45  
46  
47  
48  
49  
50  
51  
52  
53  
54  
55  
56  
57  
58  
59  
60

Please refer to the specific protocol and relevant documents (questionnaire, health care facility questionnaire). For questions contact: [covidrespstudy@who.int](mailto:covidrespstudy@who.int)

# Reporting checklist for cohort study.

Based on the STROBE cohort guidelines.

## Instructions to authors

Complete this checklist by entering the page numbers from your manuscript where readers will find each of the items listed below.

Your article may not currently address all the items on the checklist. Please modify your text to include the missing information. If you are certain that an item does not apply, please write "n/a" and provide a short explanation.

Upload your completed checklist as an extra file when you submit to a journal.

In your methods section, say that you used the STROBE cohort reporting guidelines, and cite them as:

von Elm E, Altman DG, Egger M, Pocock SJ, Gøtzsche PC, Vandenbroucke JP. The Strengthening the Reporting of Observational Studies in Epidemiology (STROBE) Statement: guidelines for reporting observational studies.

|                           | Reporting Item                                                                                                      | Page Number |
|---------------------------|---------------------------------------------------------------------------------------------------------------------|-------------|
| <b>Title and abstract</b> |                                                                                                                     |             |
| Title                     | <a href="#">#1a</a> Indicate the study's design with a commonly used term in the title or the abstract              | 1           |
| Abstract                  | <a href="#">#1b</a> Provide in the abstract an informative and balanced summary of what was done and what was found | 1           |

1 **Introduction**

2

3

4 Background / [#2](#) Explain the scientific background and rationale for the 3

5

6 rationale

7 investigation being reported

8

9

10 Objectives [#3](#) State specific objectives, including any prespecified 3

11

12 hypotheses

13

14

15 **Methods**

16

17

18 Study design [#4](#) Present key elements of study design early in the paper 4-5

19

20

21 Setting [#5](#) Describe the setting, locations, and relevant dates, 5-6

22

23 including periods of recruitment, exposure, follow-up,

24 and data collection

25

26

27

28

29 Eligibility criteria [#6a](#) Give the eligibility criteria, and the sources and methods 5

30

31 of selection of participants. Describe methods of follow-

32 up.

33

34

35

36 Eligibility criteria [#6b](#) For matched studies, give matching criteria and number n/a

37

38 of exposed and unexposed

39

40

41

42 Variables [#7](#) Clearly define all outcomes, exposures, predictors, 7

43

44 potential confounders, and effect modifiers. Give

45 diagnostic criteria, if applicable

46

47

48

49 Data sources / [#8](#) For each variable of interest give sources of data and 7

50

51 measurement

52 details of methods of assessment (measurement).

53

54 Describe comparability of assessment methods if there

55

56 is more than one group. Give information separately for

57

58

59

60

for exposed and unexposed groups if applicable.

|    |                        |                      |                                                                                                                                                                                                                                 |
|----|------------------------|----------------------|---------------------------------------------------------------------------------------------------------------------------------------------------------------------------------------------------------------------------------|
| 1  |                        |                      |                                                                                                                                                                                                                                 |
| 2  |                        |                      |                                                                                                                                                                                                                                 |
| 3  |                        |                      |                                                                                                                                                                                                                                 |
| 4  | Bias                   | <a href="#">#9</a>   | Describe any efforts to address potential sources of bias                                                                                                                                                                       |
| 5  |                        |                      |                                                                                                                                                                                                                                 |
| 6  |                        |                      |                                                                                                                                                                                                                                 |
| 7  |                        |                      |                                                                                                                                                                                                                                 |
| 8  |                        |                      |                                                                                                                                                                                                                                 |
| 9  | Study size             | <a href="#">#10</a>  | Explain how the study size was arrived at                                                                                                                                                                                       |
| 10 |                        |                      |                                                                                                                                                                                                                                 |
| 11 |                        |                      |                                                                                                                                                                                                                                 |
| 12 | Quantitative variables | <a href="#">#11</a>  | Explain how quantitative variables were handled in the analyses. If applicable, describe which groupings were chosen, and why                                                                                                   |
| 13 |                        |                      |                                                                                                                                                                                                                                 |
| 14 |                        |                      |                                                                                                                                                                                                                                 |
| 15 |                        |                      |                                                                                                                                                                                                                                 |
| 16 |                        |                      |                                                                                                                                                                                                                                 |
| 17 |                        |                      |                                                                                                                                                                                                                                 |
| 18 |                        |                      |                                                                                                                                                                                                                                 |
| 19 | Statistical methods    | <a href="#">#12a</a> | Describe all statistical methods, including those used to control for confounding                                                                                                                                               |
| 20 |                        |                      |                                                                                                                                                                                                                                 |
| 21 |                        |                      |                                                                                                                                                                                                                                 |
| 22 |                        |                      |                                                                                                                                                                                                                                 |
| 23 |                        |                      |                                                                                                                                                                                                                                 |
| 24 |                        |                      |                                                                                                                                                                                                                                 |
| 25 | 6-7                    |                      |                                                                                                                                                                                                                                 |
| 26 |                        |                      |                                                                                                                                                                                                                                 |
| 27 |                        |                      |                                                                                                                                                                                                                                 |
| 28 | Statistical methods    | <a href="#">#12b</a> | Describe any methods used to examine subgroups and interactions                                                                                                                                                                 |
| 29 |                        |                      |                                                                                                                                                                                                                                 |
| 30 |                        |                      |                                                                                                                                                                                                                                 |
| 31 |                        |                      |                                                                                                                                                                                                                                 |
| 32 |                        |                      |                                                                                                                                                                                                                                 |
| 33 | Statistical methods    | <a href="#">#12c</a> | Explain how missing data were addressed                                                                                                                                                                                         |
| 34 |                        |                      |                                                                                                                                                                                                                                 |
| 35 |                        |                      |                                                                                                                                                                                                                                 |
| 36 | Statistical methods    | <a href="#">#12d</a> | If applicable, explain how loss to follow-up was addressed                                                                                                                                                                      |
| 37 |                        |                      |                                                                                                                                                                                                                                 |
| 38 |                        |                      |                                                                                                                                                                                                                                 |
| 39 |                        |                      |                                                                                                                                                                                                                                 |
| 40 |                        |                      |                                                                                                                                                                                                                                 |
| 41 |                        |                      |                                                                                                                                                                                                                                 |
| 42 | Statistical methods    | <a href="#">#12e</a> | Describe any sensitivity analyses                                                                                                                                                                                               |
| 43 |                        |                      |                                                                                                                                                                                                                                 |
| 44 |                        |                      |                                                                                                                                                                                                                                 |
| 45 | 6                      |                      |                                                                                                                                                                                                                                 |
| 46 |                        |                      |                                                                                                                                                                                                                                 |
| 47 |                        |                      |                                                                                                                                                                                                                                 |
| 48 | <b>Results</b>         |                      |                                                                                                                                                                                                                                 |
| 49 |                        |                      |                                                                                                                                                                                                                                 |
| 50 |                        |                      |                                                                                                                                                                                                                                 |
| 51 | Participants           | <a href="#">#13a</a> | Report numbers of individuals at each stage of study— eg numbers potentially eligible, examined for eligibility, confirmed eligible, included in the study, completing follow-up, and analysed. Give information separately for |
| 52 |                        |                      |                                                                                                                                                                                                                                 |
| 53 |                        |                      |                                                                                                                                                                                                                                 |
| 54 |                        |                      |                                                                                                                                                                                                                                 |
| 55 |                        |                      |                                                                                                                                                                                                                                 |
| 56 |                        |                      |                                                                                                                                                                                                                                 |
| 57 |                        |                      |                                                                                                                                                                                                                                 |
| 58 |                        |                      |                                                                                                                                                                                                                                 |
| 59 |                        |                      |                                                                                                                                                                                                                                 |
| 60 |                        |                      |                                                                                                                                                                                                                                 |

for exposed and unexposed groups if applicable.

1  
2  
3  
4 Participants [#13b](#) Give reasons for non-participation at each stage N/a – will be  
5  
6 done for  
7  
8 results, this is  
9  
10 a protocol  
11  
12

13 Participants [#13c](#) Consider use of a flow diagram

14  
15  
16 N/a – will be done  
17  
18 for results, this is a  
19  
20 protocol  
21  
22  
23

24 Descriptive data [#14a](#) Give characteristics of study participants (eg N/a – will be  
25 demographic, clinical, social) and information on done for  
26 exposures and potential confounders. Give information results, this is  
27 separately for exposed and unexposed groups if a protocol  
28 applicable.  
29  
30  
31  
32  
33  
34  
35

36 Descriptive data [#14b](#) Indicate number of participants with missing data for  
37 each variable of interest  
38  
39  
40

41 N/a – will be done  
42  
43 for results, this is a  
44  
45 protocol  
46  
47  
48

49 Descriptive data [#14c](#) Summarise follow-up time (eg, average and total  
50 amount)  
51  
52  
53

54 N/a – will be done  
55  
56 for results, this is a  
57  
58  
59



1 protocol

2  
3  
4 Outcome data

[#15](#)

Report numbers of outcome events or summary  
measures over time. Give information separately for  
exposed and unexposed groups if applicable.

5  
6  
7  
8  
9  
10  
11 N/a – will be done

12  
13 for results, this is a

14  
15 protocol

16  
17  
18  
19 Main results

[#16a](#)

Give unadjusted estimates and, if applicable,  
confounder-adjusted estimates and their precision (eg,  
95% confidence interval). Make clear which  
confounders were adjusted for and why they were  
included

N/a – will be  
done for  
results, this is  
a protocol

20  
21  
22  
23  
24  
25  
26  
27  
28  
29  
30  
31 Main results

[#16b](#)

Report category boundaries when continuous variables  
were categorized

N/a – will be  
done for  
results, this is  
a protocol

32  
33  
34  
35  
36  
37  
38  
39  
40  
41 Main results

[#16c](#)

If relevant, consider translating estimates of relative risk  
into absolute risk for a meaningful time period

42  
43  
44  
45  
46 N/a – will be done

47  
48 for results, this is a

49  
50 protocol

51  
52  
53  
54 Other analyses

[#17](#)

Report other analyses done—eg analyses of subgroups  
and interactions, and sensitivity analyses
